# Supplementary material for: Caste, religion and regional differentials in life expectancy at birth in India: cross-sectional estimates from recent National Family Health Survey
Source: PubMed Central journal article supplement — BMJ Open. 2020 Aug 20;10(8):e035392. doi: 10.1136/bmjopen-2019-035392 (PMC7440832; doi:10.1136/bmjopen-2019-035392), 2020-08-20
Supplement: bmjopen-2019-035392.draft_revisions.pdf [file bmjopen-2019-035392.draft_revisions.pdf]

# BMJ Open

BMJ Open is committed to open peer review. As part of this commitment we make the peer review history of every article we publish publicly available.

When an article is published we post the peer reviewers' comments and the authors' responses online. We also post the versions of the paper that were used during peer review. These are the versions that the peer review comments apply to.

The versions of the paper that follow are the versions that were submitted during the peer review process. They are not the versions of record or the final published versions. They should not be cited or distributed as the published version of this manuscript.

BMJ Open is an open access journal and the full, final, typeset and author-corrected version of record of the manuscript is available on our site with no access controls, subscription charges or pay-per-view fees (<http://bmjopen.bmj.com>).

If you have any questions on BMJ Open's open peer review process please email [info.bmjopen@bmj.com](mailto:info.bmjopen@bmj.com)

# BMJ Open

## Caste, religion and regional differentials in life expectancy at birth in India

|                               |                                                                                                                                                                                        |
|-------------------------------|----------------------------------------------------------------------------------------------------------------------------------------------------------------------------------------|
| Journal:                      | <i>BMJ Open</i>                                                                                                                                                                        |
| Manuscript ID                 | bmjopen-2019-035392                                                                                                                                                                    |
| Article Type:                 | Original research                                                                                                                                                                      |
| Date Submitted by the Author: | 31-Oct-2019                                                                                                                                                                            |
| Complete List of Authors:     | Kumari, Meena; International Institute for Population Sciences, Fertility Studies<br>Mohanty, Sanjay; INTERNATIONAL INSTITUTE FOR POPULATION SCIENCES, DEPARTMENT OF FERTILITY STUDIES |
| Keywords:                     | PUBLIC HEALTH, EPIDEMIOLOGY, Adult intensive & critical care < INTENSIVE & CRITICAL CARE                                                                                               |
|                               |                                                                                                                                                                                        |

SCHOLARONE™  
Manuscripts

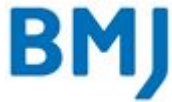

I, the Submitting Author has the right to grant and does grant on behalf of all authors of the Work (as defined in the below author licence), an exclusive licence and/or a non-exclusive licence for contributions from authors who are: i) UK Crown employees; ii) where BMJ has agreed a CC-BY licence shall apply, and/or iii) in accordance with the terms applicable for US Federal Government officers or employees acting as part of their official duties; on a worldwide, perpetual, irrevocable, royalty-free basis to BMJ Publishing Group Ltd ("BMJ") its licensees and where the relevant Journal is co-owned by BMJ to the co-owners of the Journal, to publish the Work in this journal and any other BMJ products and to exploit all rights, as set out in our [licence](#).

The Submitting Author accepts and understands that any supply made under these terms is made by BMJ to the Submitting Author unless you are acting as an employee on behalf of your employer or a postgraduate student of an affiliated institution which is paying any applicable article publishing charge ("APC") for Open Access articles. Where the Submitting Author wishes to make the Work available on an Open Access basis (and intends to pay the relevant APC), the terms of reuse of such Open Access shall be governed by a Creative Commons licence – details of these licences and which [Creative Commons](#) licence will apply to this Work are set out in our licence referred to above.

Other than as permitted in any relevant BMJ Author's Self Archiving Policies, I confirm this Work has not been accepted for publication elsewhere, is not being considered for publication elsewhere and does not duplicate material already published. I confirm all authors consent to publication of this Work and authorise the granting of this licence.

# Caste, religion and regional differentials in life expectancy at birth in India

Meena Kumari, International Institute for population Sciences (IIPS), Govandi station Road, Deonar, Mumbai-400088

Email: meenaiips@gmail.com

Prof. Sanjay Kumar Mohanty, Department of Fertility Studies, International Institute for population Sciences (IIPS) Mumbai-400088, India

Email: sanjayiips@yahoo.co.in

## **Word Count: 3535**

**Keywords:** Age Specific Death rate, Life expectancy, Adult Mortality, Premature Mortality, Caste, Religion, and Regions

**Objective** Though estimates of longevity are available for states of India by sex and place of residence, disaggregated estimates by social and economic characteristics are not available. In this study we have estimated the life expectancy at birth by caste, religion and in regions of India. **Design:** This study primarily used data from National Family Health Survey (NFHS-4), 2015-2016 and the Sample Registration System (SRS), 2011-2015 is used in estimation. The NFHS 4 is the largest ever demographic and health survey in India covering 601,509 households, 811,808 individual. **Measures:** The abridged life table is constructed to estimate the life expectancy at birth, adult mortality ( $_{15}q_{59}$ ) and premature mortality ( $_{0}q_{70}$ ) by caste, religion and regions. **Results:** The life expectancy at birth was estimated at 66.4 years for schedule caste (SC), 67.2 years for scheduled tribe (ST), 68.1 years for OBC, and 70.4 years for others. The life expectancy at birth was higher among female compared to males across the social group in India. The life expectancy at birth was higher among Christian (71 years) followed by Muslim (68 years) and Hindu (68 years). The life expectancy ranges from 67–71 years across regions of India. With a difference of more than 4 years, the life expectancy was as low as 66.6 years in central regions compared to 70.9 years in West region. **Conclusion:** Many Health Policies promoting health system in India. But the improvements in health were not uniform throughout the country. Disparity by caste, religion, and sex in health remains large in India.

## **Strengths and Limitations of the study:**

- This is the first ever study that provided the estimates of premature mortality and adult mortality by social characteristics of the society e.g. caste and religion in India.
- It also estimated the life expectancy at birth by caste and religions by different regions in India.
- Disease burden, disability among female and Cause of adult mortality and premature death in India were not explored in this study.

- However, the study could not analyse the estimates of life expectancy at birth, adult mortality and premature mortality for all Indian states separately due to the unavailability of appropriate number of sample.
- The NFHS was not powered to calculate mortality rate like SRS. To make it comparable with SRS and analyse the mortality data by different socio-economic characteristics we computed multiple calibration factors and link it with the datasets. So, we have not been able to provide the CIs for our estimates.

## Introduction

Life expectancy at birth is one of the most frequently used summary measure of health of any population. Besides, it is used to quantify the health dimension of human development index [1]. Globally, the life expectancy at birth is converging among countries [2,3]. It is also converging across geographical regions within national boundary [3,4]. Besides life expectancy at birth, infant mortality rate, under-five mortality rate and utilisation of basic health services are converging [5–7]. The sex differential in life expectancy at birth has been narrowing down and the focus of research in both developed and developing countries [8–12]. Findings from large number of studies in developing countries suggests that female are disadvantages in health and health care [13]. Though life expectancy at birth has been rising in almost all societies but mortality differences exist within, as well as, between the population sub-group within national and regional boundaries [14–23]. This disparity in mortality is believed to have its roots in differential socioeconomic background of different social groups and has been increasing in India [24–26]. Urban inhabitants of the developing world generally enjoy improved medical care and means of life, better education, and other improved socio-economic facilities, which impact positively on health outcomes [27–30].

India with a population of 1.35 billion in 2018 is experiencing significant improvement in health indicators. The life expectancy at birth has increased from 58.7 years in 1990 to 68.30 years by 2015 (RGI). The state variations in life expectancy has been narrowing down over time. Although India has witnessed a spectacular improvement in mortality, the changes in mortality conditions across its states have been different [26]. There was a strong North-South gradient across the states, with great variations in the level and the pace of mortality reduction over time [31–33]. For instance, the life expectancy was higher in Kerala than Uttar Pradesh in India [34–37]. Similarly the adult mortality and premature deaths are high [33]. The national and state average in life expectancy conceals large variation among states and social groups in India.

Caste and religion plays an important determinant of health; education, employment, social and economic outcomes in India. Caste and religion are often used as key social variables and given priority in national and state policies. The caste structure is also said to have associated with economic wellbeing of the household. For the benefit of welfare schemes in India, the population of India are classified into four caste groups namely schedule caste, schedule tribe,

1  
2  
3 other backward class and others. The ST population, accounting 8.6% of total population are  
4 most deprived population followed by SC population. A large number of studies has examined  
5 the caste differentials in health and health care in India and states and found poor health of SC  
6 and ST population [38–40]. However, studies suggest that the socio-economic inequality has  
7 been increasing over time [41–43]. The socio-economic inequality is associated with poor  
8 health outcome among sub-group of population in the country [44–47].  
9  
10  
11

12 The sample registration system (SRS) provides regular estimates of life expectancy at birth  
13 and age specific death rate for major states, by sex and for rural and urban areas. However,  
14 such estimates are not available for social groups such as caste and religion and by economic  
15 groups. To our knowledge there were two studies that provided the estimates of life expectancy  
16 by social group/ economic groups. Mohanty and Ram (2010) estimated the life expectancy at  
17 birth among social group using NFHS-2 and NFHS-3 data and found that life expectancy at  
18 birth are similar among poor across caste groups [48]. Recently, [47] provides the estimates  
19 of life expectancy at birth across wealth quintile using NFHS 4 data and found that life  
20 expectancy at birth among poorest wealth quintile was 65.1 years lower than that of 72.7 years  
21 in richest wealth quintile. Earlier studies have identified the discrimination by quantifying  
22 whether differences in socioeconomic and health status in India. [49] explain lower caste  
23 children have worse height outcomes than higher caste in rural India [50]. Children's belonging  
24 to the STs, SCs and OBC can account for differences in health outcomes. [51] explain SC  
25 women's may be inequitably served by maternal health services and in some cases may face  
26 specific discrimination. Low health status are observed among poor, female, rural, and specific  
27 minority groups of Scheduled tribe and Scheduled castes [52]. In comparison to general caste,  
28 lower caste (OBC, SC/ST) women's were more likely to experience discrimination in rural  
29 western India [53]. Lower caste women reported a higher prevalence of poor health than higher  
30 caste [38,54]. At age 60, life expectancy, active life expectancy and inactive life expectancy  
31 estimates were significantly higher, by 2.3, 1.9 and 0.4 years, for older persons in the General  
32 castes group versus those in the SC/ST/OBC group respectively [46,55]. In case of regions the  
33 life expectancy were lower among central region than other regions other studies also support  
34 these findings [40,56].  
35  
36  
37  
38  
39  
40  
41  
42

43 The national average conceal large variations across population sub-group and by socio-  
44 economic characteristics. This is one of the few study that examine the mortality pattern and  
45 life expectancy ST, SC, OBC and Others, religion and by measures of life expectancy at birth  
46 are not often available across population sub-groups. It also examine the health inequalities  
47 within caste and regions and examine if these differences also followed a socioeconomic  
48 patterning.  
49  
50  
51  
52

### 53 **Data Sources:**

54 Data from National Family Health Survey (NFHS-4), 2015-16 and the Sample Registration  
55 System (SRS), 2011-2015 is used in estimation. The National Family Health Surveys (NFHSs)  
56 are the large-scale, multi-round survey, conducted in a representative sample of households  
57 throughout India. The first round of NFHS was conducted in 1992-93 and completed its fourth  
58 round in 2014-15. The NFHS 4 is the largest ever demographic and health survey in India that  
59  
60

covered 601,509 households and 811,808 individual. The NFHS provides consistent and reliable estimates of fertility, mortality, family planning, child nutritional status, morbidity, utilization of maternal and child health care services, anaemia, utilization and quality of health and family planning services and other related indicators. NFHS-4 collects data at the national and district level and had the distinction of the largest ever population based health survey in the country.

Questions on death of any members to the households in a three-year reference period was collected in NFHS4. A total of 74,945 deaths were recorded during survey. Along with death records, data on sex, place of residence, caste, religion and household's assets and amenities were collected. The caste data are generally collected by Scheduled Caste (SC), Scheduled Tribe (ST), Other Backward Class (OBC), and Others. Generally, the ST are considered to be socially and economically poorer followed by SC and OBC. Many central and state government welfare schemes are specifically designed for the welfare of the population. Similarly, data on religion were collected in seven groups. These are Hindu, Muslim, Christian, Sikh, Buddhist, Jain, Other religion and persuasions and religion not stated. According to Census of India 2011, 79.80 % of the population in India were Hindus, 14.23 % were Muslims and 2.30 % Christians and 3.69% others. We have combined Sikh, Buddhist, Jain, Other Religion and Not Stated religion group owing to sample size constraints. Besides, the ASDR from SRS is used to compare the mortality rate across age group.

#### **Methods:**

The SRS data do not provide information on death by socio-economic status (SES). The advantages of using NFHS data is use of its death statistics by socio-economic characteristics. In the NFHS-4, 0.6 per cent (479) of 74,945 deaths were found missing for one or more socio-economic status (SES). The missing information on SES for age at death were adjusted and explained below.

The followings steps were used in computing the ASDR, life expectancy at birth, adult mortality ( $_{15q_{59}}$ ) and premature mortality ( $_{0q_{70}}$ ) by caste and religion.

1. Adjustment of Missing Death cases: The cases with missing information on SES for age at death were inflated by  $100/100-x$  for each age groups [47].
2. Computing Age Specific Death Rate (ASDR): To calculate annual death rates, the age-specific death, 74945 in total, was divided by 3 to make the death annually, assuming constant mortality rates across the 3 years prior to survey.
3. Adjustment of ASDR: The number of age-specific death was computed using the information from death reported in last three year prior to survey, at household level. 479 cases were found missing for some basic variables like age, sex and other SES characteristics. We have distributed 479 cases equally in each age group by using statistical method aforementioned in method used.
4. To make comparable death rates with the SRS, the death rates generated on NFHS data was adjusted with a calibration factor (C-factor), a factor to minimize the relative difference between death rates computed on different data source, for example, NFHS and SRS on household characteristics, for instance, caste, household poverty, religion and regions. The calibration factor was multiplied with the age-specific death rate compute using NFHS-4 data to make it equivalent with SRS rates [47]. Similarly,

1  
2  
3 multiplying all subgroup of caste, religion and region with the appropriate C-Factor to  
4 derive mortality rates for each subgroups in NFHS data. In our calculation C-Factor  
5 was calculated by using NFHS and SRS data by sex in India.

- 6  
7 5. The abridged life table is constructed to estimate the life expectancy at birth, adult  
8 mortality ( ${}_{15}q_{59}$ ) and premature mortality ( ${}_{0}q_{70}$ ) by caste, religion and regions. The  
9 premature mortality is defined as any death under 70 years of age. The mathematical  
10 form of Premature ( ${}_{0}q_{70}$ )  $= \frac{l_0}{l_{70}}$ ; and Mortality in working age ( ${}_{15}q_{59}$ )  $= \frac{l_{15}}{l_{59}}$ .

11  
12  
13  
14  
15 Finally, the age specific death rate was used to compute life expectancy at birth by sex, caste,  
16 religion and regions using the Chiang method. In Chiang method the  ${}_n a_x$  is estimated by average  
17 number of years lived in the  $x$  to  $x + n$  age interval by those dying in the interval [57,58].  
18 Calibration factor is the ratio of response from detector to the analyte concentration. The  
19 purpose of this test is to characterize the calibration factor of the power sensor at each frequency  
20 parameter. The calibration factor created will be used as the correction for the power measured.  
21  
22

### 23 24 **Patient and public involvement**

25 Patients and the public were not involved. The paper uses secondary data available for public  
26 use.  
27

### 28 29 **Result**

30  
31 **Figure 1** plot the ASDR was from SRS and NFHS in five-year age group. In general, the ASDR  
32 are close from both the sources and the ASDRs overlap in large number of age group. However,  
33 considering the SRS mortality as standard, we have used the calibration factor for mortality by  
34 five year age groups. The overall life expectancy at birth was estimated at 65.3 years from  
35 NFHS 4 compared to 68.3 years from SRS. **Table 1** presents the numerical value of ASDR  
36 from SRS and NFHS by five-year age group and the calibration factors. The life expectancy at  
37 birth was 68.3 years and 65.3 years from SRS and NFHS respectively—a difference of 1.05  
38 years in India. **Figure 2** presents the life expectancy at various ages. The differences in life  
39 expectancy from these two sources suggests that, the life expectancy estimated from NFHS is  
40 slightly lower than that of SRS. Beyond age 45, the ASDR from NFHS 4 are lower than that  
41 of SRS. The result suggest that life-expectancy varies by different social characteristics, say  
42 caste, religion and regions in India.  
43  
44  
45  
46  
47

48 **Figure 3** summarized the estimated ASDR by caste in India. The ASDR were higher among  
49 SC (0.0483) followed by OBC (0.0439), ST (0.0400) and then others (0.0378) at age below 1.  
50 Similarly at latter ages curve shows a zigzag pattern in each category. Contrastingly, at age 80  
51 years and later, the ASDR was higher among for population belonging to others caste (0.1217)  
52 than SC (0.1205) in India. **Figure 4** presents the age-specific death rate by religion. The ASDR  
53 were higher among Muslim (0.0451) than others (0.0274) for age below 1. Among population  
54 between age group 1-4 and 45-49, the ASDR was higher for Hindu than that of Muslims. But  
55 at latter ages ASDR were higher among Muslim religion followed by Hindu, others and then  
56 Christian in India.  
57  
58  
59  
60



1  
2  
3 **Figure 5**, shows higher ASDR in East region (0.0517) than West region (0.0248) for age below  
4 1 year. Additionally, the death rate among children 1-9 years were higher in Southern than  
5 Northern region (0.0035 versus 0.0005). The death rate were almost similar for 10 to 35 then  
6 starts splitting and higher ASDR in Northeast for age group 35-39 years. The death rate for  
7 population of age group 65-69 were higher in East than West region (0.0353 versus 0.0241) in  
8 India. The iota variation were visible at age below 1 and 1-4 age group and it starts showing a  
9 fair gap among population of age-group 60-64 to 80-85.

10  
11  
12  
13 The life expectancy at birth varies by four years across different caste groups in India (**Table**  
14 **2**). The life expectancy at birth was estimated at 66.4 years for schedule caste, 67.2 years for  
15 scheduled tribe, and 68.1 years for OBC, and 70.4 years for others. Female had higher life  
16 expectancy at birth compared to males and this gap remains consistent by sex across the ethnic  
17 group in India. However, this gap decreases at the onset of elderly age (at age 60 years) and  
18 ranges from 1.2 to 2.8 years across the ethnic groups. The life expectancy at age 60 was 17  
19 years for SC, 18.1 for ST, 17.8 years for OBC and 18.8 years for others. The result is consistent  
20 with other study in terms of life expectancy of women and men [8,9]. Women had higher life  
21 expectancy than men in across different caste categories in India.

22  
23  
24  
25  
26  
27 Religion differentials in life expectancy suggests that the life expectancy at birth was higher  
28 among Christian (71 years) compared to Muslim (68 years) and Hindu (68 years) (**Table 3**).  
29 Table 3 also shows that the gap of life expectancy between male and female was as high as 5  
30 years among Christian followed by others (4 years), Hindu (3 years) and Muslim (2 years) in  
31 India. The sex differential was found higher than 4 years among Christian followed by Hindu,  
32 Others and Muslim at the age of 20 years. The female life expectancy at birth was highest  
33 among Christians (73.8 years) followed by others (72.8 years) and Hindu (69.9 years) but it  
34 was lowest among Muslim in India (**Table 3**).

35  
36  
37  
38  
39 **Table 4** presents the life expectancy at birth by region in India. The life expectancy ranges  
40 from 67–71 years across region. With a difference of more than 4 years, the life expectancy  
41 was as low as 66.6 years in central regions compared to 70.9 years in West region. However,  
42 life expectancy at age 1 was 72 years in North and 69 years in Northeast region – a difference  
43 of 3.1 years. Similarly, among male, life expectancy ranged from a low among Northeast (64.9  
44 years) to high among West region (68.8 years) –a difference of 3.9 years. At age1, the gap in  
45 life expectancy by sex was as high as 6 year in South followed by West (4.4 years), North (4.3  
46 years) and Northeast region (4.2 years). Below age 1, the gap in LE by sex was lower in East  
47 region. Similarly, female life expectancy at birth was higher among West region (73.2 years)  
48 and lower in East region (67.1 years), a difference of 6.1 years.

49  
50  
51  
52  
53 The probability of death for adult and premature mortality were estimated by sex, region, and  
54 religion. The results were presented in table 5 and 6. **Table 5** findings shows that the level of  
55 adult mortality is higher for males than females in India. The individual belonging to SCs 0.14  
56 has higher probability of adult death than individual belonging to others caste group 0.11.  
57 Similarly, by religion, the probability of death for Hindu 0.13 were higher than others 0.13  
58 followed by Christians 0.11 and Muslims 0.12. By region, the probability of dying for adult  
59  
60

1  
2  
3 death in northeast region was higher 0.15 in west 0.11 of India. Similar to adult mortality the  
4 **table 6** summarized that the premature mortality and it was higher for male than the female.  
5 By caste group, individual belonging to SC caste has higher probability of premature mortality  
6 than general caste 0.14 versus 0.11. The premature mortality was also analysed by religions  
7 and regions in India. The risk of premature mortality vary by religion. For instance, Muslims  
8 0.30 had higher premature mortality than Christian 0.26. By region, the probability of  
9 premature mortality in Northeast region 0.34 was found to be higher followed by Central 0.33,  
10 East 0.32, South 0.29, West 0.26, and North region 0.26.  
11  
12  
13

14 Prior studies suggests that caste and religion differential shows inequality in mortality across  
15 both population, subgroups and geographic areas in [44,59,60]. This study addressing ethnic  
16 disparities in health and provide evidence for the gap in life expectancy across different ethnic  
17 groups in India.  
18  
19

## 20 Discussion

21 Life expectancy at birth is widely used as a summary measure of health. Disaggregated  
22 estimates of life expectancy are limited in many developing countries including India. This is  
23 the first ever study that estimated the life expectancy at birth by social groups such as caste and  
24 religion in India. The followings are salient findings of this study.  
25  
26  
27

28 **First**, we found remarkable variation in life expectancy at birth across caste and religion in  
29 India. The life expectancy at birth among SC was lowest followed by ST, OBC and others.  
30 The gap in life expectancy at birth others was 4 years. **Second**, the caste and religion  
31 differentials in life expectancy was not only observed at birth but also across ages. The gap in  
32 life expectancy among SC and others narrowed down at age 1-4 and continues decline up to  
33 age group 80-84. However in case of religion, we found higher life expectancy among  
34 Christians followed by Others, Muslims and then Hindu. The gap in life expectancy at birth  
35 between Christian and Hindu was 3 years. The life expectancy was as low in central regions  
36 compared West region at age below 1 year. **Third**, we found consistent sex differentials in life  
37 expectancy across caste and religion groups. The life expectancy at birth for women was higher  
38 for men in across the social group in both rural and urban and these findings are consistent in  
39 literature. **Fourth**, the adult mortality ( $_{15}q_{59}$ ) were higher among SC than others and gap  
40 between SC and Others was 0.4. However in case of religion, the probability of adult death  
41 ( $_{15}q_{59}$ ) were higher among Hindus than Muslims in India. In case of region the probability of  
42 death were higher among northeast than west region in India. **Fifth** premature mortality ( $_{0}q_{70}$ )  
43 were higher among SC than their counterpart from others caste group in India. However in case  
44 of religion the premature deaths ( $_{0}q_{70}$ ) among Muslims were higher than Christians. By region,  
45 the premature mortality ( $_{0}q_{70}$ ) in Northeast region were higher than North region in India.  
46  
47  
48  
49  
50  
51

## 52 EXPALNATION WHY SUCH RESULTS

53 We put forward the following explanation to our findings. The caste system, with its societal  
54 stratification and social restrictions, continues to have a major impact in India [61]. Caste and  
55 religion is inextricably linked to and is a proxy for socio-economic status in India. The poor  
56 socioeconomic status (SES) is significantly associated with poor health outcomes and low  
57 access to health-care facilities. Caste-based exclusion is related to lack of access to services  
58  
59  
60

1  
2  
3 offered by societies. Lower accessibility and poorer health statistics are observed among the  
4 lower castes in India. The ill health and disability has increased with increasing longevity.  
5 Similarly gender variation in health is consistent with other studies. At latter ages women  
6 reported marginally higher disability than [62]. The average year of disability free life  
7 expectancy among female was lower than male in India. It is well-established fact that life  
8 expectancy among female was lower than male in India. It is well-established fact that life  
9 expectancy dividing gender is a well-organized result observed throughout the world and it has  
10 been explained by a combination of biological and behavioural factors [47]. Adult mortality  
11 risks could be a result of chronic infection or malnutrition in childhood. Most of the non-  
12 communicable diseases are non-curable but can be controlled with regular treatment. On other  
13 hand, while the risk of being affected by these life-style conditions is relatively lower among  
14 the poor, once affected, they cannot afford the continued high treatment costs and so they  
15 experience a premature death. Finding indicates significant differences in the population's  
16 health across different caste, religion and regions. The Hindu children have higher mortality  
17 than Muslim children's [63].  
18  
19  
20  
21

22 The reduction of premature mortality, a major public health focus, is one of the UN Sustainable  
23 Development Goals [64]. Mortality rate has decreased for most age groups from 2000 to 2016,  
24 especially for adolescents and young adults in many developed and developing regions but  
25 remains high among middle aged adult (ages 36-55) and older adult (55 years) but premature  
26 mortality and adult mortality is still higher among all ethnic groups globally [65,66].  
27  
28  
29  
30

### 31 **Conclusion:**

32 The findings suggest that the mortality differentials are significant across caste, religion and  
33 regions in India. Though, female life expectancy at birth is higher for female, they might be  
34 suffering from higher morbidity. The premature mortality is high across caste and religion  
35 groups. Prioritising reduction of premature mortality including infant and under-five mortality  
36 among SC and ST is recommended.  
37  
38  
39  
40  
41  
42  
43

44 **Figure 1: Age specific death rate from NFHS-4 and SRS, 2011-2015, in India.**

45  
46  
47 **Figure 2: Estimated life expectancy at birth from NFHS-4, 2015-16 and SRS, 2011-15 in India.**

48  
49  
50  
51 **Figure 3: Adjusted Age Specific death rate across caste groups in India 2015-16.**

52  
53  
54  
55 **Figure 4: Age Specific death rate by Religions in India.**

56  
57  
58  
59 **Figure 5: Age Specific death rate across Regions of India 2015-16.**  
60

**Table 1: ASDR by five year age group and estimated life expectancy from NFHS 4 and SRS in India, 2015-16**

| Age group | ASDR_NFHS | ASDR_SRS | Calibration Factors | Life expectancy NFHS 2015 | Life expectancy SRS 2015 | Calibration Factors |
|-----------|-----------|----------|---------------------|---------------------------|--------------------------|---------------------|
| 0-1       | 0.0485    | 0.0429   | 0.8846              | 65.3                      | 68.3                     | 1.05                |
| 1-5       | 0.0055    | 0.0022   | 0.4021              | 67.5                      | 70.3                     | 1.04                |
| 5-10      | 0.0049    | 0.0008   | 0.1677              | 65.0                      | 66.9                     | 1.03                |
| 10-15     | 0.0008    | 0.0007   | 0.8716              | 61.5                      | 62.2                     | 1.01                |
| 15-20     | 0.0014    | 0.0011   | 0.7546              | 56.8                      | 57.4                     | 1.01                |
| 20-25     | 0.0018    | 0.0015   | 0.8058              | 52.2                      | 52.7                     | 1.01                |
| 25-30     | 0.0021    | 0.0017   | 0.7782              | 47.6                      | 48.1                     | 1.01                |
| 30-35     | 0.0036    | 0.0020   | 0.5686              | 43.1                      | 43.5                     | 1.01                |
| 35-40     | 0.0032    | 0.0027   | 0.8663              | 38.8                      | 38.9                     | 1.00                |
| 40-45     | 0.0045    | 0.0038   | 0.8263              | 34.4                      | 34.4                     | 1.00                |
| 45-50     | 0.0060    | 0.0054   | 0.8924              | 30.1                      | 30.0                     | 0.99                |
| 50-55     | 0.0083    | 0.0086   | 1.0365              | 26.0                      | 25.7                     | 0.99                |
| 55-60     | 0.0147    | 0.0127   | 0.8627              | 22.0                      | 21.7                     | 0.99                |
| 60-65     | 0.0188    | 0.0196   | 1.0422              | 18.5                      | 18.0                     | 0.97                |
| 65-70     | 0.0311    | 0.0303   | 0.9720              | 15.1                      | 14.6                     | 0.97                |
| 70-75     | 0.0418    | 0.0465   | 1.1126              | 12.2                      | 11.5                     | 0.95                |
| 75-80     | 0.0821    | 0.0700   | 0.8529              | 9.4                       | 8.9                      | 0.94                |
| 80-85     | 0.0856    | 0.1142   | 1.3347              | 8.0                       | 6.6                      | 0.82                |
| 85+       | 0.1664    | 0.2058   | 1.2370              | 6.0                       | 4.9                      | 0.81                |

**Table 2. Life expectancy by caste and Sex in India, 2015-16.**

| Age interval   | SC    |      |        | ST    |      |        | OBC   |      |        | Others |      |        |
|----------------|-------|------|--------|-------|------|--------|-------|------|--------|--------|------|--------|
|                | Total | Male | Female | Total | Male | Female | Total | Male | Female | Total  | Male | Female |
| <b>Below 1</b> | 66.4  | 64.4 | 68.6   | 67.2  | 64.7 | 70.1   | 68.1  | 66.7 | 69.7   | 70.4   | 69.2 | 71.7   |
| <b>1-4</b>     | 68.7  | 66.7 | 70.9   | 68.9  | 66.6 | 71.6   | 70.2  | 68.6 | 71.9   | 72.1   | 70.7 | 73.6   |
| <b>5-9</b>     | 65.3  | 63.1 | 67.7   | 65.7  | 63.3 | 68.5   | 66.8  | 65.1 | 68.7   | 68.6   | 67.1 | 70.2   |
| <b>10-14</b>   | 60.5  | 58.4 | 63.0   | 60.9  | 58.5 | 63.7   | 62.1  | 60.3 | 64.0   | 63.8   | 62.4 | 65.5   |
| <b>15-19</b>   | 55.8  | 53.6 | 58.2   | 56.2  | 53.8 | 59.0   | 57.3  | 55.5 | 59.2   | 59.0   | 57.5 | 60.6   |
| <b>20-24</b>   | 51.1  | 49.0 | 53.5   | 51.6  | 49.1 | 54.4   | 52.6  | 50.8 | 54.5   | 54.3   | 52.7 | 55.9   |
| <b>25-29</b>   | 46.5  | 44.4 | 48.9   | 47.1  | 44.6 | 49.9   | 47.9  | 46.2 | 49.8   | 49.6   | 48.1 | 51.3   |
| <b>30-34</b>   | 41.9  | 39.9 | 44.3   | 42.6  | 40.1 | 45.3   | 43.3  | 41.6 | 45.2   | 44.9   | 43.4 | 46.5   |
| <b>35-39</b>   | 37.4  | 35.4 | 39.7   | 38.1  | 35.8 | 40.7   | 38.7  | 37.1 | 40.5   | 40.2   | 38.8 | 41.8   |
| <b>40-44</b>   | 32.9  | 31.1 | 35.1   | 33.7  | 31.6 | 36.2   | 34.2  | 32.7 | 35.9   | 35.6   | 34.4 | 37.0   |
| <b>45-49</b>   | 28.7  | 27.0 | 30.6   | 29.5  | 27.4 | 31.8   | 29.8  | 28.4 | 31.3   | 31.1   | 29.9 | 32.4   |
| <b>50-54</b>   | 24.5  | 23.0 | 26.2   | 25.4  | 23.6 | 27.4   | 25.5  | 24.3 | 26.8   | 26.8   | 25.7 | 27.9   |
| <b>55-59</b>   | 20.6  | 19.2 | 22.2   | 21.7  | 20.0 | 23.5   | 21.5  | 20.3 | 22.7   | 22.8   | 22.0 | 23.6   |
| <b>60-64</b>   | 17.0  | 15.8 | 18.3   | 18.1  | 16.8 | 19.6   | 17.8  | 16.8 | 18.8   | 18.8   | 18.2 | 19.4   |
| <b>65-69</b>   | 13.7  | 12.7 | 14.9   | 14.8  | 13.8 | 15.9   | 14.3  | 13.5 | 15.2   | 15.3   | 14.8 | 15.8   |
| <b>70-74</b>   | 10.9  | 10.1 | 11.7   | 11.9  | 10.9 | 12.8   | 11.3  | 10.7 | 12.1   | 12.1   | 11.7 | 12.4   |
| <b>75-79</b>   | 8.2   | 7.5  | 8.9    | 9.1   | 8.4  | 9.9    | 8.7   | 8.2  | 9.3    | 9.5    | 9.2  | 9.7    |
| <b>80-84</b>   | 6.0   | 5.5  | 6.5    | 7.2   | 6.7  | 7.7    | 6.6   | 6.1  | 7.0    | 6.8    | 6.8  | 6.9    |
| <b>85+</b>     | 4.0   | 3.5  | 4.6    | 5.1   | 4.9  | 5.4    | 4.7   | 4.2  | 5.2    | 5.6    | 6.2  | 5.3    |

Table 3. Life expectancy by Religions and Sex in India, 2015-16

| Age interval | Hindu |      |        | Muslim |      |        | Christian |      |        | Others |      |        |
|--------------|-------|------|--------|--------|------|--------|-----------|------|--------|--------|------|--------|
|              | Total | Male | Female | Total  | Male | Female | Total     | Male | Female | Total  | Male | Female |
| Below 1      | 68.1  | 66.5 | 69.9   | 68.3   | 67.3 | 69.3   | 71.3      | 69.1 | 73.8   | 70.6   | 68.7 | 72.8   |
| 1-4          | 70.1  | 68.4 | 72.1   | 70.4   | 69.2 | 71.7   | 72.5      | 70.3 | 75.0   | 71.6   | 69.8 | 73.6   |
| 5-9          | 66.7  | 64.9 | 68.8   | 66.9   | 65.5 | 68.5   | 69.2      | 67.0 | 71.6   | 67.9   | 66.1 | 69.9   |
| 10-14        | 62.0  | 60.2 | 64.1   | 62.1   | 60.7 | 63.7   | 64.6      | 62.4 | 66.9   | 63.1   | 61.3 | 65.1   |
| 15-19        | 57.2  | 55.4 | 59.3   | 57.3   | 55.8 | 58.9   | 59.8      | 57.7 | 62.0   | 58.2   | 56.4 | 60.2   |
| 20-24        | 52.6  | 50.7 | 54.7   | 52.5   | 51.1 | 54.1   | 55.1      | 53.0 | 57.3   | 53.4   | 51.6 | 55.3   |
| 25-29        | 47.9  | 46.1 | 50.0   | 47.9   | 46.5 | 49.4   | 50.3      | 48.1 | 52.6   | 48.7   | 47.0 | 50.5   |
| 30-34        | 43.3  | 41.5 | 45.4   | 43.2   | 41.8 | 44.7   | 45.6      | 43.6 | 47.8   | 44.1   | 42.4 | 45.9   |
| 35-39        | 38.8  | 37.0 | 40.7   | 38.5   | 37.1 | 40.0   | 41.1      | 39.0 | 43.3   | 39.5   | 37.9 | 41.1   |
| 40-44        | 34.3  | 32.7 | 36.1   | 33.9   | 32.6 | 35.3   | 36.6      | 34.7 | 38.5   | 35.2   | 33.6 | 36.9   |
| 45-49        | 29.9  | 28.4 | 31.5   | 29.4   | 28.1 | 30.8   | 32.3      | 30.7 | 34.0   | 31.0   | 29.6 | 32.4   |
| 50-54        | 25.6  | 24.3 | 27.1   | 25.0   | 23.9 | 26.3   | 28.1      | 26.8 | 29.6   | 26.7   | 25.5 | 28.0   |
| 55-59        | 21.7  | 20.5 | 22.9   | 21.1   | 19.9 | 22.3   | 24.0      | 23.0 | 25.0   | 22.7   | 21.6 | 23.8   |
| 60-64        | 17.9  | 17.0 | 18.9   | 17.4   | 16.4 | 18.4   | 20.0      | 19.0 | 21.1   | 19.0   | 18.2 | 19.7   |
| 65-69        | 14.5  | 13.7 | 15.4   | 14.2   | 13.4 | 15.0   | 16.7      | 16.0 | 17.3   | 15.4   | 14.6 | 16.3   |
| 70-74        | 11.4  | 10.8 | 12.2   | 11.5   | 10.9 | 12.0   | 13.0      | 12.5 | 13.4   | 12.2   | 11.6 | 12.8   |
| 75-79        | 8.8   | 8.3  | 9.4    | 8.8    | 8.8  | 8.9    | 10.4      | 10.2 | 10.5   | 9.1    | 8.4  | 9.9    |
| 80-84        | 6.6   | 6.2  | 7.0    | 6.6    | 6.5  | 6.7    | 7.4       | 7.5  | 7.2    | 6.8    | 6.2  | 7.4    |
| 85+          | 4.8   | 4.5  | 5.1    | 4.7    | 4.5  | 5.0    | 6.4       | 6.1  | 6.7    | 5.1    | 5.2  | 5.1    |

Table: 4. Life expectancy across Regions and Sex in India, 2015-16

| Age interval | Northeast |      |        | East  |      |        | North |      |        | Central |      |        | West  |      |        | South |      |        |
|--------------|-----------|------|--------|-------|------|--------|-------|------|--------|---------|------|--------|-------|------|--------|-------|------|--------|
|              | Total     | Male | Female | Total | Male | Female | Total | Male | Female | Total   | Male | Female | Total | Male | Female | Total | Male | Female |
| Below 1      | 66.8      | 64.9 | 69.1   | 66.7  | 66.2 | 67.1   | 70.7  | 68.7 | 73.0   | 66.6    | 65.4 | 67.9   | 70.9  | 68.8 | 73.2   | 69.2  | 66.6 | 72.2   |
| 1-4          | 68.9      | 67.0 | 71.1   | 69.2  | 68.4 | 70.0   | 72.0  | 70.0 | 74.3   | 69.1    | 67.7 | 70.6   | 71.6  | 69.6 | 74.0   | 70.9  | 68.4 | 73.7   |
| 5-9          | 65.7      | 63.7 | 68.1   | 65.7  | 64.8 | 66.7   | 68.4  | 66.3 | 70.8   | 65.7    | 64.1 | 67.4   | 68.1  | 65.9 | 70.7   | 67.8  | 65.3 | 70.7   |
| 10-14        | 60.9      | 58.9 | 63.3   | 61.0  | 60.0 | 61.9   | 63.5  | 61.5 | 65.9   | 60.9    | 59.3 | 62.6   | 63.3  | 61.1 | 65.9   | 63.3  | 60.8 | 66.2   |
| 15-19        | 56.2      | 54.1 | 58.5   | 56.2  | 55.2 | 57.2   | 58.7  | 56.7 | 61.1   | 56.1    | 54.6 | 57.9   | 58.5  | 56.2 | 61.0   | 58.5  | 56.0 | 61.3   |
| 20-24        | 51.5      | 49.5 | 53.9   | 51.5  | 50.5 | 52.5   | 53.9  | 51.9 | 56.3   | 51.5    | 49.9 | 53.2   | 53.7  | 51.4 | 56.4   | 53.7  | 51.3 | 56.5   |
| 25-29        | 46.9      | 44.9 | 49.2   | 46.9  | 45.9 | 47.9   | 49.2  | 47.2 | 51.6   | 46.9    | 45.4 | 48.7   | 49.1  | 46.7 | 51.8   | 49.1  | 46.7 | 51.8   |
| 30-34        | 42.3      | 40.3 | 44.6   | 42.2  | 41.3 | 43.2   | 44.5  | 42.6 | 46.9   | 42.4    | 40.9 | 44.1   | 44.4  | 42.1 | 47.0   | 44.5  | 42.1 | 47.1   |
| 35-39        | 37.7      | 35.9 | 39.9   | 37.7  | 36.8 | 38.6   | 39.9  | 38.0 | 42.1   | 37.8    | 36.4 | 39.4   | 39.7  | 37.5 | 42.3   | 39.9  | 37.7 | 42.4   |
| 40-44        | 33.3      | 31.5 | 35.4   | 33.2  | 32.5 | 34.0   | 35.4  | 33.6 | 37.5   | 33.3    | 31.9 | 34.9   | 35.2  | 33.0 | 37.6   | 35.5  | 33.5 | 37.7   |
| 45-49        | 29.0      | 27.3 | 30.9   | 28.8  | 28.2 | 29.5   | 30.9  | 29.2 | 32.9   | 28.9    | 27.6 | 30.4   | 30.8  | 28.8 | 33.0   | 31.1  | 29.2 | 33.1   |
| 50-54        | 24.9      | 23.6 | 26.5   | 24.5  | 24.0 | 25.1   | 26.7  | 25.1 | 28.5   | 24.7    | 23.5 | 25.9   | 26.6  | 24.8 | 28.5   | 26.8  | 25.2 | 28.6   |
| 55-59        | 21.1      | 19.9 | 22.5   | 20.6  | 20.1 | 21.1   | 22.7  | 21.2 | 24.3   | 20.8    | 19.6 | 22.1   | 22.4  | 21.0 | 24.0   | 22.8  | 21.3 | 24.4   |
| 60-64        | 17.3      | 16.3 | 18.5   | 17.0  | 16.6 | 17.3   | 18.8  | 17.7 | 20.1   | 17.1    | 16.1 | 18.1   | 18.6  | 17.5 | 19.8   | 19.1  | 17.8 | 20.4   |
| 65-69        | 14.4      | 13.5 | 15.3   | 13.5  | 13.2 | 13.8   | 15.2  | 14.2 | 16.3   | 13.9    | 13.1 | 14.8   | 15.2  | 14.2 | 16.2   | 15.6  | 14.6 | 16.6   |
| 70-74        | 11.5      | 11.1 | 12.0   | 10.6  | 10.3 | 11.0   | 12.1  | 11.2 | 13.1   | 11.1    | 10.4 | 11.9   | 11.8  | 11.0 | 12.7   | 12.5  | 11.7 | 13.2   |
| 75-79        | 9.0       | 8.6  | 9.5    | 8.0   | 7.7  | 8.4    | 9.1   | 8.3  | 10.0   | 8.5     | 7.9  | 9.1    | 9.2   | 8.7  | 9.7    | 10.1  | 9.6  | 10.5   |
| 80-84        | 6.6       | 6.3  | 6.8    | 6.0   | 5.9  | 6.0    | 6.6   | 5.9  | 7.4    | 6.4     | 6.0  | 6.8    | 6.8   | 6.3  | 7.2    | 7.6   | 7.3  | 8.0    |
| 85+          | 4.9       | 4.4  | 5.3    | 4.0   | 4.0  | 4.0    | 5.1   | 4.4  | 5.9    | 4.6     | 4.4  | 4.8    | 5.2   | 5.2  | 5.4    | 6.1   | 5.7  | 6.5    |

**Table 5. Probability of death at age 15-59 and premature mortality ages 70 among caste, religion and region in India.**

| Probability of dying between n to x+n Interval |                  |               |                   |                |             |              |
|------------------------------------------------|------------------|---------------|-------------------|----------------|-------------|--------------|
| <b>Caste</b>                                   | <b>SC</b>        | <b>ST</b>     | <b>OBC</b>        | <b>Others</b>  |             |              |
| <b>15q59</b>                                   | 0.1440           | 0.1553        | 0.1223            | 0.1076         |             |              |
| <b>0q70</b>                                    | 0.3348           | 0.3332        | 0.2980            | 0.2604         |             |              |
| <b>Religion</b>                                | <b>Hindu</b>     | <b>Muslim</b> | <b>Christians</b> | <b>Others</b>  |             |              |
| <b>15q59</b>                                   | 0.1275           | 0.1136        | 0.1142            | 0.1265         |             |              |
| <b>0q70</b>                                    | 0.3000           | 0.3042        | 0.2647            | 0.2725         |             |              |
| <b>Region</b>                                  | <b>Northeast</b> | <b>East</b>   | <b>North</b>      | <b>Central</b> | <b>West</b> | <b>South</b> |
| <b>15q59</b>                                   | 0.1467           | 0.1325        | 0.1132            | 0.1374         | 0.1125      | 0.1198       |
| <b>0q70</b>                                    | 0.3407           | 0.3176        | 0.2584            | 0.3300         | 0.2647      | 0.2872       |

**Table 6. Probability of death at age 15-59 and premature mortality ages 70 among different categories of caste, religion and regions by Sex in India.**

| Probability of dying between n to x+n Interval | SC           |               | ST            |               | OBC               |               | Others        |               |             |               |             |               |
|------------------------------------------------|--------------|---------------|---------------|---------------|-------------------|---------------|---------------|---------------|-------------|---------------|-------------|---------------|
| <b>Caste</b>                                   | <b>Male</b>  | <b>Female</b> | <b>Male</b>   | <b>Female</b> | <b>Male</b>       | <b>Female</b> | <b>Male</b>   | <b>Female</b> |             |               |             |               |
| <b>15q59</b>                                   | 0.1732       | 0.1109        | 0.1876        | 0.1202        | 0.1443            | 0.0987        | 0.1322        | 0.0795        |             |               |             |               |
| <b>0q70</b>                                    | 0.3806       | 0.2840        | 0.3926        | 0.2674        | 0.3316            | 0.2628        | 0.2931        | 0.2255        |             |               |             |               |
| <b>Religion</b>                                | <b>Hindu</b> |               | <b>Muslim</b> |               | <b>Christians</b> |               | <b>Others</b> |               |             |               |             |               |
| <b>15q59</b>                                   | 0.1537       | 0.0982        | 0.1265        | 0.1003        | 0.1504            | 0.0757        | 0.1510        | 0.0999        |             |               |             |               |
| <b>0q70</b>                                    | 0.3394       | 0.2572        | 0.3343        | 0.2736        | 0.3167            | 0.2067        | 0.3081        | 0.2349        |             |               |             |               |
| Probability of dying between n to x+n Interval | Northeast    |               | East          |               | North             |               | Central       |               | West        |               | South       |               |
| <b>Regions</b>                                 | <b>Male</b>  | <b>Female</b> | <b>Male</b>   | <b>Female</b> | <b>Male</b>       | <b>Female</b> | <b>Male</b>   | <b>Female</b> | <b>Male</b> | <b>Female</b> | <b>Male</b> | <b>Female</b> |
| <b>15q59</b>                                   | 0.1783       | 0.1116        | 0.1474        | 0.1166        | 0.1371            | 0.0860        | 0.1544        | 0.1186        | 0.1456      | 0.0746        | 0.1549      | 0.0821        |
| <b>0q70</b>                                    | 0.3859       | 0.2871        | 0.3348        | 0.3013        | 0.3002            | 0.2123        | 0.3614        | 0.2974        | 0.3162      | 0.2074        | 0.3422      | 0.2258        |



### **Competing interests**

**Both the authors hereby declare that there are no competing interests.**

### **DECLARATION FOR DOUBLE BLIND**

#### **Availability of data and material**

The data used for the study is available online and is available at public domain

(<https://dhsprogram.com/what-we-do/survey/survey-display-355.cfm>), and

[http://www.censusindia.gov.in/vital\\_statistics/Appendix\\_SRS\\_Based\\_Life\\_Table.html](http://www.censusindia.gov.in/vital_statistics/Appendix_SRS_Based_Life_Table.html)

**Funding:** The authors have not declared a specific grant for this research from any funding agency in the public, commercial or not-for-profit sectors.

**Contributors:** Meena Kumari and Sanjay Kumar Mohanty conceptualised the paper, prepared the analytical plan and wrote the paper.

**Competing Interests:** None

**Provenance and peer review:** Not commissioned; externally peer reviewed.

#### **Acknowledgements**

None to acknowledge.

### **References:**

- 1 WHO. World Health Statistics 2016 Monitoring health For The SDGs. Geneva: 2016.
- 2 Wilson C. Understanding Global Demographic Convergence since 1950. *Popul Dev Rev* 2011;**37**:375–88. doi:10.1111/j.1728-4457.2011.00415.x
- 3 Gerry CJ, Raskina Y, Tsyplakova D. Convergence or Divergence? Life Expectancy Patterns in Post-communist Countries, 1959-2010. *Soc Indic Res* 2018;**140**:309–32. doi:10.1007/s11205-017-1764-4
- 4 Joe W, Liou L, Subramanian S V. Increasing global heterogeneity in the life expectancy of older populations. *bioRxiv* 2019;:589630. doi:10.1101/589630
- 5 McMichael AJ, McKee M, Shkolnikov V, *et al*. Mortality trends and setbacks: global convergence or divergence? *Lancet* 2004;**363**:1155–9. doi:https://doi.org/10.1016/S0140-6736(04)15902-3
- 6 Moser K, Shkolnikov VM, Leon DA. World Mortality 1950–2000: Divergence Replaces Convergence from the Late 1980s BT - HIV, Resurgent Infections and Population Change in Africa. In: Caraël M, Glynn JR, eds. . Dordrecht: : Springer Netherlands 2007. 11–25. doi:10.1007/978-1-4020-6174-5\_1

- 1  
2  
3 7 Wang H, Naghavi M, Allen C, *et al.* Global, regional, and national life expectancy, all-cause mortality, and cause-specific mortality for 249 causes of death, 1980–2015: a systematic analysis for the Global Burden of Disease Study 2015. *Lancet* 2016;**388**:1459–544. doi:[https://doi.org/10.1016/S0140-6736\(16\)31012-1](https://doi.org/10.1016/S0140-6736(16)31012-1)
- 8 8 Division UND of IE and SAP. Sex differentials in survivorship in the developing world: levels, regional patterns and demographic determinants. *Popul Bull UN* 1988;:51.
- 9 9 Gleit DA, Horiuchi S. The Narrowing Sex Differential in Life Expectancy in High-Income Populations: Effects of Differences in the Age Pattern of Mortality. *Popul Stud (NY)* 2007;**61**:141–59.<http://www.jstor.org/stable/27643410>
- 10 10 Zanfongnon R, Bourbeau R. Sex Differential in Life Expectancy at Birth in Canada, 1921-2004: Provincial Variations. 2008.
- 11 11 Dubey M, Ram U, Ram F. Threshold Levels of Infant and Under-Five Mortality for Crossover between Life Expectancies at Ages Zero, One and Five in India: A Decomposition Analysis. *PLoS One* 2015;**10**:e0143764.<https://doi.org/10.1371/journal.pone.0143764>
- 12 12 Singh A, Ladusingh L. Life expectancy at birth and life disparity: an assessment of sex differentials in mortality in India. *Int J Popul Stud* 2016;**2**. doi:10.18063/IJPS.2016.01.005
- 13 13 Dicker D, Nguyen G, Abate D, *et al.* Global, regional, and national age-sex-specific mortality and life expectancy, 1950-2017: a systematic analysis for the Global Burden of Disease Study 2017. *Lancet* 2018;**392**:1684–735. doi:10.1016/S0140-6736(18)31891-9
- 14 14 Bassett MT, Krieger N. Social class and black-white differences in breast cancer survival. *Am J Public Health* 1986;**76**:1400–3. doi:10.2105/ajph.76.12.1400
- 15 15 Keil JE, Sutherland SE, Knapp RG, *et al.* Does equal socioeconomic status in black and white men mean equal risk of mortality? *Am J Public Health* 1992;**82**:1133–6. doi:10.2105/ajph.82.8.1133
- 16 16 Hummer RA, Rogers RG, Eberstein IW. Sociodemographic Differentials in Adult Mortality: A Review of Analytic Approaches. *Popul Dev Rev* 1998;**24**:553–78. doi:10.2307/2808154
- 17 17 Wagstaff A. Socioeconomic inequalities in child mortality: comparisons across nine developing countries. *Bull World Health Organ* 2000;**78**:19–29.
- 18 18 Dowd K, Blake D, Cairns AJG. Facing up to uncertain life expectancy: The longevity fan charts. *Demography* 2010;**47**:67–78. doi:10.1353/dem.0.0083
- 19 19 Singh A, Pathak PK, Chauhan RK, *et al.* Infant and Child Mortality in India in the Last Two Decades: A Geospatial Analysis. *PLoS One* 2011;**6**:e26856.<https://doi.org/10.1371/journal.pone.0026856>
- 20 20 Eggleston KN, Fuchs VR. The New Demographic Transition: Most Gains in Life Expectancy Now Realized Late in Life. *J Econ Perspect* 2012;**26**:137–56. doi:10.1257/jep.26.3.137
- 21 21 Fenelon A. Geographic Divergence in Mortality in the United States. *Popul Dev Rev* 2013;**39**:611–34. doi:10.1111/j.1728-4457.2013.00630.x
- 22 22 Gordon E-S, Haklai Z, Meron J, *et al.* Regional variations in mortality and causes of death in Israel, 2009-2013. *Isr J Health Policy Res* 2017;**6**:39. doi:10.1186/s13584-017-0164-1

- 1  
2  
3 23 Liu L, Chu Y, Oza S, *et al.* National, regional, and state-level all-cause and cause-specific  
4 under-5 mortality in India in 2000–15: a systematic analysis with implications for the  
5 Sustainable Development Goals. *Lancet Glob Heal* 2019;**7**:e721–34. doi:10.1016/S2214-  
6 109X(19)30080-4  
7
- 8 24 Montgomery AL, Ram U, Kumar R, *et al.* Maternal mortality in India: causes and healthcare  
9 service use based on a nationally representative survey. *PLoS One* 2014;**9**:e83331–e83331.  
10 doi:10.1371/journal.pone.0083331  
11
- 12 25 Knudson A, Meit M, Tanenbaum E, *et al.* Exploring rural and urban mortality differences.  
13 *Bethesda Rural Heal Reform Policy Res Cent* 2015.  
14
- 15 26 Saikia N. Trends in Mortality Differentials in India. 2016. 55–71. doi:10.1007/978-3-319-  
16 24783-0\_3  
17
- 18 27 Chakraborti B. Rural-urban mortality differential in Indian states: effect of environmental  
19 inequality and associated factors. *Rural Demogr* 1982;**9**:1–6.  
20
- 21 28 Hartley D. Rural health disparities, population health, and rural culture. *Am J Public Health*  
22 2004;**94**:1675–8. doi:10.2105/ajph.94.10.1675  
23
- 24 29 Singh GK, Siahpush M. Widening Rural–Urban Disparities in Life Expectancy, U.S., 1969–  
25 2009. *Am J Prev Med* 2014;**46**:e19–29. doi:https://doi.org/10.1016/j.amepre.2013.10.017  
26
- 27 30 Shah VR, Christian DS, Prajapati AC, *et al.* Quality of life among elderly population residing  
28 in urban field practice area of a tertiary care institute of Ahmedabad city, Gujarat. *J Fam Med*  
29 *Prim care* 2017;**6**:101–5. doi:10.4103/2249-4863.214965  
30
- 31 31 Krishnaji N, James KS. Gender differentials in adult mortality: with notes on rural-urban  
32 contrasts. *Econ Polit Wkly* 2002;:4633–7.  
33
- 34 32 Saikia N, Jasilionis D, Ram F, *et al.* Trends in geographical mortality differentials in India.  
35 *Rostock Max Planck Inst Demogr Res* 2009.  
36
- 37 33 Ram U, Jha P, Gerland P, *et al.* Age-specific and sex-specific adult mortality risk in India in  
38 2014: analysis of 0· 27 million nationally surveyed deaths and demographic estimates from  
39 597 districts. *Lancet Glob Heal* 2015;**3**:e767–75.  
40
- 41 34 Kannan KP, Thankappan KR, Ramankutty V, *et al.* Kerala: a unique model of development.  
42 *Health Millions* 1991;**17**:30–3.  
43
- 44 35 Pal P, Ghosh J. Inequality in India: A survey of recent trends. 2007.  
45
- 46 36 Sen A. Development as freedom (1999). *Roberts, JT, Hite, AB Chorev, N Glob Dev Read*  
47 *Perspect Dev Glob Chang* 2014;**2**:525–47.  
48
- 49 37 Wang H, Abajobir AA, Abate KH, *et al.* Global, regional, and national under-5 mortality,  
50 adult mortality, age-specific mortality, and life expectancy, 1970–2016: a systematic analysis  
51 for the Global Burden of Disease Study 2016. *Lancet* 2017;**390**:1084–150. doi:10.1016/S0140-  
52 6736(17)31833-0  
53
- 54 38 Mohindra KS, Haddad S, Narayana D. Women’s health in a rural community in Kerala, India:  
55 do caste and socioeconomic position matter? *J Epidemiol Community Health* 2006;**60**:1020 LP  
56 – 1026. doi:10.1136/jech.2006.047647  
57  
58  
59  
60

- 1  
2  
3 39 Subramanian S V, Ackerson LK, Subramanyam MA, *et al.* Health Inequalities in India: The  
4 Axes of Stratification. *Brown J World Aff* 2008;**14**:127–  
5 38.<http://www.jstor.org/stable/24590719>  
6
- 7 40 Vart P, Jaglan A, Shafique K. Caste-based social inequalities and childhood anemia in India:  
8 results from the National Family Health Survey (NFHS) 2005–2006. *BMC Public Health*  
9 2015;**15**:537. doi:10.1186/s12889-015-1881-4  
10
- 11 41 Mackenbach JP, Kunst AE. Measuring the magnitude of socio-economic inequalities in health:  
12 An overview of available measures illustrated with two examples from Europe. *Soc Sci Med*  
13 1997;**44**:757–71. doi:[https://doi.org/10.1016/S0277-9536\(96\)00073-1](https://doi.org/10.1016/S0277-9536(96)00073-1)  
14
- 15 42 Kakwani N, Wagstaff A, Van Doorslaer E. Socioeconomic inequalities in health:  
16 measurement, computation, and statistical inference. *J Econom* 1997;**77**:87–103.  
17
- 18 43 Burström K, Johannesson M, Diderichsen F. Increasing socio-economic inequalities in life  
19 expectancy and QALYs in Sweden 1980–1997. *Health Econ* 2005;**14**:831–50.  
20 doi:10.1002/hec.977  
21
- 22 44 Subramanian S V, Smith GD, Subramanyam M. Indigenous Health and Socioeconomic Status  
23 in India. *PLOS Med* 2006;**3**:e421.<https://doi.org/10.1371/journal.pmed.0030421>  
24
- 25 45 Lorant V, Croux C, Weich S, *et al.* Depression and socio-economic risk factors: 7-year  
26 longitudinal population study. *Br J Psychiatry* 2007;**190**:293–8. doi:DOI:  
27 10.1192/bjp.bp.105.020040  
28
- 29 46 Malhotra C, Do YK. Socio-economic disparities in health system responsiveness in India.  
30 *Health Policy Plan* 2013;**28**:197–205. doi:10.1093/heapol/czs051  
31
- 32 47 Asaria M, Mazumdar S, Chowdhury S, *et al.* Socioeconomic inequality in life expectancy in  
33 India. *BMJ Glob Heal* 2019;**4**:e001445.  
34
- 35 48 Mohanty SK, Ram F. Life Expectancy At Birth Among Social and Economic Groups in India.  
36 IIPS Res. Br. 2010.[http://iipsindia.org/pdf/RB-13\\_file\\_for\\_uploading.pdf](http://iipsindia.org/pdf/RB-13_file_for_uploading.pdf) (accessed 1 Nov  
37 2016).  
38
- 39 49 Coffey D, Deshpande A, Hammer J, *et al.* Local Social Inequality, Economic Inequality, and  
40 Disparities in Child Height in India. *Demography* 2019;**56**:1427–52. doi:10.1007/s13524-019-  
41 00794-2  
42
- 43 50 LoPalo M, Coffey D, Spears D. The Consequences of Social Inequality for the Health and  
44 Development of India's Children: The Case of Caste, Sanitation, and Child Height. *Soc Justice*  
45 *Res* 2019;**32**:239–54. doi:10.1007/s11211-019-00323-x  
46
- 47 51 Patel P, Das M, Das U. The perceptions, health-seeking behaviours and access of Scheduled  
48 Caste women to maternal health services in Bihar, India. *Reprod Health Matters* 2018;**26**:114–  
49 25.  
50
- 51 52 Acharya SS. Health Equity in India: An Examination Through the Lens of Social Exclusion. *J*  
52 *Soc Incl Stud* 2018;**4**:104–30. doi:10.1177/2394481118774489  
53
- 54 53 Khubchandani J, Soni A, Fahey N, *et al.* Caste matters: perceived discrimination among  
55 women in rural India. *Arch Womens Ment Health* 2018;**21**:163–70.  
56
- 57 54 George S. *Caste and Care: Is Indian Healthcare Delivery System Favourable for Dalits?*  
58  
59  
60

- Institute for Social and Economic Change 2015.
- 55 Malhotra R, Rajan I, Syam S, *et al.* SOCIAL GROUP DISPARITIES IN LIFE EXPECTANCY AND ACTIVE LIFE EXPECTANCY AMONG OLDER PERSONS IN KERALA, INDIA. *Innov Aging* 2018;**2**:230. doi:10.1093/geroni/igy023.855
- 56 Guillot M, Gavrilova N, Torgasheva L, *et al.* Divergent paths for adult mortality in Russia and Central Asia: evidence from Kyrgyzstan. *PLoS One* 2013;**8**:e75314.
- 57 Chiang CL. On Constructing Current Life Tables. *J Am Stat Assoc* 1972;**67**:538–41. doi:10.1080/01621459.1972.10481245
- 58 Schoen R. Calculating Life Tables by Estimating Chiang's a From Observed Rates. *Demography* 1978;**15**:625–35. doi:10.2307/2061212
- 59 Subramanian S V, Nandy S, Irving M, *et al.* The Mortality Divide in India: The Differential Contributions of Gender, Caste, and Standard of Living Across the Life Course. *Am J Public Health* 2006;**96**:818–25. doi:10.2105/AJPH.2004.060103
- 60 Borooah VK, Dubey A, Iyer S. The Effectiveness of Jobs Reservation: Caste, Religion and Economic Status in India. *Dev Change* 2007;**38**:423–45. doi:10.1111/j.1467-7660.2007.00418.x
- 61 Vijayanath V, Anitha MR, Vijayamahantesh SN, *et al.* Caste and health in Indian Scenario. *J Punjab Acad Forensic Med Toxicol* 2010;**10**:42–4.
- 62 Saikia N, Bora JK. Does Increasing Longevity Lead Increasing Disability? Evidence from Indian States. *Soc Chang Dev* 2016;**13**.
- 63 IIPS, ORC Macro. National Family Health Survey (NFHS-3) 2005-2006. Mumbai: 2007.
- 64 Norheim OF, Jha P, Admasu K, *et al.* Avoiding 40% of the premature deaths in each country, 2010–30: review of national mortality trends to help quantify the UN Sustainable Development Goal for health. *Lancet* 2015;**385**:239–52.
- 65 Liu L, Hill K, Oza S, *et al.* Levels and causes of mortality under age five years. *Int Bank Reconstr Dev World Bank Reprod Matern newborn, child Heal Dis Control priorities* 2015;**2**:71–83.
- 66 Masquelier B, Hug L, Sharrow D, *et al.* Global, regional, and national mortality trends in older children and young adolescents (5–14 years) from 1990 to 2016: an analysis of empirical data. *Lancet Glob Heal* 2018;**6**:e1087–99. doi:10.1016/S2214-109X(18)30353-X

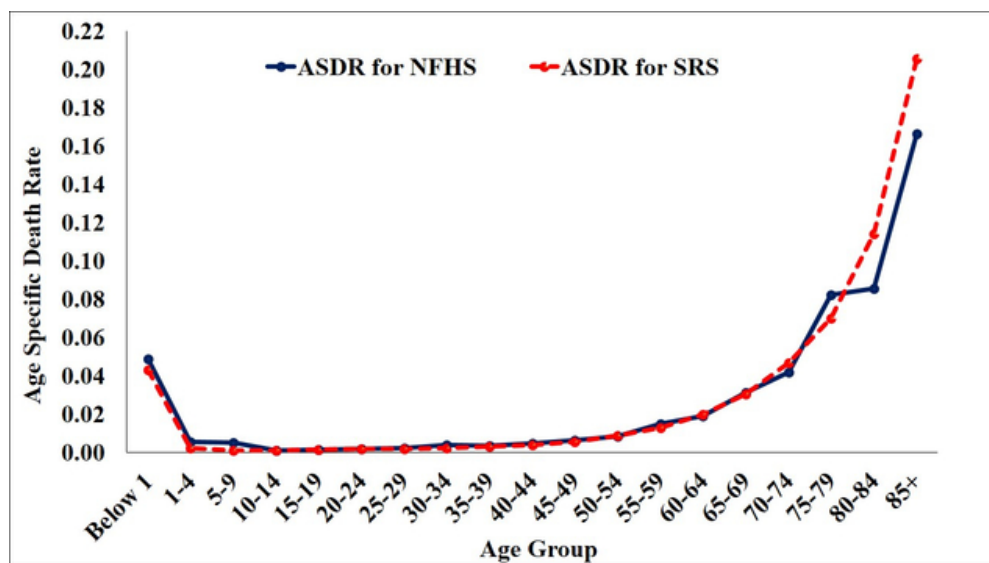

Figure 1: Age specific death rate from NFHS-4 and SRS, 2011-2015, in India.

54x30mm (300 x 300 DPI)

1  
2  
3  
4  
5  
6  
7  
8  
9  
10  
11  
12  
13  
14  
15  
16  
17  
18  
19  
20  
21  
22  
23  
24  
25  
26  
27  
28  
29  
30  
31  
32  
33  
34  
35  
36  
37  
38  
39  
40  
41  
42  
43  
44  
45  
46  
47  
48  
49  
50  
51  
52  
53  
54  
55  
56  
57  
58  
59  
60

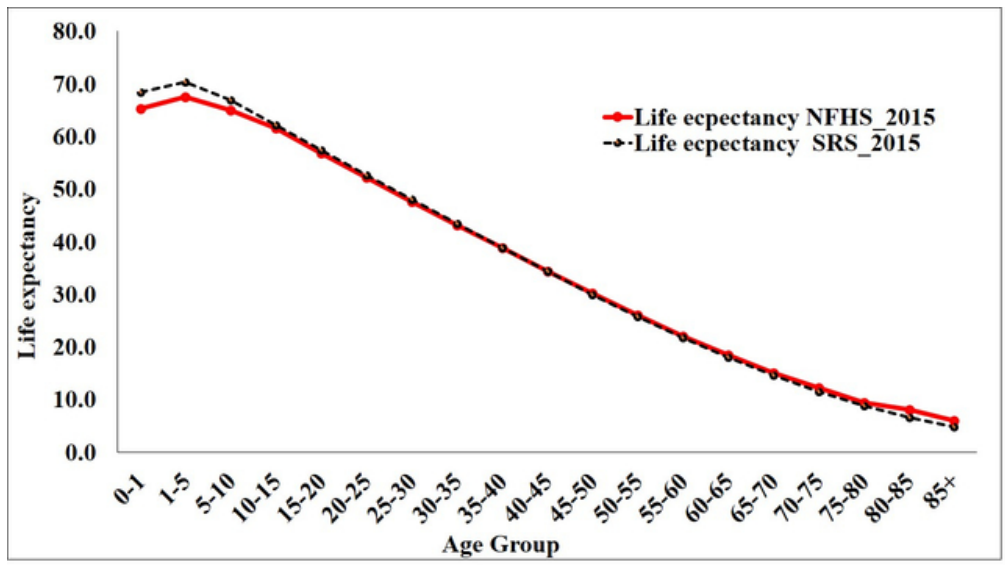

Figure 2: Estimated life expectancy at birth from NFHS-4, 2015-16 and SRS, 2011-15 in India.

54x30mm (300 x 300 DPI)

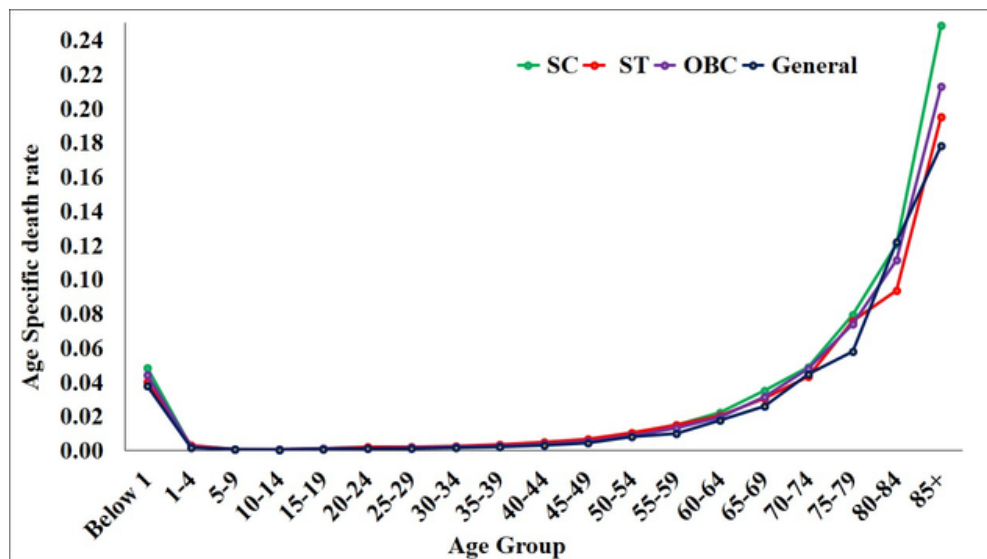

Figure 3: Adjusted Age Specific death rate across caste groups in India 2015-16.

54x30mm (300 x 300 DPI)



1  
2  
3  
4  
5  
6  
7  
8  
9  
10  
11  
12  
13  
14  
15  
16  
17  
18  
19  
20  
21  
22  
23  
24  
25  
26  
27  
28  
29  
30  
31  
32  
33  
34  
35  
36  
37  
38  
39  
40  
41  
42  
43  
44  
45  
46  
47  
48  
49  
50  
51  
52  
53  
54  
55  
56  
57  
58  
59  
60

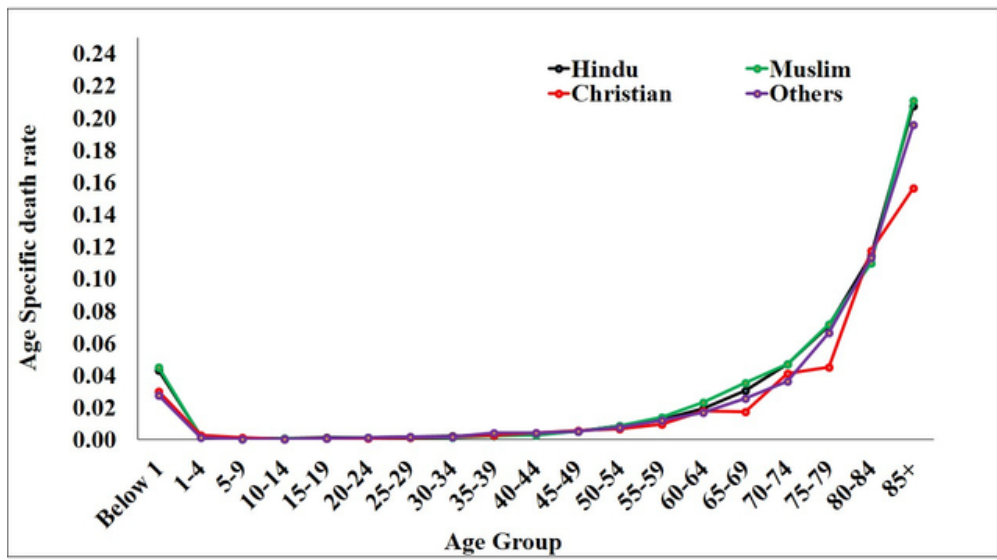

Figure 4: Age Specific death rate by Religions in India.

54x30mm (300 x 300 DPI)

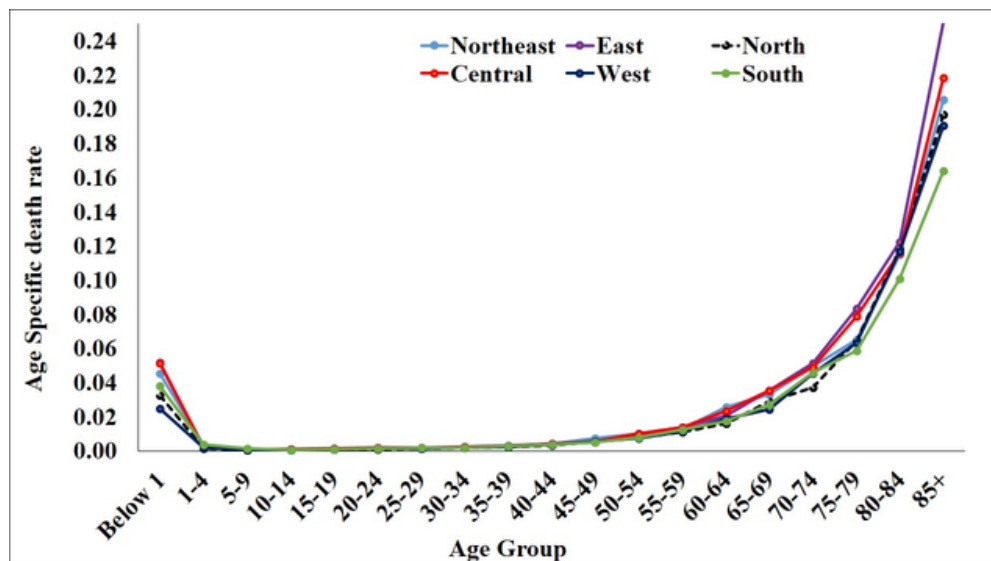

Figure 5: Age Specific death rate across Regions of India 2015-16.

54x30mm (300 x 300 DPI)

# BMJ Open

## Caste, religion and regional differentials in life expectancy at birth in India

|                                 |                                                                                                                                                                                        |
|---------------------------------|----------------------------------------------------------------------------------------------------------------------------------------------------------------------------------------|
| Journal:                        | <i>BMJ Open</i>                                                                                                                                                                        |
| Manuscript ID                   | bmjopen-2019-035392.R1                                                                                                                                                                 |
| Article Type:                   | Original research                                                                                                                                                                      |
| Date Submitted by the Author:   | 11-Feb-2020                                                                                                                                                                            |
| Complete List of Authors:       | Kumari, Meena; International Institute for Population Sciences, Fertility Studies<br>Mohanty, Sanjay; INTERNATIONAL INSTITUTE FOR POPULATION SCIENCES, DEPARTMENT OF FERTILITY STUDIES |
| <b>Primary Subject Heading</b>: | Public health                                                                                                                                                                          |
| Secondary Subject Heading:      | Global health, Epidemiology                                                                                                                                                            |
| Keywords:                       | PUBLIC HEALTH, EPIDEMIOLOGY, Adult intensive & critical care < INTENSIVE & CRITICAL CARE                                                                                               |
|                                 |                                                                                                                                                                                        |

SCHOLARONE™  
Manuscripts



I, the Submitting Author has the right to grant and does grant on behalf of all authors of the Work (as defined in the below author licence), an exclusive licence and/or a non-exclusive licence for contributions from authors who are: i) UK Crown employees; ii) where BMJ has agreed a CC-BY licence shall apply, and/or iii) in accordance with the terms applicable for US Federal Government officers or employees acting as part of their official duties; on a worldwide, perpetual, irrevocable, royalty-free basis to BMJ Publishing Group Ltd ("BMJ") its licensees and where the relevant Journal is co-owned by BMJ to the co-owners of the Journal, to publish the Work in this journal and any other BMJ products and to exploit all rights, as set out in our [licence](#).

The Submitting Author accepts and understands that any supply made under these terms is made by BMJ to the Submitting Author unless you are acting as an employee on behalf of your employer or a postgraduate student of an affiliated institution which is paying any applicable article publishing charge ("APC") for Open Access articles. Where the Submitting Author wishes to make the Work available on an Open Access basis (and intends to pay the relevant APC), the terms of reuse of such Open Access shall be governed by a Creative Commons licence – details of these licences and which [Creative Commons](#) licence will apply to this Work are set out in our licence referred to above.

Other than as permitted in any relevant BMJ Author's Self Archiving Policies, I confirm this Work has not been accepted for publication elsewhere, is not being considered for publication elsewhere and does not duplicate material already published. I confirm all authors consent to publication of this Work and authorise the granting of this licence.

# Caste, religion and regional differentials in life expectancy at birth in India

Meena Kumari, International Institute for Population Sciences (IIPS), Govandi Station Road, Deonar, Mumbai-400088

Email: meenaiips@gmail.com

Prof. Sanjay Kumar Mohanty, Department of Fertility Studies, International Institute for Population Sciences (IIPS) Mumbai-400088, India

Email: sanjayiips@yahoo.co.in

## **Word Count: 3291**

**Keywords:** Age-specific death rate, Life expectancy, Adult mortality, Premature mortality, Caste, Religion and Region

**Objective:** Though estimates of longevity are available by states, age, sex and place of residence in India, disaggregated estimates by social and economic groups are limited. This study, estimates the life expectancy at birth and premature mortality by caste, religion and regions of India.

**Design:** This study primarily used data from the National Family Health Survey (NFHS-4), 2015-2016 and the Sample Registration System (SRS), 2011-2015. The NFHS-4 has been the largest ever demographic and health survey covering 601,509 households and 811,808 individuals across all states and union territories in India.

**Measures:** The abridged life table is constructed to estimate the life expectancy at birth, adult mortality ( ${}_{15}q_{59}$ ) and premature mortality ( ${}_{0}q_{70}$ ) by caste, religion and region.

**Results:** Life expectancy at birth was estimated at 66.4 years for Scheduled Castes (SC), 67.2 years for Scheduled Tribes (ST), 68.1 years for Other Backward Classes (OBC) and 70.4 years for Others. Life expectancy at birth was higher among females than among males across social groups in India. It was higher among Christians (71.3 years) followed by Muslims (68.3 years) and Hindus (68.1 years). Premature mortality was higher among SC (0.34), followed by ST (0.33), OBC (0.30) and Others (0.26). The regional variation in life expectancy by age and sex is large.

**Conclusion:** In India, social and religious differentials in life expectancy by sex are large and premature mortality and adult mortality are also high across caste and religious groups.

## **Strengths and Limitations of the Study**

- This is the first ever study that provides estimates of life expectancy, by caste, religion and region in India.
- It provides estimates of premature and adult mortality across social groups and regions in India. Sex differentials in life expectancy and premature mortality are large across social groups and regions.
- Disease burden, disability and cause of premature mortality have not been explored in this study.

- State specific estimates of life expectancy, premature mortality have not been estimated due to inadequate sample size.
- Estimates of mortality and longevity are not linked to socio-economic status in India.

## Introduction

Life expectancy at birth is one of the most frequently used summary measures of health. It is used to quantify the health dimension of the human development index [1]. Globally, life expectancy at birth is converging among and within countries [2–4]. Life expectancy at birth, infant mortality rate, under-five mortality rate and utilisation of basic health services are converging too [5–7]. Though the sex differential in life expectancy at birth has been narrowing down, findings from a large number of studies in developing countries suggest that females are disadvantaged in health and health care utilization [8–13].

Though life expectancy at birth has been rising in almost all societies, mortality differences exist within, as well as between, population sub-groups within national and regional boundaries [14–23]. Regional disparity in mortality is associated with socio-economic well-being and access to health care [24–26]. Conventionally, those with an urban residence and the economically and socially better off tend to have lower mortality and higher longevity [27–30].

India with a population of 1.35 billion in 2018 is experiencing significant improvement in health indicators. Life expectancy at birth has increased from 58.7 years in 1990 to 68.30 years in 2015 (RGI). The state variations in life expectancy have been narrowing down over the years. Although India has witnessed spectacular improvement in mortality, the changes in mortality conditions across the states have been different [26]. There was a strong North-South gradient across the states, with great variations in the level and the pace of mortality reduction over time [31–33]. For instance, life expectancy was higher in Kerala than in Uttar Pradesh in India [34–37]; adult mortality and premature deaths were also high [33]. The national and state average in life expectancy conceal large variation among states and social groups in India.

Caste and religion are important determinants of health, education, employment, social and economic outcomes in India. Caste and religion are often used as key social variables and given priority in national and state policies. The caste structure is also said to be associated with the economic well-being of the household. For the benefit of welfare schemes in India, the population of India is classified into four caste groups, namely Scheduled Castes (SC), Scheduled Tribes (ST), Other Backward Classes (OBC) and Others. The ST population, accounting for 8.6% of the total population is the most deprived followed by SCs. A large number of studies have examined the caste differentials in health and health-care in India and its states, and found that the SC and ST population have poor health [38–40]. However, studies suggest that the increasing socio-economic inequality over the years has led to poor health outcomes among population sub-groups in the country [41–47].

1  
2  
3 The Sample Registration System (SRS) provides regular estimates of life expectancy at birth  
4 and age-specific death rate for major states, by sex and place of residence. However, such  
5 estimates are not available for social groups such as caste and religion and by economic groups.  
6 To our knowledge, there were two studies that provided the estimates of life expectancy by  
7 social group/economic group. Mohanty and Ram (2010) estimated life expectancy at birth  
8 among the social groups using NFHS-2 and NFHS-3 data and found that life expectancy at  
9 birth is similar among the poor across caste groups [48]. Recently Asaria (2019) has provided  
10 estimates of life expectancy at birth across wealth quintiles using NFHS-4 data and found that  
11 life expectancy at birth among the poorest wealth quintile was 65.1 years compared to 72.7  
12 years in the richest wealth quintile. Patel (2018) explains that SC women may be inequitably  
13 served by maternal health services and in some cases, even face specific discrimination. Low  
14 health status is observed among poor, female, rural and specific minority groups of Scheduled  
15 Tribes and Scheduled Castes [49–52]. In comparison to the General castes, lower caste (OBC,  
16 SC/ST) women were more likely to experience discrimination in rural western India [53].  
17 Lower caste women reported a higher prevalence of poorer health than women of higher castes  
18 [38,54]. At age 60, life expectancy, active life expectancy and inactive life expectancy  
19 estimates were significantly higher, by 2.3, 1.9 and 0.4 years, for older persons in the General  
20 castes group versus those in the SC/ST/OBC groups respectively [46,55]. Many studies support  
21 the finding that life expectancy was lower in the Central region than in other regions [40,56].  
22  
23  
24  
25  
26  
27  
28  
29

30 The national average conceal large variations across population sub-groups and by socio-  
31 economic characteristics. This is the first ever study that estimates the life expectancy and  
32 mortality pattern by caste, religion, region and sex in India.  
33  
34

### 35 Data Sources

36  
37 Data from the National Family Health Survey (NFHS-4), 2015-16 and the Sample Registration  
38 System (SRS), 2011-2015 have been used. The National Family Health Surveys (NFHSs) are  
39 large-scale, multi-round surveys, conducted in a representative sample of households  
40 throughout India. The first round of NFHS was conducted in 1992-93 and the fourth round in  
41 2015-16. The NFHS-4 covered 601,509 households and 811,808 individuals. The NFHS  
42 provides reliable estimates of fertility, child mortality, family planning, child nutritional status  
43 and childhood morbidity for the country. With regard to mortality, NFHS 1, 2 and 3 were  
44 intended to provide reliable estimates of infant and child mortality. However, in NFHS-4, an  
45 attempt was made to capture overall mortality and data were collected at the national and  
46 district levels. It has the distinction of the largest ever population based health survey in the  
47 country.  
48  
49  
50  
51

52 Questions were asked on the death of any members of the household in a three-year reference  
53 period. A total of 74,945 deaths was recorded during the survey. Along with death records,  
54 data on sex, place of residence, caste, religion and household's assets and amenities were  
55 collected. Caste data were collected for Scheduled Castes (SC), Scheduled Tribes (ST), Other  
56 Backward Classes (OBC) and Others. Generally, the STs are considered to be socially and  
57 economically poorer, followed by SCs and OBCs. Many central and state government welfare  
58 schemes have been specifically designed for the welfare of the population. Similarly, data on  
59  
60

religion were collected in seven groups. These are Hindu, Muslim, Christian, Sikh, Buddhist, Jain, Other religion and Religion not stated. We have combined Sikh, Buddhist, Jain, Other religion and Religion not stated groups owing to sample size constraints. The ASDR from SRS is used to compare the mortality rate across age groups.

### Methods:

The SRS data do not provide information on death by socio-economic status (SES). The advantages of using NFHS data is the use of its death statistics by socio-economic characteristics. In the NFHS-4, 0.6 per cent (479) of 74,945 deaths were found missing for one or more socio-economic status (SES). The missing information on SES for age at death were adjusted.

The following steps were used in adjusting missing cases, computing the Age-specific Death Rate (ASDR), life expectancy at birth, adult mortality ( $_{15}q_{59}$ ) and premature mortality ( $_{0}q_{70}$ ) by caste, religion and region.

1. Adjustment of Missing Death cases: The cases with missing information on SES for age at death were inflated by  $100/100-x$  for each age group [47].
2. A total of 479 cases was found missing for some basic variables like age, sex and other SES characteristics. We have distributed 479 cases equally in each age group.
3. Computing Age-specific Death Rate (ASDR): The number of age-specific deaths were divided by 3 to estimate the annual death rate.
4. Estimation of life expectancy using abridged life table: Life expectancy at birth was computed using age-specific death and midyear population from the NFHS-4 life table approach.
5. To minimize the relative difference between the death rates from NFHS and SRS and make them comparable, the adjustment factor was computed. The adjustment factor is defined as the ratio of mortality rates obtained from SRS to mortality rates estimated from NFHS-4 and was computed for each age group, place of residence and sex. The adjustment factor was multiplied by the age-specific death rate computed using NFHS-4 data to make it equivalent to SRS rates [47].
6. The abridged life table is constructed to estimate life expectancy at birth, adult mortality ( $_{15}q_{59}$ ) and premature mortality ( $_{0}q_{70}$ ) by caste, religion and region. Premature mortality is defined as any death under 70 years of age. The mathematical form of Premature ( $_{0}q_{70}$ ) =  $\frac{l_0 - l_{70}}{l_0}$ ; and Mortality in working age ( $_{15}q_{59}$ ) =  $\frac{l_{15} - l_{59}}{l_{15}}$  [57].

Mathematically

$$A_{0-1} (\text{Male, Female, Total}) = \frac{M_{0-1}^{SRS} (\text{Male, Female, Total})}{M_{0-1}^{NFHS} (\text{Male, Female, Total})} \text{-----} (1)$$

$$A_{1-4} (\text{Male, Female, Total}) = \frac{M_{1-4}^{SRS} (\text{Male, Female, Total})}{M_{1-4}^{NFHS} (\text{Male, Female, Total})} \text{-----} (2)$$

.

.



$$A_{85+ (Male, Female, Total)} = \frac{M_{85+ (Male, Female, Total)}^{SRS}}{M_{85+ (Male, Female, Total)}^{NFHS}} \text{-----} (3)$$

The above computed adjustment factors for each group 0-5, 5-10 ... 80-85 are then used to estimate the mortality rate for each age group as follows:

$$M_{0-1 (Male, Female, Total)}^{SRS} = A_{0-1 (Male, Female, Total)} * M_{0-1 (Male, Female, Total)}^{NFHS} \text{-----} (4)$$

$$M_{1-4 (Male, Female, Total)}^{SRS} = A_{1-4 (Male, Female, Total)} * M_{1-4 (Male, Female, Total)}^{NFHS} \text{-----} (5)$$

$$M_{85+ (Male, Female, Total)}^{SRS} = A_{85+ (Male, Female, Total)} * M_{85+ (Male, Female, Total)}^{NFHS} \text{-----} (6)$$

In this calculation, ‘*M*’ signifies the mortality rate for the given subgroup from the National Family Health Survey (NFHS) and Sample Registration System (SRS) data set and ‘*A*’ signifies the subgroup specific adjustment factor for each age group. We assumed this adjustment factor to be constant across caste, religion and regional differentials within this subgroup.

Finally, the age-specific death rate was used to compute life expectancy at birth by sex, caste, religion and region using the Chiang method. In the Chiang method the  ${}_n a_x$  is estimated by the average number of years lived in the  $x$  to  $x + n$  age interval by those dying in the interval [57–59].

### Patient and public involvement

Patients and the public were not involved. The paper uses secondary data available for public use.

### Results

**Figure 1** plots the age-specific death rate (ASDR) from SRS and NFHS in a five-year age group. The life expectancy at birth was 68.3 years from SRS and 65.3 years from NFHS – a difference of 1.05 years. In general, the ASDRs is close from both the sources and the ASDRs overlap in a large number of age groups. While keeping the SRS mortality as standard, we have used the adjustment factor for mortality by five-year age groups. The overall age-specific death rate at birth was estimated at 0.048 from NFHS 4 compared to 0.043 from SRS. **Table 1** presents the numerical value of ASDR from SRS and NFHS by a five-year age group and the adjustment factors. **Figure 2** presents the life expectancy at various ages. Results suggest that life-expectancy varies with different social characteristics; caste, religion and region in India.

1  
2  
3 **Figure 3** summarizes the estimated ASDR by caste in India. The ASDR was higher among  
4 SCs (0.048) followed by OBCs (0.044), STs (0.040) and then Others (0.038) at below age one.  
5 Similarly, at later ages, the curve shows a skewed pattern in each category. **Figure 4** presents  
6 the age-specific death rate by religion. The ASDR was higher among Muslims (0.045) than  
7 among Others (0.027) for age below one. Among population aged 50 years, the ASDR was  
8 higher for Hindus than for Muslims. But at later ages, the ASDR was higher among Muslims  
9 followed by Hindus, Others and Christians in India.  
10  
11  
12

13 **Figure 5** shows that the ASDR for those below one year, was higher in the Eastern region  
14 (0.052) followed by the Western region (0.025). The death rate among children aged 1-9 years  
15 was higher in the Southern than in the Northern regions (0.004 vs. 0.001). The death rate was  
16 almost similar between age groups 10-34. The death rate for population in the age group 65-  
17 69 was higher in the Eastern region than in the Western region (0.035 versus 0.024). The  
18 variations were visible at age below one and in the 1-4 age group and showed a gap amongst  
19 the population of age-groups 60-85.  
20  
21  
22

23 The life expectancy at birth varies from four years across different caste groups in India (**Table**  
24 **2**). The life expectancy at birth was estimated at 66.4 years for Scheduled Castes, 67.2 years  
25 for Scheduled Tribes, 68.1 years for OBCs and 70.4 years for Others. Females had a higher life  
26 expectancy at birth compared to males and this gap remains consistent across all the social  
27 groups. However, this gap decreases at the onset of elderly age (60 years) and ranges from 1.2  
28 to 2.8 years across social groups. The life expectancy at age 60 was 17 years for SCs, 17.8  
29 years for OBCs, 18.1 years for STs and 18.8 years for Others. These findings are consistent  
30 with those of other studies [8,9]. Women had a higher life expectancy than men across different  
31 caste categories in India.  
32  
33  
34

35 **Table 3** summarizes religious differentials in life expectancy. It suggests that the life  
36 expectancy at birth was higher among Christians (71.3 years) compared to Muslims (68.3  
37 years) and Hindus (68.1 years). The gap in life expectancy between male and female was  
38 highest among Christians (5 years), followed by Others (4 years), Hindus (3 years) and  
39 Muslims (2 years). Female life expectancy at birth was highest among Christians (73.8 years)  
40 followed by Others (72.8 years) and Hindus (69.9 years) but it was lowest among Muslims  
41 (69.3). The sex differential in life expectancy at age 20 was higher among Christians followed  
42 by Hindus, Others and Muslims.  
43  
44  
45  
46  
47

48 **Table 4** presents the life expectancy at birth by region in India, which ranges from 67–71 years.  
49 With a difference of more than 4 years, the life expectancy was as low as 66.6 years in the  
50 Central region compared to 70.9 years in the Western region. However, the life expectancy at  
51 age one was 72.0 years in the Northern region and 68.9 years in the Northeast – a difference of  
52 3.1 years. Similarly, among males, the life expectancy at birth ranged from 64.9 years in the  
53 Northeast to 68.8 years in the Western region – a difference of 3.9 years. At age one, the gap in  
54 life expectancy by sex was as high as 6 years in the South followed by the West (4.4 years),  
55 North (4.3 years) and Northeast (4.2 years). Below age one, the gap in life expectancy by sex  
56 was lower in the Eastern region. Similarly, life expectancy at birth for females was higher in  
57  
58  
59  
60

1  
2  
3 the Western region (73.2 years) and lower in the Eastern region (67.1 years), a difference of  
4 6.1 years.  
5  
6

7 The probability of death for adults (15-59 years) and premature mortality (before at age 70)  
8 were estimated by sex, caste, region and religion. Results were presented in Table 5 and 6.  
9 **Table 5** shows that the level of adult mortality is higher among males than among females in  
10 India. Individuals belonging to SCs have a higher probability of adult death (0.144) than Others  
11 caste groups (0.108). Similarly, by religion, the probability of death among Hindus was 0.128  
12 compared to 0.127 among Others, followed by 0.114 among Christians and 0.114 among  
13 Muslims. By region, the probability of adult death in the North-eastern region was higher  
14 (0.147) than that in the Western regions (0.113). Similarly, premature mortality by caste group  
15 revealed that individuals belonging to SCs had a higher probability of premature mortality than  
16 General castes (0.335 versus 0.260). Premature mortality was also analyzed by religions and  
17 regions in India and was found to vary. For instance, Muslims (0.304) had a higher premature  
18 mortality than Christians (0.265). By region, the probability of premature mortality in the  
19 Northeast was 0.341 followed by Central 0.330, East 0.318, Southern 0.287, Western 0.265  
20 and Northern regions 0.258. **Table 6** reveals that the adult mortality and premature mortality  
21 was higher among males than among females in each social strata; caste, religion, region in  
22 India. Premature mortality among males and females was high among STs (0.125) followed by  
23 SCs (0.097), OBCs (0.069) and Others (0.068). Similarly, for religion, premature mortality gap  
24 was higher among Christians than among Muslims. Regional variations shows that the gap was  
25 wider in the South than in other regions.  
26  
27  
28  
29  
30  
31  
32

33 Prior studies suggests that caste and religion differentials show inequality in mortality across  
34 populations, subgroups and geographic areas [44,59,60]. This study addresses social disparities  
35 in health and provides evidence for the gap in life expectancy and premature mortality across  
36 different social groups in India.  
37  
38

### 39 Discussion

40 Life expectancy at birth is widely used as a summary measure of health. Disaggregated  
41 estimates of life expectancy are limited in many developing countries including India. This is  
42 the first ever study that estimates life expectancy at birth and premature mortality by social  
43 groups such as caste, religion and region in India. The followings are salient findings of this  
44 study.  
45  
46  
47

48 **First**, life expectancy at birth varies largely across caste, religion and region in India. Life  
49 expectancy at birth among SCs was lowest, followed by STs, OBCs and Others. **Second**, the  
50 caste and religion differentials in life expectancy were not only observed at birth but also across  
51 the ages. Life expectancy at birth was highest among Christians followed by Others, Muslims  
52 and Hindus. The gap in life expectancy at birth between Christians and Hindus was 3 years. It  
53 was low in the Central region compared to the Western region at age below one year. **Third**,  
54 we found consistent sex differentials in life expectancy across caste and religious groups. Life  
55 expectancy at birth for women was higher for men across social groups in both rural and urban  
56 areas. **Fourth**, adult mortality ( $_{15}q_{59}$ ) was highest among SCs and the gap between SCs and  
57 Others was 0.4. However, in the case of religion, the probability of adult death ( $_{15}q_{59}$ ) was  
58  
59  
60

1  
2  
3 higher among Hindus than among Muslims. The probability of death was higher among  
4 Northeast than in the Western region in India. **Fifth**, premature mortality ( ${}_0q_{70}$ ) was highest  
5 among SCs. In the case of religion, premature deaths ( ${}_0q_{70}$ ) among Muslims was higher than  
6 among Christians. By region, premature mortality ( ${}_0q_{70}$ ) in the Northeast was higher than in the  
7 North.  
8  
9

10 We put forward the following explanations. Life expectancy has been explained by a  
11 combination of biological and behavioural factors [47]. The caste system, with its societal  
12 stratification and social restrictions, continues to have a major impact in India [61]. Caste and  
13 religion are inextricably linked to and is a proxy for socio-economic status in India. The poor  
14 socio-economic status (SES) is significantly associated with poor health outcomes and lower  
15 access to health-care facilities. Caste-based exclusion is related to lack of access to services.  
16 Lower accessibility and poorer health statistics are observed among the lower castes in India.  
17 Similarly, gender variations in health are persistent cutting across caste and religion. Though  
18 women are living longer than men, they have higher morbidity and disability at later ages [62].  
19 The average year of disability free life expectancy among females was lower than among male.  
20 Adult mortality risks could be a result of chronic diseases or malnutrition in childhood. Most  
21 of the non-communicable diseases are non-curable but can be controlled with regular treatment.  
22 On the other hand, while the risk of being affected by these life-style conditions is relatively  
23 lower among the poor, once affected, they cannot afford the continued high treatment costs and  
24 so they experience premature death. The findings indicate significant differences in the  
25 population's health across different castes, religions and regions. Hindu children have higher  
26 mortality than Muslim children [63].  
27  
28  
29  
30  
31  
32

33 The reduction of premature mortality, a major public health focus, is one of the UN Sustainable  
34 Development Goals [64]. The Mortality rate has decreased for most age groups from 2000 to  
35 2016, especially for adolescents and young adults in many developed and developing regions,  
36 but remains high among middle aged adults (ages 36-55) and older adults (55 years). However,  
37 premature mortality and adult mortality are still higher among all ethnic groups globally [65–  
38 67].  
39  
40  
41

## 42 **Conclusion**

43  
44 The findings suggest that the mortality differentials are significant across caste, religion and  
45 region in India. Though, female life expectancy at birth is higher for females, they might be  
46 suffering from higher morbidity. Premature mortality is high across caste and religious groups.  
47 Prioritizing reduction of premature mortality, including infant and under-five mortality is  
48 recommended.  
49  
50  
51  
52  
53  
54  
55  
56  
57  
58  
59  
60

**Figure 1: Age-specific Death Rate from NFHS-4 and SRS, 2011-2015 in India**

1  
2  
3  
4  
5 **Figure 2: Estimated life expectancy at birth from NFHS-4, 2015-16 and SRS, 2011-15 in India**  
6  
7

8 **Figure 3: Adjusted Age-specific death rate across caste groups in India 2015-16**  
9

10  
11  
12 **Figure 4: Age-specific death rate by religion in India 2015-16**  
13  
14

15  
16 **Figure 5: Age-specific death rate across regions in India 2015-16**  
17  
18  
19  
20

21 **Table 1: ASDR by five-year age group and estimated life expectancy from NFHS 4 and**  
22 **SRS in India, 2015-16**  
23  
24

| Age Group | ASDR_NFHS | ASDR_SRS | Adjustment Factors | Life Expectancy NFHS_2015 | Life Expectancy SRS_2015 | Adjustment Factors |
|-----------|-----------|----------|--------------------|---------------------------|--------------------------|--------------------|
| 0-1       | 0.0485    | 0.0429   | 0.8846             | 65.3                      | 68.3                     | 1.05               |
| 1-5       | 0.0055    | 0.0022   | 0.4021             | 67.5                      | 70.3                     | 1.04               |
| 5-10      | 0.0049    | 0.0008   | 0.1677             | 65.0                      | 66.9                     | 1.03               |
| 10-15     | 0.0008    | 0.0007   | 0.8716             | 61.5                      | 62.2                     | 1.01               |
| 15-20     | 0.0014    | 0.0011   | 0.7546             | 56.8                      | 57.4                     | 1.01               |
| 20-25     | 0.0018    | 0.0015   | 0.8058             | 52.2                      | 52.7                     | 1.01               |
| 25-30     | 0.0021    | 0.0017   | 0.7782             | 47.6                      | 48.1                     | 1.01               |
| 30-35     | 0.0036    | 0.0020   | 0.5686             | 43.1                      | 43.5                     | 1.01               |
| 35-40     | 0.0032    | 0.0027   | 0.8663             | 38.8                      | 38.9                     | 1.00               |
| 40-45     | 0.0045    | 0.0038   | 0.8263             | 34.4                      | 34.4                     | 1.00               |
| 45-50     | 0.0060    | 0.0054   | 0.8924             | 30.1                      | 30.0                     | 0.99               |
| 50-55     | 0.0083    | 0.0086   | 1.0365             | 26.0                      | 25.7                     | 0.99               |
| 55-60     | 0.0147    | 0.0127   | 0.8627             | 22.0                      | 21.7                     | 0.99               |
| 60-65     | 0.0188    | 0.0196   | 1.0422             | 18.5                      | 18.0                     | 0.97               |
| 65-70     | 0.0311    | 0.0303   | 0.9720             | 15.1                      | 14.6                     | 0.97               |
| 70-75     | 0.0418    | 0.0465   | 1.1126             | 12.2                      | 11.5                     | 0.95               |
| 75-80     | 0.0821    | 0.0700   | 0.8529             | 9.4                       | 8.9                      | 0.94               |
| 80-85     | 0.0856    | 0.1142   | 1.3347             | 8.0                       | 6.6                      | 0.82               |
| 85+       | 0.1664    | 0.2058   | 1.2370             | 6.0                       | 4.9                      | 0.81               |

**Table: 2. Life expectancy by caste and sex in India, 2015-16**

| Age Interval   | SC    |      |        | ST    |      |        | OBC   |      |        | Others |      |        |
|----------------|-------|------|--------|-------|------|--------|-------|------|--------|--------|------|--------|
|                | Total | Male | Female | Total | Male | Female | Total | Male | Female | Total  | Male | Female |
| <b>Below 1</b> | 66.4  | 64.4 | 68.6   | 67.2  | 64.7 | 70.1   | 68.1  | 66.7 | 69.7   | 70.4   | 69.2 | 71.7   |
| <b>1</b>       | 68.7  | 66.7 | 70.9   | 68.9  | 66.6 | 71.6   | 70.2  | 68.6 | 71.9   | 72.1   | 70.7 | 73.6   |
| <b>5</b>       | 65.3  | 63.1 | 67.7   | 65.7  | 63.3 | 68.5   | 66.8  | 65.1 | 68.7   | 68.6   | 67.1 | 70.2   |
| <b>10</b>      | 60.5  | 58.4 | 63.0   | 60.9  | 58.5 | 63.7   | 62.1  | 60.3 | 64.0   | 63.8   | 62.4 | 65.5   |
| <b>15</b>      | 55.8  | 53.6 | 58.2   | 56.2  | 53.8 | 59.0   | 57.3  | 55.5 | 59.2   | 59.0   | 57.5 | 60.6   |
| <b>20</b>      | 51.1  | 49.0 | 53.5   | 51.6  | 49.1 | 54.4   | 52.6  | 50.8 | 54.5   | 54.3   | 52.7 | 55.9   |
| <b>25</b>      | 46.5  | 44.4 | 48.9   | 47.1  | 44.6 | 49.9   | 47.9  | 46.2 | 49.8   | 49.6   | 48.1 | 51.3   |
| <b>30</b>      | 41.9  | 39.9 | 44.3   | 42.6  | 40.1 | 45.3   | 43.3  | 41.6 | 45.2   | 44.9   | 43.4 | 46.5   |
| <b>35</b>      | 37.4  | 35.4 | 39.7   | 38.1  | 35.8 | 40.7   | 38.7  | 37.1 | 40.5   | 40.2   | 38.8 | 41.8   |
| <b>40</b>      | 32.9  | 31.1 | 35.1   | 33.7  | 31.6 | 36.2   | 34.2  | 32.7 | 35.9   | 35.6   | 34.4 | 37.0   |
| <b>45</b>      | 28.7  | 27.0 | 30.6   | 29.5  | 27.4 | 31.8   | 29.8  | 28.4 | 31.3   | 31.1   | 29.9 | 32.4   |
| <b>50</b>      | 24.5  | 23.0 | 26.2   | 25.4  | 23.6 | 27.4   | 25.5  | 24.3 | 26.8   | 26.8   | 25.7 | 27.9   |
| <b>55</b>      | 20.6  | 19.2 | 22.2   | 21.7  | 20.0 | 23.5   | 21.5  | 20.3 | 22.7   | 22.8   | 22.0 | 23.6   |
| <b>60</b>      | 17.0  | 15.8 | 18.3   | 18.1  | 16.8 | 19.6   | 17.8  | 16.8 | 18.8   | 18.8   | 18.2 | 19.4   |
| <b>65</b>      | 13.7  | 12.7 | 14.9   | 14.8  | 13.8 | 15.9   | 14.3  | 13.5 | 15.2   | 15.3   | 14.8 | 15.8   |
| <b>70</b>      | 10.9  | 10.1 | 11.7   | 11.9  | 10.9 | 12.8   | 11.3  | 10.7 | 12.1   | 12.1   | 11.7 | 12.4   |
| <b>75</b>      | 8.2   | 7.5  | 8.9    | 9.1   | 8.4  | 9.9    | 8.7   | 8.2  | 9.3    | 9.5    | 9.2  | 9.7    |
| <b>80</b>      | 6.0   | 5.5  | 6.5    | 7.2   | 6.7  | 7.7    | 6.6   | 6.1  | 7.0    | 6.8    | 6.8  | 6.9    |
| <b>85+</b>     | 4.0   | 3.5  | 4.6    | 5.1   | 4.9  | 5.4    | 4.7   | 4.2  | 5.2    | 5.6    | 6.2  | 5.3    |

**Table 3. Life Expectancy by religion and sex in India, 2015-16**

| Age Interval   | Hindu |      |        | Muslim |      |        | Christian |      |        | Others |      |        |
|----------------|-------|------|--------|--------|------|--------|-----------|------|--------|--------|------|--------|
|                | Total | Male | Female | Total  | Male | Female | Total     | Male | Female | Total  | Male | Female |
| <b>Below 1</b> | 68.1  | 66.5 | 69.9   | 68.3   | 67.3 | 69.3   | 71.3      | 69.1 | 73.8   | 70.6   | 68.7 | 72.8   |
| <b>1</b>       | 70.1  | 68.4 | 72.1   | 70.4   | 69.2 | 71.7   | 72.5      | 70.3 | 75.0   | 71.6   | 69.8 | 73.6   |
| <b>5</b>       | 66.7  | 64.9 | 68.8   | 66.9   | 65.5 | 68.5   | 69.2      | 67.0 | 71.6   | 67.9   | 66.1 | 69.9   |
| <b>10</b>      | 62.0  | 60.2 | 64.1   | 62.1   | 60.7 | 63.7   | 64.6      | 62.4 | 66.9   | 63.1   | 61.3 | 65.1   |
| <b>15</b>      | 57.2  | 55.4 | 59.3   | 57.3   | 55.8 | 58.9   | 59.8      | 57.7 | 62.0   | 58.2   | 56.4 | 60.2   |
| <b>20</b>      | 52.6  | 50.7 | 54.7   | 52.5   | 51.1 | 54.1   | 55.1      | 53.0 | 57.3   | 53.4   | 51.6 | 55.3   |
| <b>25</b>      | 47.9  | 46.1 | 50.0   | 47.9   | 46.5 | 49.4   | 50.3      | 48.1 | 52.6   | 48.7   | 47.0 | 50.5   |
| <b>30</b>      | 43.3  | 41.5 | 45.4   | 43.2   | 41.8 | 44.7   | 45.6      | 43.6 | 47.8   | 44.1   | 42.4 | 45.9   |
| <b>35</b>      | 38.8  | 37.0 | 40.7   | 38.5   | 37.1 | 40.0   | 41.1      | 39.0 | 43.3   | 39.5   | 37.9 | 41.1   |
| <b>40</b>      | 34.3  | 32.7 | 36.1   | 33.9   | 32.6 | 35.3   | 36.6      | 34.7 | 38.5   | 35.2   | 33.6 | 36.9   |
| <b>45</b>      | 29.9  | 28.4 | 31.5   | 29.4   | 28.1 | 30.8   | 32.3      | 30.7 | 34.0   | 31.0   | 29.6 | 32.4   |
| <b>50</b>      | 25.6  | 24.3 | 27.1   | 25.0   | 23.9 | 26.3   | 28.1      | 26.8 | 29.6   | 26.7   | 25.5 | 28.0   |
| <b>55</b>      | 21.7  | 20.5 | 22.9   | 21.1   | 19.9 | 22.3   | 24.0      | 23.0 | 25.0   | 22.7   | 21.6 | 23.8   |
| <b>60</b>      | 17.9  | 17.0 | 18.9   | 17.4   | 16.4 | 18.4   | 20.0      | 19.0 | 21.1   | 19.0   | 18.2 | 19.7   |
| <b>65</b>      | 14.5  | 13.7 | 15.4   | 14.2   | 13.4 | 15.0   | 16.7      | 16.0 | 17.3   | 15.4   | 14.6 | 16.3   |
| <b>70</b>      | 11.4  | 10.8 | 12.2   | 11.5   | 10.9 | 12.0   | 13.0      | 12.5 | 13.4   | 12.2   | 11.6 | 12.8   |
| <b>75</b>      | 8.8   | 8.3  | 9.4    | 8.8    | 8.8  | 8.9    | 10.4      | 10.2 | 10.5   | 9.1    | 8.4  | 9.9    |
| <b>80</b>      | 6.6   | 6.2  | 7.0    | 6.6    | 6.5  | 6.7    | 7.4       | 7.5  | 7.2    | 6.8    | 6.2  | 7.4    |
| <b>85+</b>     | 4.8   | 4.5  | 5.1    | 4.7    | 4.5  | 5.0    | 6.4       | 6.1  | 6.7    | 5.1    | 5.2  | 5.1    |

Table: 4. Life expectancy across regions and sex in India, 2015-16

| Age Interval | Northeast |      |        | East  |      |        | North |      |        | Central |      |        | West  |      |        | South |      |        |
|--------------|-----------|------|--------|-------|------|--------|-------|------|--------|---------|------|--------|-------|------|--------|-------|------|--------|
|              | Total     | Male | Female | Total | Male | Female | Total | Male | Female | Total   | Male | Female | Total | Male | Female | Total | Male | Female |
| Below 1      | 66.8      | 64.9 | 69.1   | 66.7  | 66.2 | 67.1   | 70.7  | 68.7 | 73.0   | 66.6    | 65.4 | 67.9   | 70.9  | 68.8 | 73.2   | 69.2  | 66.6 | 72.2   |
| 1            | 68.9      | 67.0 | 71.1   | 69.2  | 68.4 | 70.0   | 72.0  | 70.0 | 74.3   | 69.1    | 67.7 | 70.6   | 71.6  | 69.6 | 74.0   | 70.9  | 68.4 | 73.7   |
| 5            | 65.7      | 63.7 | 68.1   | 65.7  | 64.8 | 66.7   | 68.4  | 66.3 | 70.8   | 65.7    | 64.1 | 67.4   | 68.1  | 65.9 | 70.7   | 67.8  | 65.3 | 70.7   |
| 10           | 60.9      | 58.9 | 63.3   | 61.0  | 60.0 | 61.9   | 63.5  | 61.5 | 65.9   | 60.9    | 59.3 | 62.6   | 63.3  | 61.1 | 65.9   | 63.3  | 60.8 | 66.2   |
| 15           | 56.2      | 54.1 | 58.5   | 56.2  | 55.2 | 57.2   | 58.7  | 56.7 | 61.1   | 56.1    | 54.6 | 57.9   | 58.5  | 56.2 | 61.0   | 58.5  | 56.0 | 61.3   |
| 20           | 51.5      | 49.5 | 53.9   | 51.5  | 50.5 | 52.5   | 53.9  | 51.9 | 56.3   | 51.5    | 49.9 | 53.2   | 53.7  | 51.4 | 56.4   | 53.7  | 51.3 | 56.5   |
| 25           | 46.9      | 44.9 | 49.2   | 46.9  | 45.9 | 47.9   | 49.2  | 47.2 | 51.6   | 46.9    | 45.4 | 48.7   | 49.1  | 46.7 | 51.8   | 49.1  | 46.7 | 51.8   |
| 30           | 42.3      | 40.3 | 44.6   | 42.2  | 41.3 | 43.2   | 44.5  | 42.6 | 46.9   | 42.4    | 40.9 | 44.1   | 44.4  | 42.1 | 47.0   | 44.5  | 42.1 | 47.1   |
| 35           | 37.7      | 35.9 | 39.9   | 37.7  | 36.8 | 38.6   | 39.9  | 38.0 | 42.1   | 37.8    | 36.4 | 39.4   | 39.7  | 37.5 | 42.3   | 39.9  | 37.7 | 42.4   |
| 40           | 33.3      | 31.5 | 35.4   | 33.2  | 32.5 | 34.0   | 35.4  | 33.6 | 37.5   | 33.3    | 31.9 | 34.9   | 35.2  | 33.0 | 37.6   | 35.5  | 33.5 | 37.7   |
| 45           | 29.0      | 27.3 | 30.9   | 28.8  | 28.2 | 29.5   | 30.9  | 29.2 | 32.9   | 28.9    | 27.6 | 30.4   | 30.8  | 28.8 | 33.0   | 31.1  | 29.2 | 33.1   |
| 50           | 24.9      | 23.6 | 26.5   | 24.5  | 24.0 | 25.1   | 26.7  | 25.1 | 28.5   | 24.7    | 23.5 | 25.9   | 26.6  | 24.8 | 28.5   | 26.8  | 25.2 | 28.6   |
| 55           | 21.1      | 19.9 | 22.5   | 20.6  | 20.1 | 21.1   | 22.7  | 21.2 | 24.3   | 20.8    | 19.6 | 22.1   | 22.4  | 21.0 | 24.0   | 22.8  | 21.3 | 24.4   |
| 60           | 17.3      | 16.3 | 18.5   | 17.0  | 16.6 | 17.3   | 18.8  | 17.7 | 20.1   | 17.1    | 16.1 | 18.1   | 18.6  | 17.5 | 19.8   | 19.1  | 17.8 | 20.4   |
| 65           | 14.4      | 13.5 | 15.3   | 13.5  | 13.2 | 13.8   | 15.2  | 14.2 | 16.3   | 13.9    | 13.1 | 14.8   | 15.2  | 14.2 | 16.2   | 15.6  | 14.6 | 16.6   |
| 70           | 11.5      | 11.1 | 12.0   | 10.6  | 10.3 | 11.0   | 12.1  | 11.2 | 13.1   | 11.1    | 10.4 | 11.9   | 11.8  | 11.0 | 12.7   | 12.5  | 11.7 | 13.2   |
| 75           | 9.0       | 8.6  | 9.5    | 8.0   | 7.7  | 8.4    | 9.1   | 8.3  | 10.0   | 8.5     | 7.9  | 9.1    | 9.2   | 8.7  | 9.7    | 10.1  | 9.6  | 10.5   |
| 80           | 6.6       | 6.3  | 6.8    | 6.0   | 5.9  | 6.0    | 6.6   | 5.9  | 7.4    | 6.4     | 6.0  | 6.8    | 6.8   | 6.3  | 7.2    | 7.6   | 7.3  | 8.0    |
| 85+          | 4.9       | 4.4  | 5.3    | 4.0   | 4.0  | 4.0    | 5.1   | 4.4  | 5.9    | 4.6     | 4.4  | 4.8    | 5.2   | 5.2  | 5.4    | 6.1   | 5.7  | 6.5    |



**Table 5. Probability of death at age 15-59 and premature mortality at age 70 by caste, religion and region in India**

| Probability of dying between n to x+n Interval |                  |                |                   |                |             |              |
|------------------------------------------------|------------------|----------------|-------------------|----------------|-------------|--------------|
| <b>Caste</b>                                   | <b>SC</b>        | <b>ST</b>      | <b>OBC</b>        | <b>Others</b>  |             |              |
| <b>15q59</b>                                   | 0.1440           | 0.1553         | 0.1223            | 0.1076         |             |              |
| <b>0q70</b>                                    | 0.3348           | 0.3332         | 0.2980            | 0.2604         |             |              |
| <b>Religion</b>                                | <b>Hindus</b>    | <b>Muslims</b> | <b>Christians</b> | <b>Others</b>  |             |              |
| <b>15q59</b>                                   | 0.1275           | 0.1136         | 0.1142            | 0.1265         |             |              |
| <b>0q70</b>                                    | 0.3000           | 0.3042         | 0.2647            | 0.2725         |             |              |
| <b>Region</b>                                  | <b>Northeast</b> | <b>East</b>    | <b>North</b>      | <b>Central</b> | <b>West</b> | <b>South</b> |
| <b>15q59</b>                                   | 0.1467           | 0.1325         | 0.1132            | 0.1374         | 0.1125      | 0.1198       |
| <b>0q70</b>                                    | 0.3407           | 0.3176         | 0.2584            | 0.3300         | 0.2647      | 0.2872       |

**Table 6. Probability of death at age 15-59 and premature mortality at age 70 among different categories of caste, religion and region by sex in India**

| Probability of dying between n to x+n Interval | SC               |               | ST             |               | OBC               |               | Others         |               |             |               |              |               |
|------------------------------------------------|------------------|---------------|----------------|---------------|-------------------|---------------|----------------|---------------|-------------|---------------|--------------|---------------|
| <b>Caste</b>                                   | <b>Male</b>      | <b>Female</b> | <b>Male</b>    | <b>Female</b> | <b>Male</b>       | <b>Female</b> | <b>Male</b>    | <b>Female</b> |             |               |              |               |
| <b>15q59</b>                                   | 0.1732           | 0.1109        | 0.1876         | 0.1202        | 0.1443            | 0.0987        | 0.1322         | 0.0795        |             |               |              |               |
| <b>0q70</b>                                    | 0.3806           | 0.2840        | 0.3926         | 0.2674        | 0.3316            | 0.2628        | 0.2931         | 0.2255        |             |               |              |               |
| <b>Religion</b>                                | <b>Hindus</b>    |               | <b>Muslims</b> |               | <b>Christians</b> |               | <b>Others</b>  |               |             |               |              |               |
| <b>15q59</b>                                   | 0.1537           | 0.0982        | 0.1265         | 0.1003        | 0.1504            | 0.0757        | 0.1510         | 0.0999        |             |               |              |               |
| <b>0q70</b>                                    | 0.3394           | 0.2572        | 0.3343         | 0.2736        | 0.3167            | 0.2067        | 0.3081         | 0.2349        |             |               |              |               |
| Probability of dying between n to x+n Interval | <b>Northeast</b> |               | <b>East</b>    |               | <b>North</b>      |               | <b>Central</b> |               | <b>West</b> |               | <b>South</b> |               |
| <b>Regions</b>                                 | <b>Male</b>      | <b>Female</b> | <b>Male</b>    | <b>Female</b> | <b>Male</b>       | <b>Female</b> | <b>Male</b>    | <b>Female</b> | <b>Male</b> | <b>Female</b> | <b>Male</b>  | <b>Female</b> |
| <b>15q59</b>                                   | 0.1783           | 0.1116        | 0.1474         | 0.1166        | 0.1371            | 0.0860        | 0.1544         | 0.1186        | 0.1456      | 0.0746        | 0.1549       | 0.0821        |
| <b>0q70</b>                                    | 0.3859           | 0.2871        | 0.3348         | 0.3013        | 0.3002            | 0.2123        | 0.3614         | 0.2974        | 0.3162      | 0.2074        | 0.3422       | 0.2258        |

## DECLARATION FOR DOUBLE BLIND

### Availability of Data and Material

The data used for the study are in the public domain and available online

(<https://dhsprogram.com/what-we-do/survey/survey-display-355.cfm>), and

[http://www.censusindia.gov.in/vital\\_statistics/Appendix\\_SRS\\_Based\\_Life\\_Table.html](http://www.censusindia.gov.in/vital_statistics/Appendix_SRS_Based_Life_Table.html)

**Funding:** The authors have not declared a specific grant for this research from any funding agency in the public, commercial or not-for-profit sectors.

**Contributors:** Meena Kumari and Sanjay Kumar Mohanty conceptualized the paper, prepared the analytical plan and wrote the paper.

**Competing Interests:** None declared

**Provenance and peer review:** Not commissioned; externally peer reviewed.

**Acknowledgements:** Authors thank editor and reviewers for their useful suggestions in revising the earlier draft. Authors also thank Mr. Suyash Mishra for his useful comments and suggestions.

## References

- 1 WHO. World Health Statistics 2016 Monitoring health For The SDGs. Geneva: 2016.
- 2 Gerry CJ, Raskina Y, Tsyplakova D. Convergence or Divergence? Life Expectancy Patterns in Post-communist Countries, 1959-2010. *Soc Indic Res* 2018;**140**:309–32. doi:10.1007/s11205-017-1764-4
- 3 Joe W, Liou L, Subramanian S V. Increasing global heterogeneity in the life expectancy of older populations. *bioRxiv* 2019;:589630. doi:10.1101/589630
- 4 Wilson C. Understanding Global Demographic Convergence since 1950. *Popul Dev Rev* 2011;**37**:375–88. doi:10.1111/j.1728-4457.2011.00415.x
- 5 McMichael AJ, McKee M, Shkolnikov V, *et al.* Mortality trends and setbacks: global convergence or divergence? *Lancet* 2004;**363**:1155–9. doi:https://doi.org/10.1016/S0140-6736(04)15902-3
- 6 Moser K, Shkolnikov VM, Leon DA. World Mortality 1950–2000: Divergence Replaces Convergence from the Late 1980s BT - HIV, Resurgent Infections and Population Change in Africa. In: Caraël M, Glynn JR, eds. . Dordrecht: : Springer Netherlands 2007. 11–25. doi:10.1007/978-1-4020-6174-5\_1
- 7 Wang H, Naghavi M, Allen C, *et al.* Global, regional, and national life expectancy, all-cause

- mortality, and cause-specific mortality for 249 causes of death, 1980–2015: a systematic analysis for the Global Burden of Disease Study 2015. *Lancet* 2016;**388**:1459–544. doi:[https://doi.org/10.1016/S0140-6736\(16\)31012-1](https://doi.org/10.1016/S0140-6736(16)31012-1)
- 8 Division UND of IE and SAP. Sex differentials in survivorship in the developing world: levels, regional patterns and demographic determinants. *Popul Bull UN* 1988;:51.
- 9 Gleit DA, Horiuchi S. The Narrowing Sex Differential in Life Expectancy in High-Income Populations: Effects of Differences in the Age Pattern of Mortality. *Popul Stud (NY)* 2007;**61**:141–59.<http://www.jstor.org/stable/27643410>
- 10 Zanfongnon R, Bourbeau R. Sex Differential in Life Expectancy at Birth in Canada, 1921-2004: Provincial Variations. 2008.
- 11 Dubey M, Ram U, Ram F. Threshold Levels of Infant and Under-Five Mortality for Crossover between Life Expectancies at Ages Zero, One and Five in India: A Decomposition Analysis. *PLoS One* 2015;**10**:e0143764.<https://doi.org/10.1371/journal.pone.0143764>
- 12 Singh A, Ladusingh L. Life expectancy at birth and life disparity: an assessment of sex differentials in mortality in India. *Int J Popul Stud* 2016;**2**. doi:10.18063/IJPS.2016.01.005
- 13 Dicker D, Nguyen G, Abate D, *et al*. Global, regional, and national age-sex-specific mortality and life expectancy, 1950-2017: a systematic analysis for the Global Burden of Disease Study 2017. *Lancet* 2018;**392**:1684–735. doi:10.1016/S0140-6736(18)31891-9
- 14 Bassett MT, Krieger N. Social class and black-white differences in breast cancer survival. *Am J Public Health* 1986;**76**:1400–3. doi:10.2105/ajph.76.12.1400
- 15 Keil JE, Sutherland SE, Knapp RG, *et al*. Does equal socioeconomic status in black and white men mean equal risk of mortality? *Am J Public Health* 1992;**82**:1133–6. doi:10.2105/ajph.82.8.1133
- 16 Hummer RA, Rogers RG, Eberstein IW. Sociodemographic Differentials in Adult Mortality: A Review of Analytic Approaches. *Popul Dev Rev* 1998;**24**:553–78. doi:10.2307/2808154
- 17 Wagstaff A. Socioeconomic inequalities in child mortality: comparisons across nine developing countries. *Bull World Health Organ* 2000;**78**:19–29.
- 18 Dowd K, Blake D, Cairns AJG. Facing up to uncertain life expectancy: The longevity fan charts. *Demography* 2010;**47**:67–78. doi:10.1353/dem.0.0083
- 19 Singh A, Pathak PK, Chauhan RK, *et al*. Infant and Child Mortality in India in the Last Two Decades: A Geospatial Analysis. *PLoS One* 2011;**6**:e26856.<https://doi.org/10.1371/journal.pone.0026856>
- 20 Eggleston KN, Fuchs VR. The New Demographic Transition: Most Gains in Life Expectancy Now Realized Late in Life. *J Econ Perspect* 2012;**26**:137–56. doi:10.1257/jep.26.3.137
- 21 Fenelon A. Geographic Divergence in Mortality in the United States. *Popul Dev Rev* 2013;**39**:611–34. doi:10.1111/j.1728-4457.2013.00630.x
- 22 Gordon E-S, Haklai Z, Meron J, *et al*. Regional variations in mortality and causes of death in Israel, 2009-2013. *Isr J Health Policy Res* 2017;**6**:39. doi:10.1186/s13584-017-0164-1
- 23 Liu L, Chu Y, Oza S, *et al*. National, regional, and state-level all-cause and cause-specific

- 1  
2  
3 under-5 mortality in India in 2000–15: a systematic analysis with implications for the  
4 Sustainable Development Goals. *Lancet Glob Heal* 2019;**7**:e721–34. doi:10.1016/S2214-  
5 109X(19)30080-4  
6  
7  
8 24 Montgomery AL, Ram U, Kumar R, *et al*. Maternal mortality in India: causes and healthcare  
9 service use based on a nationally representative survey. *PLoS One* 2014;**9**:e83331–e83331.  
10 doi:10.1371/journal.pone.0083331  
11  
12 25 Knudson A, Meit M, Tanenbaum E, *et al*. Exploring rural and urban mortality differences.  
13 *Bethesda Rural Heal Reform Policy Res Cent* 2015.  
14  
15 26 Saikia N. Trends in Mortality Differentials in India. 2016. 55–71. doi:10.1007/978-3-319-  
16 24783-0\_3  
17  
18 27 Chakraborti B. Rural-urban mortality differential in Indian states: effect of environmental  
19 inequality and associated factors. *Rural Demogr* 1982;**9**:1–6.  
20  
21 28 Hartley D. Rural health disparities, population health, and rural culture. *Am J Public Health*  
22 2004;**94**:1675–8. doi:10.2105/ajph.94.10.1675  
23  
24 29 Singh GK, Siahpush M. Widening Rural–Urban Disparities in Life Expectancy, U.S., 1969–  
25 2009. *Am J Prev Med* 2014;**46**:e19–29. doi:https://doi.org/10.1016/j.amepre.2013.10.017  
26  
27 30 Shah VR, Christian DS, Prajapati AC, *et al*. Quality of life among elderly population residing  
28 in urban field practice area of a tertiary care institute of Ahmedabad city, Gujarat. *J Fam Med*  
29 *Prim care* 2017;**6**:101–5. doi:10.4103/2249-4863.214965  
30  
31 31 Krishnaji N, James KS. Gender differentials in adult mortality: with notes on rural-urban  
32 contrasts. *Econ Polit Wkly* 2002;:4633–7.  
33  
34 32 Saikia N, Jasilionis D, Ram F, *et al*. Trends in geographical mortality differentials in India.  
35 *Rostock Max Planck Inst Demogr Res* 2009.  
36  
37 33 Ram U, Jha P, Gerland P, *et al*. Age-specific and sex-specific adult mortality risk in India in  
38 2014: analysis of 0· 27 million nationally surveyed deaths and demographic estimates from  
39 597 districts. *Lancet Glob Heal* 2015;**3**:e767–75.  
40  
41 34 Kannan KP, Thankappan KR, Ramankutty V, *et al*. Kerala: a unique model of development.  
42 *Health Millions* 1991;**17**:30–3.  
43  
44 35 Pal P, Ghosh J. Inequality in India: A survey of recent trends. 2007.  
45  
46 36 Sen A. Development as freedom (1999). *Roberts, JT, Hite, AB Chorev, N Glob Dev Read*  
47 *Perspect Dev Glob Chang* 2014;**2**:525–47.  
48  
49 37 Wang H, Abajobir AA, Abate KH, *et al*. Global, regional, and national under-5 mortality,  
50 adult mortality, age-specific mortality, and life expectancy, 1970–2016: a systematic analysis  
51 for the Global Burden of Disease Study 2016. *Lancet* 2017;**390**:1084–150. doi:10.1016/S0140-  
52 6736(17)31833-0  
53  
54 38 Mohindra KS, Haddad S, Narayana D. Women’s health in a rural community in Kerala, India:  
55 do caste and socioeconomic position matter? *J Epidemiol Community Health* 2006;**60**:1020 LP  
56 – 1026. doi:10.1136/jech.2006.047647  
57  
58 39 Subramanian S V, Ackerson LK, Subramanyam MA, *et al*. Health Inequalities in India: The  
59  
60

- 1  
2  
3 Axes of Stratification. *Brown J World Aff* 2008;**14**:127–  
4 38. <http://www.jstor.org/stable/24590719>  
5
- 6 40 Vart P, Jaglan A, Shafique K. Caste-based social inequalities and childhood anemia in India:  
7 results from the National Family Health Survey (NFHS) 2005–2006. *BMC Public Health*  
8 2015;**15**:537. doi:10.1186/s12889-015-1881-4  
9
- 10 41 Mackenbach JP, Kunst AE. Measuring the magnitude of socio-economic inequalities in health:  
11 An overview of available measures illustrated with two examples from Europe. *Soc Sci Med*  
12 1997;**44**:757–71. doi:[https://doi.org/10.1016/S0277-9536\(96\)00073-1](https://doi.org/10.1016/S0277-9536(96)00073-1)  
13
- 14 42 Kakwani N, Wagstaff A, Van Doorslaer E. Socioeconomic inequalities in health:  
15 measurement, computation, and statistical inference. *J Econom* 1997;**77**:87–103.  
16
- 17 43 Burström K, Johannesson M, Diderichsen F. Increasing socio-economic inequalities in life  
18 expectancy and QALYs in Sweden 1980–1997. *Health Econ* 2005;**14**:831–50.  
19 doi:10.1002/hec.977  
20
- 21 44 Subramanian S V, Smith GD, Subramanyam M. Indigenous Health and Socioeconomic Status  
22 in India. *PLOS Med* 2006;**3**:e421. <https://doi.org/10.1371/journal.pmed.0030421>  
23
- 24 45 Lorant V, Croux C, Weich S, *et al.* Depression and socio-economic risk factors: 7-year  
25 longitudinal population study. *Br J Psychiatry* 2007;**190**:293–8. doi:DOI:  
26 10.1192/bjp.bp.105.020040  
27
- 28 46 Malhotra C, Do YK. Socio-economic disparities in health system responsiveness in India.  
29 *Health Policy Plan* 2013;**28**:197–205. doi:10.1093/heapol/czs051  
30
- 31 47 Asaria M, Mazumdar S, Chowdhury S, *et al.* Socioeconomic inequality in life expectancy in  
32 India. *BMJ Glob Heal* 2019;**4**:e001445.  
33
- 34 48 Mohanty SK, Ram F. Life Expectancy At Birth Among Social and Economic Groups in India.  
35 IIPS Res. Br. 2010. [http://iipsindia.org/pdf/RB-13\\_file\\_for\\_uploading.pdf](http://iipsindia.org/pdf/RB-13_file_for_uploading.pdf) (accessed 1 Nov  
36 2016).  
37
- 38 49 Coffey D, Deshpande A, Hammer J, *et al.* Local Social Inequality, Economic Inequality, and  
39 Disparities in Child Height in India. *Demography* 2019;**56**:1427–52. doi:10.1007/s13524-019-  
40 00794-2  
41
- 42 50 LoPalo M, Coffey D, Spears D. The Consequences of Social Inequality for the Health and  
43 Development of India's Children: The Case of Caste, Sanitation, and Child Height. *Soc Justice*  
44 *Res* 2019;**32**:239–54. doi:10.1007/s11211-019-00323-x  
45
- 46 51 Patel P, Das M, Das U. The perceptions, health-seeking behaviours and access of Scheduled  
47 Caste women to maternal health services in Bihar, India. *Reprod Health Matters* 2018;**26**:114–  
48 25.  
49
- 50 52 Acharya SS. Health Equity in India: An Examination Through the Lens of Social Exclusion. *J*  
51 *Soc Incl Stud* 2018;**4**:104–30. doi:10.1177/2394481118774489  
52
- 53 53 Khubchandani J, Soni A, Fahey N, *et al.* Caste matters: perceived discrimination among  
54 women in rural India. *Arch Womens Ment Health* 2018;**21**:163–70.  
55
- 56 54 George S. *Caste and Care: Is Indian Healthcare Delivery System Favourable for Dalits?*  
57 Institute for Social and Economic Change 2015.  
58  
59  
60

- 1  
2  
3 55 Malhotra R, Rajan I, Syam S, *et al.* SOCIAL GROUP DISPARITIES IN LIFE  
4 EXPECTANCY AND ACTIVE LIFE EXPECTANCY AMONG OLDER PERSONS IN  
5 KERALA, INDIA. *Innov Aging* 2018;**2**:230. doi:10.1093/geroni/igy023.855  
6
- 7 56 Guillot M, Gavrilova N, Torgasheva L, *et al.* Divergent paths for adult mortality in Russia and  
8 Central Asia: evidence from Kyrgyzstan. *PLoS One* 2013;**8**:e75314.  
9
- 10 57 Preston Samuel H, Patrick H, Michel G. Demography: measuring and modeling population  
11 processes. *MA Blackwell Publ* 2001.  
12
- 13 58 Chiang CL. On Constructing Current Life Tables. *J Am Stat Assoc* 1972;**67**:538–41.  
14 doi:10.1080/01621459.1972.10481245  
15
- 16 59 Schoen R. Calculating Life Tables by Estimating Chiang's a From Observed Rates.  
17 *Demography* 1978;**15**:625–35. doi:10.2307/2061212  
18
- 19 60 Subramanian S V, Nandy S, Irving M, *et al.* The Mortality Divide in India: The Differential  
20 Contributions of Gender, Caste, and Standard of Living Across the Life Course. *Am J Public*  
21 *Health* 2006;**96**:818–25. doi:10.2105/AJPH.2004.060103  
22
- 23 61 Borooah VK, Dubey A, Iyer S. The Effectiveness of Jobs Reservation: Caste, Religion and  
24 Economic Status in India. *Dev Change* 2007;**38**:423–45. doi:10.1111/j.1467-  
25 7660.2007.00418.x  
26
- 27 62 Vijayanath V, Anitha MR, Vijayamahantesh SN, *et al.* Caste and health in Indian Scenario. *J*  
28 *Punjab Acad Forensic Med Toxicol* 2010;**10**:42–4.  
29
- 30 63 Saikia N, Bora JK. Does Increasing Longevity Lead Increasing Disability? Evidence from  
31 Indian States. *Soc Chang Dev* 2016;**13**.  
32
- 33 64 IIPS, ORC Macro. National Family Health Survey (NFHS-3) 2005-2006. Mumbai: 2007.  
34
- 35 65 Norheim OF, Jha P, Admasu K, *et al.* Avoiding 40% of the premature deaths in each country,  
36 2010–30: review of national mortality trends to help quantify the UN Sustainable  
37 Development Goal for health. *Lancet* 2015;**385**:239–52.  
38
- 39 66 Liu L, Hill K, Oza S, *et al.* Levels and causes of mortality under age five years. *Int Bank*  
40 *Reconstr Dev World Bank Reprod Matern newborn, child Heal Dis Control priorities*  
41 2015;**2**:71–83.  
42
- 43 67 Masquelier B, Hug L, Sharrow D, *et al.* Global, regional, and national mortality trends in older  
44 children and young adolescents (5&#x2013;14 years) from 1990 to 2016: an analysis of  
45 empirical data. *Lancet Glob Heal* 2018;**6**:e1087–99. doi:10.1016/S2214-109X(18)30353-X  
46  
47  
48  
49  
50  
51  
52  
53  
54  
55  
56  
57  
58  
59  
60

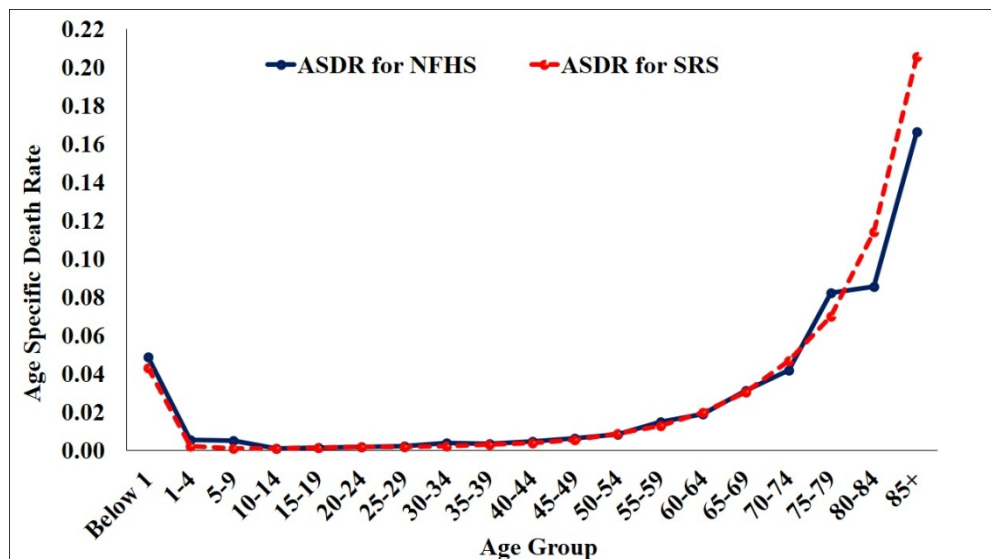

Figure 1: Age specific death rate from NFHS-4 and SRS, 2011-2015, in India

54x30mm (600 x 600 DPI)

1  
2  
3  
4  
5  
6  
7  
8  
9  
10  
11  
12  
13  
14  
15  
16  
17  
18  
19  
20  
21  
22  
23  
24  
25  
26  
27  
28  
29  
30  
31  
32  
33  
34  
35  
36  
37  
38  
39  
40  
41  
42  
43  
44  
45  
46  
47  
48  
49  
50  
51  
52  
53  
54  
55  
56  
57  
58  
59  
60

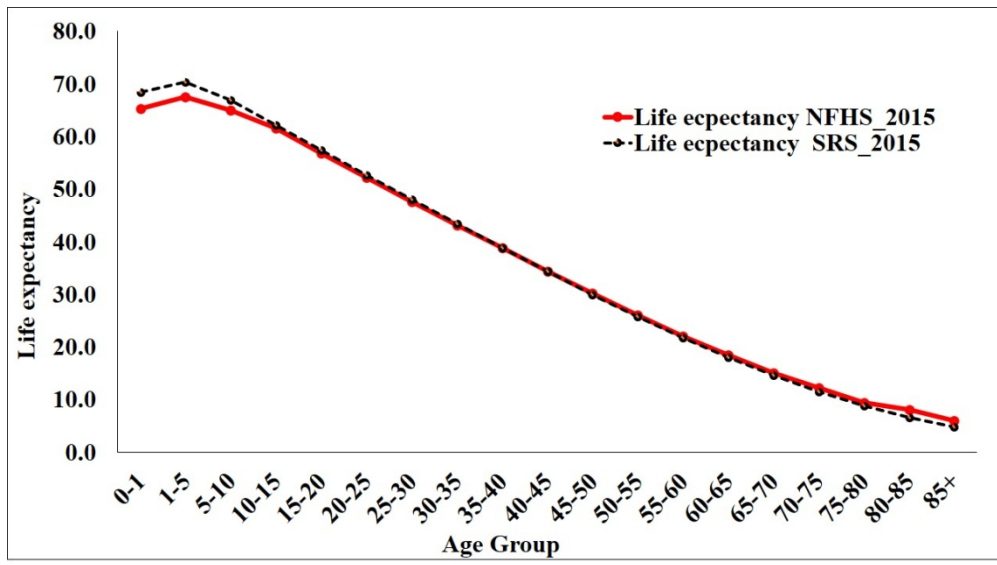

Figure 2: Estimated life expectancy at birth from NFHS-4, 2015-16 and SRS, 2011-15, in India

54x30mm (600 x 600 DPI)



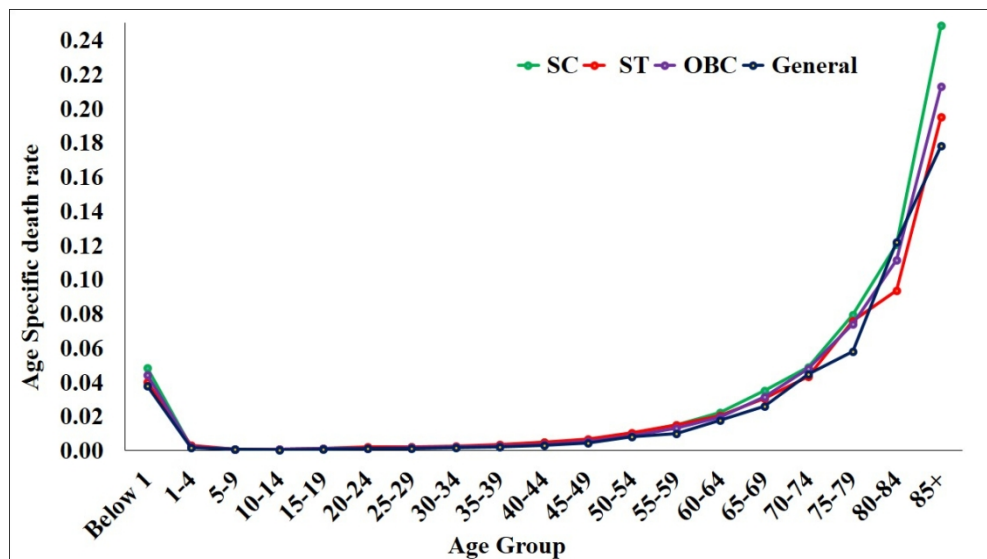

Figure 3: Adjusted Age Specific death rate across caste groups in India, 2015-16

54x30mm (600 x 600 DPI)

1  
2  
3  
4  
5  
6  
7  
8  
9  
10  
11  
12  
13  
14  
15  
16  
17  
18  
19  
20  
21  
22  
23  
24  
25  
26  
27  
28  
29  
30  
31  
32  
33  
34  
35  
36  
37  
38  
39  
40  
41  
42  
43  
44  
45  
46  
47  
48  
49  
50  
51  
52  
53  
54  
55  
56  
57  
58  
59  
60

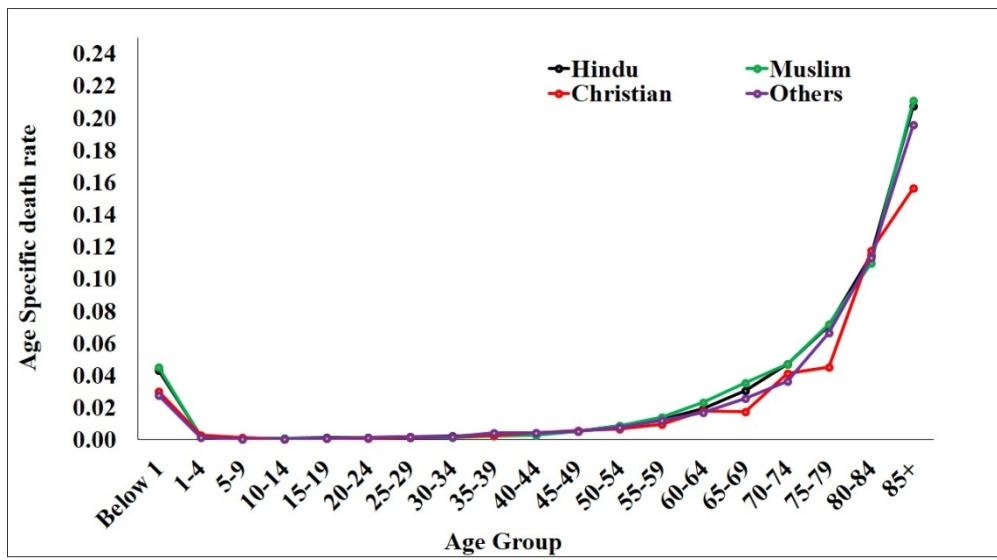

Figure 4: Age-specific death rate by religion in India, 2015-16

54x30mm (600 x 600 DPI)

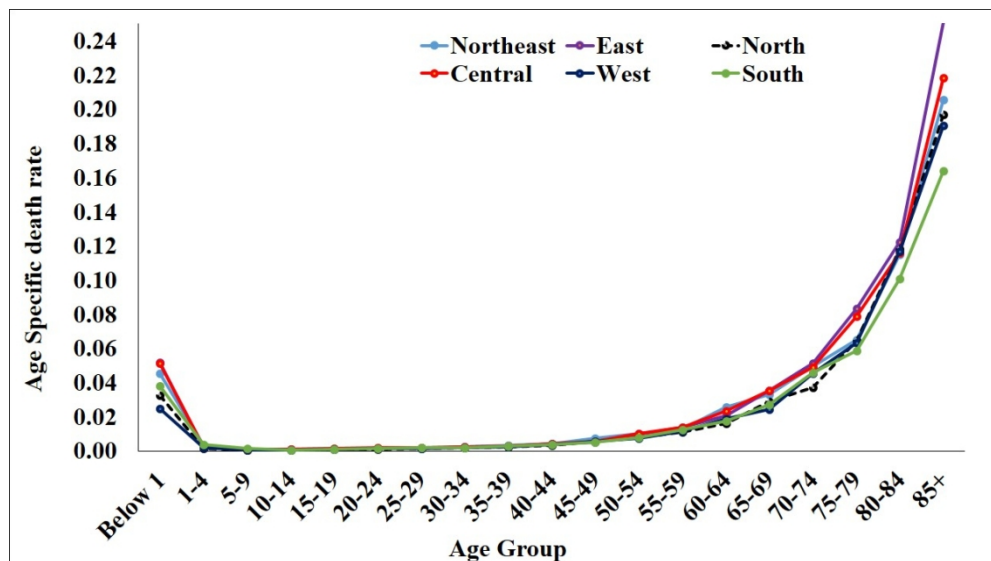

Figure 5: Age Specific death rate across Regions of India, 2015-16

54x30mm (600 x 600 DPI)

# BMJ Open

## Caste, religion and regional differentials in life expectancy at birth in India

|                                 |                                                                                                                                                                                        |
|---------------------------------|----------------------------------------------------------------------------------------------------------------------------------------------------------------------------------------|
| Journal:                        | <i>BMJ Open</i>                                                                                                                                                                        |
| Manuscript ID                   | bmjopen-2019-035392.R2                                                                                                                                                                 |
| Article Type:                   | Original research                                                                                                                                                                      |
| Date Submitted by the Author:   | 14-Apr-2020                                                                                                                                                                            |
| Complete List of Authors:       | Kumari, Meena; International Institute for Population Sciences, Fertility Studies<br>Mohanty, Sanjay; INTERNATIONAL INSTITUTE FOR POPULATION SCIENCES, DEPARTMENT OF FERTILITY STUDIES |
| <b>Primary Subject Heading</b>: | Public health                                                                                                                                                                          |
| Secondary Subject Heading:      | Global health, Epidemiology                                                                                                                                                            |
| Keywords:                       | PUBLIC HEALTH, EPIDEMIOLOGY, Adult intensive & critical care < INTENSIVE & CRITICAL CARE                                                                                               |
|                                 |                                                                                                                                                                                        |

SCHOLARONE™  
Manuscripts



I, the Submitting Author has the right to grant and does grant on behalf of all authors of the Work (as defined in the below author licence), an exclusive licence and/or a non-exclusive licence for contributions from authors who are: i) UK Crown employees; ii) where BMJ has agreed a CC-BY licence shall apply, and/or iii) in accordance with the terms applicable for US Federal Government officers or employees acting as part of their official duties; on a worldwide, perpetual, irrevocable, royalty-free basis to BMJ Publishing Group Ltd ("BMJ") its licensees and where the relevant Journal is co-owned by BMJ to the co-owners of the Journal, to publish the Work in this journal and any other BMJ products and to exploit all rights, as set out in our [licence](#).

The Submitting Author accepts and understands that any supply made under these terms is made by BMJ to the Submitting Author unless you are acting as an employee on behalf of your employer or a postgraduate student of an affiliated institution which is paying any applicable article publishing charge ("APC") for Open Access articles. Where the Submitting Author wishes to make the Work available on an Open Access basis (and intends to pay the relevant APC), the terms of reuse of such Open Access shall be governed by a Creative Commons licence – details of these licences and which [Creative Commons](#) licence will apply to this Work are set out in our licence referred to above.

Other than as permitted in any relevant BMJ Author's Self Archiving Policies, I confirm this Work has not been accepted for publication elsewhere, is not being considered for publication elsewhere and does not duplicate material already published. I confirm all authors consent to publication of this Work and authorise the granting of this licence.

# Caste, religion and regional differentials in life expectancy at birth in India

Meena Kumari, International Institute for Population Sciences (IIPS), Govandi Station Road, Deonar, Mumbai-400088

Email: meenaiips@gmail.com

Prof. Sanjay Kumar Mohanty, Department of Fertility Studies, International Institute for Population Sciences (IIPS) Mumbai-400088, India

Email: sanjayiips@yahoo.co.in

## **Word Count: 3115**

**Keywords:** Age-specific death rate, Life expectancy, Adult mortality, Premature mortality, Caste, Religion, Region, India

**Objective:** Though estimates of longevity are available by states, age, sex and place of residence in India, disaggregated estimates by social and economic groups are limited. This study, estimates the life expectancy at birth and premature mortality by caste, religion and regions of India.

**Design:** This study primarily used data from the National Family Health Survey (NFHS-4), 2015-2016 and the Sample Registration System (SRS), 2011-2015. The NFHS-4 has been the largest ever demographic and health survey covering 601,509 households and 811,808 individuals across all states and union territories in India.

**Measures:** The abridged life table is constructed to estimate the life expectancy at birth, adult mortality ( ${}_{15}q_{59}$ ) and premature mortality ( ${}_{0}q_{70}$ ) by caste, religion and region.

**Results:** Life expectancy at birth was estimated at 63.1 years [95% CI: 62.60-63.64] for Scheduled Castes (SC), 64.0 years [95% CI: 63.25-64.88] for Scheduled Tribes (ST), 65.1 years [95% CI: 64.69-65.42] for Other Backward Classes (OBC) and 68.0 years [95% CI: 67.44-68.45] for Others. Life expectancy at birth was higher among females than among males across social groups in India. It was higher among Christians 68.1 years [95% CI: 69.81-74.30] followed by Muslims 66.0 years [95% CI: 66.71-68.45] and Hindus 65.0 years [95% CI: 67.34-68.09]. Premature mortality was higher among SC (0.382), followed by ST (0.381), OBC (0.344) and Others (0.301). The regional variation in life expectancy by age and sex is large.

**Conclusion:** In India, social and religious differentials in life expectancy by sex are large. Premature mortality and adult mortality are also high across caste and religious groups.

## **Strengths and Limitations of the Study**

- This is the first ever study that provides estimates of life expectancy, by caste, religion and region in India.
- It provides estimates of premature and adult mortality across social groups and regions in India. Sex differentials in life expectancy and premature mortality are large across social groups and regions.
- Disease burden, disability and cause of premature mortality have not been explored in this study.

- State specific estimates of life expectancy, premature mortality have not been estimated due to inadequate sample size.
- Estimates of mortality and longevity are not linked to socio-economic status in India.

## Introduction

Life expectancy at birth is one of the most frequently used summary measures of health. It is used to quantify the health dimension of the human development index [1]. Globally, life expectancy at birth is converging among and within countries [2–4]. Life expectancy at birth, infant mortality rate, under-five mortality rate and utilisation of basic health services are converging too [5–7]. Though the sex differential in life expectancy at birth has been narrowing down, findings from a large number of studies in developing countries suggest that females are disadvantaged in health and health care utilization [8–13].

Though life expectancy at birth has been rising in almost all societies, mortality differences exist within, as well as between, population sub-groups within national and regional boundaries [14–23]. Regional disparity in mortality is associated with socio-economic well-being and access to health care [24–26]. Conventionally, those with an urban residence and the economically and socially better off tend to have lower mortality and higher longevity [27–30]. India with a population of 1.35 billion in 2018 is experiencing significant improvement in health indicators. Life expectancy at birth has increased from 58.7 years in 1990 to 68.30 years in 2015 (RGI). The state variations in life expectancy have been narrowing down over the years. Although India has witnessed spectacular improvement in mortality, the changes in mortality conditions across the states have been different [26]. There was a strong North-South gradient across the states, with great variations in the level and the pace of mortality reduction over time [31–33]. For instance, life expectancy was higher in Kerala than in Uttar Pradesh in India [34–37]; adult mortality and premature deaths were also high [33]. The national and state average in life expectancy conceal large variation among states and social groups in India.

Health, education, employment in India varies by social and economic groups in India. Caste and religion are often used as key social variables and given priority in national and state policies. The caste structure is also said to be associated with the economic well-being of the household. For the benefit of welfare schemes in India, the population of India is classified into four caste groups, namely Scheduled Castes (SC), Scheduled Tribes (ST), Other Backward Classes (OBC) and Others. The ST population, accounting for 8.6% of the total population is the most deprived followed by SCs. A large number of studies have examined the caste differentials in health and health-care in India and its states, and found that the SC and ST population have poor health [38–40]. However, studies suggest that the increasing socio-economic inequality over the years has led to poor health outcomes among population sub-groups in the country [41–47].

The Sample Registration System (SRS) provides regular estimates of life expectancy at birth and age-specific death rate for major states, by sex and place of residence. However, such estimates are not available for social groups such as caste and religion and by economic groups.

To our knowledge, there are few studies that provided the estimates of life expectancy by social group/economic group. Mohanty and Ram (2010) estimated life expectancy at birth among the social groups using NFHS-2 and NFHS-3 data and found that life expectancy at birth is similar among the poor across caste groups [48]. Recently Asaria et al. (2019) has provided estimates of life expectancy at birth across wealth quintiles using NFHS-4 data and found that life expectancy at birth among the poorest wealth quintile was 65.1 years compared to 72.7 years in the richest wealth quintile. Patel (2018) explains that SC women may be inequitably served by maternal health services and in some cases, even face specific discrimination. Low health status is observed among poor, female, rural and specific minority groups of Scheduled Tribes and Scheduled Castes [49–52]. In comparison to the General castes, lower caste (OBC, SC/ST) women were more likely to experience discrimination in rural western India [53]. Lower caste women reported a higher prevalence of poorer health than women of higher castes [38,54]. At age 60, life expectancy, active life expectancy and inactive life expectancy estimates were significantly higher, by 2.3, 1.9 and 0.4 years, for older persons in the General castes group versus those in the SC/ST/OBC groups respectively [46,55]. Many studies support the finding that life expectancy was lower in the Central region than in other regions [40,56].

The national average in longevity conceal large variations across population sub-groups and by socio-economic characteristics. This is the first ever study that estimates the life expectancy and mortality pattern by caste, religion, region and sex in India.

### Data Sources

Data from the National Family Health Survey (NFHS-4), 2015-16 and the Sample Registration System (SRS), 2011-2015 have been used. The National Family Health Surveys (NFHSs) are large-scale, multi-round surveys, conducted in a representative sample of households throughout India. The first round of NFHS was conducted in 1992-93 and the fourth round in 2015-16. The NFHS-4 covered 601,509 households and 811,808 individuals. The NFHS provides reliable estimates of fertility, child mortality, family planning, child nutritional status and childhood morbidity for the country. With regard to mortality, NFHS 1, 2 and 3 were intended to provide reliable estimates of infant and child mortality. However, in NFHS-4, an attempt was made to capture overall mortality and data were collected at the national and district levels. It has the distinction of the largest ever population based health survey in the country.

Questions were asked on the death of any members of the household in a three-year reference period. A total of 74,945 deaths was recorded during the survey. Along with death records, data on sex, place of residence, caste, religion and household's assets and amenities were collected. Caste data were collected for Scheduled Castes (SC), Scheduled Tribes (ST), Other Backward Classes (OBC) and Others. Generally, the STs are considered to be socially and economically poorer, followed by SCs and OBCs. Many central and state government welfare schemes have been specifically designed for the welfare of the population. Similarly, data on religion were collected in seven groups. These are Hindu, Muslim, Christian, Sikh, Buddhist, Jain, Other religion and Religion not stated. We have combined Sikh, Buddhist, Jain, Other



religion and Religion not stated groups owing to sample size constraints. The ASDR from SRS is used to compare the mortality rate across age groups.

### Methods:

The SRS data do not provide information on death by socio-economic status (SES). The advantages of using NFHS data is the use of its death statistics by socio-economic characteristics. In the NFHS-4, 0.6 per cent (479) of 74,945 deaths were found missing for one or more socio-economic status (SES). The missing information on SES for age at death were adjusted.

The following steps were used in adjusting missing cases, computing the Age-specific Death Rate (ASDR), life expectancy at birth, adult mortality ( $_{15}q_{59}$ ) and premature mortality ( $_{0}q_{70}$ ) by caste, religion and region.

1. Adjustment of Missing Death cases: The cases with missing information on SES for age at death were inflated by  $100/100-x$  for each age group [47].
2. A total of 479 cases was found missing for some basic variables like age, sex and other SES characteristics. We have distributed 479 cases equally in each age group.
3. Estimation of Age Specific Annual Death Rate (ASDR): The annual ASDR was estimated as the data were collected in three year reference period.

Estimation of life expectancy using abridged life table: Life expectancy at birth was computed using age-specific death and midyear population from the NFHS-4 life table approach. The 95% confidence interval of estimates are provided.

4. The abridged life table is constructed to estimate life expectancy at birth, adult mortality ( $_{15}q_{59}$ ) and premature mortality ( $_{0}q_{70}$ ) by caste, religion and region. Premature mortality is defined as any death under 70 years of age. The mathematical form of Premature ( $_{0}q_{70}$ ) =  $\frac{l_0 - l_{70}}{l_0}$ ; and Mortality in working age ( $_{15}q_{59}$ ) =  $\frac{l_{15} - l_{59}}{l_{15}}$  [57].

Finally, the age-specific death rate was used to compute life expectancy at birth by sex, caste, religion and region using the Chiang method. In the Chiang method the  ${}_n a_x$  is estimated by the average number of years lived in the  $x$  to  $x + n$  age interval by those dying in the interval [57–59].

### Patient and public involvement

Patients and the public were not involved. The paper uses secondary data available for public use.

### Results

**Figure 1** plots the age-specific death rate (ASDR) from SRS and NFHS in a five-year age group. The life expectancy at birth was 68.3 years from SRS and 65.3 years from NFHS 4. In general, the ASDRs is close from both the sources and the ASDRs overlap in a large number of age groups. **Table 1** presents the numerical value of ASDR from SRS and NFHS by a five-

1  
2  
3 year age group. **Figure 2** presents the life expectancy at various ages. Results suggest that life-  
4 expectancy varies with different social characteristics; caste, religion and region in India.  
5

6  
7 **Figure 3** summarizes the estimated ASDR by caste in India. The ASDR was higher among  
8 SCs (0.055) followed by OBCs (0.050), STs (0.045) and then Others (0.043) at below age one.  
9 Similarly, at later ages, the curve shows a skewed pattern in each category. **Figure 4** presents  
10 the age-specific death rate by religion. The ASDR was higher among Muslims (0.051) than  
11 among Others (0.031) for age below one. Among population aged 50 years, the ASDR was  
12 higher for Hindus than for Christian. But at later ages, the ASDR was higher among Muslims  
13 followed by Hindus, Others and Christians in India.  
14  
15

16  
17 **Figure 5** shows that the ASDR for those below one year, was higher in the Eastern region  
18 (0.059) followed by the Central region (0.025). The death rate among children aged 1-9 years  
19 was higher in the Southern than in the Northern regions (0.009 vs. 0.003). The death rate was  
20 almost similar between age groups 10-34. The death rate for population in the age group 65-  
21 69 was higher in the Eastern region than in the Western region (0.036 versus 0.025). The  
22 variations were visible at age below one and in the 1-4 age group and showed a gap amongst  
23 the population of age-groups 60-85.  
24  
25

26  
27 The life expectancy at birth varies from four years across different caste groups in India (**Table**  
28 **2**). The life expectancy at birth was estimated at 63.1 years [95% CI: 62.60-63.64] for  
29 Scheduled Castes, 64.0 years [95% CI: 63.25-64.88] for Scheduled Tribes, 65.1 years [95%  
30 CI: 64.69-65.42] for OBCs and 68.0 years [95% CI: 67.44-68.45] for Others (See Appendix  
31 Table 1). Females had a higher life expectancy at birth compared to males and this gap remains  
32 consistent across all the social groups. However, this gap decreases at the onset of elderly age  
33 (60 years) and ranges from 0.8 to 2.5 years across social groups. The life expectancy at age 60  
34 was 17 years for SCs, 18.2 years for OBCs, 18.6 years for STs and 19.5 years for Others. These  
35 findings are consistent with those of other studies [8,9]. Women had a higher life expectancy  
36 than men across different caste categories in India.  
37  
38  
39

40  
41 **Table 3** summarizes religious differentials in life expectancy. It suggests that the life  
42 expectancy at birth was higher among Others 68.6 years [95% CI: 67.38-69.80] compared to  
43 Christian 68.1 years [95% CI: 66.44-69.60] and Muslims 65.9 years [95% CI: 65.29-66.54]  
44 than India 65.0 years [95% CI: 64.74-65.22] (See Appendix Table 2). The gap in life  
45 expectancy between male and female was highest among Christians (8 years), followed by  
46 Others (6 years), Hindus (5 years) and Muslims (3 years). Female life expectancy at birth was  
47 highest among Christians (72.1 years) followed by Others (71.5 years) and Hindus (67.7 years)  
48 but it was lowest among Muslims (67.6). The sex differential in life expectancy at age 20 was  
49 higher among Christians followed by Hindus, Others and Muslims.  
50  
51  
52

53  
54 **Table 4** presents the life expectancy at birth by region in India, which ranges from 64–69 years.  
55 With a difference of more than 5 years, the life expectancy was as low as 63.6 years [95% CI:  
56 63.12-64.05] in the East region compared to 68.7 years [95% CI: 68.06-69.34] (See Appendix  
57 Table 3) in the North region. However, the life expectancy at age one was 68.7 years in the  
58 Northern region and 63.8 years in the Northeast – a difference of 4.9 years. Similarly, among  
59 males, the life expectancy at birth ranged from 66.2 years [95% CI: 65.42-67.09] in the West  
60

1  
2  
3 to 60.9 years [95% CI: 59.16-62.58] (See Appendix Table 3) in the Northeast region –a  
4 difference of 5.3 years. At age one, the gap in life expectancy by sex was as high as 8 years in  
5 the South followed by the Northeast (5.5 years), North (5.4 years) and West (4.8 years). Below  
6 age one, the gap in life expectancy by sex was lower in the Eastern region. Similarly, life  
7 expectancy at birth for females was higher in the North region 71.8 years [95% CI: 70.96-  
8 72.73] and lower in the Eastern region 64.8 years [95% CI: 64.15-65.45] (See Appendix Table  
9 3), a difference of 7.0 years.  
10  
11  
12

13  
14 The probability of death for adults (15-59 years) and premature mortality (before at age 70)  
15 were estimated by sex, caste, region and religion. Results were presented in Table 5 and 6.  
16 **Table 5** shows that the level of adult mortality is higher among males than among females in  
17 India. Individuals belonging to STs have a higher probability of adult death (0.178) than SCs  
18 caste groups (0.165). Similarly, by religion, the probability of death among Hindus was 0.147  
19 compared to 0.145 among Others, followed by 0.133 among Christians and 0.129 among  
20 Muslims. By region, the probability of adult death in the North-eastern region was higher  
21 (0.167) than that in the Central regions (0.158). Similarly, premature mortality by caste group  
22 revealed that individuals belonging to SCs had a higher probability of premature mortality than  
23 General castes (0.382 versus 0.301). Premature mortality was also analyzed by religions and  
24 regions in India and was found to vary. For instance, Hindu (0.347) had a higher premature  
25 mortality than Muslim (0.341) and Christians (0.316). By region, the probability of premature  
26 mortality in the Northeast was 0.385 followed by Central 0.372, East 0.364, Southern 0.349,  
27 Western 0.303 and Northern regions 0.294. **Table 6** reveals that the adult mortality and  
28 premature mortality was higher among males than among females in each social strata; caste,  
29 religion, region in India. Premature mortality among males and females was high among STs  
30 (0.159) followed by SCs (0.127), OBCs (0.099) and Others (0.097). Similarly, for religion,  
31 premature mortality gap was higher among Christians than among Hindu. Regional variations  
32 shows that the gap was wider in the South than in other regions.  
33  
34  
35  
36  
37  
38  
39

40 Prior studies suggests that caste and religion differentials show inequality in mortality across  
41 populations, subgroups and geographic areas [44,59,60]. This study addresses social disparities  
42 in health and provides evidence for the gap in life expectancy and premature mortality across  
43 different social groups in India.  
44

## 45 Discussion

46  
47 Life expectancy at birth is widely used as a summary measure of health. Disaggregated  
48 estimates of life expectancy are limited in many developing countries including India. This is  
49 the first ever study that estimates life expectancy at birth and premature mortality by social  
50 groups such as caste, religion and region in India. The followings are salient findings of this  
51 study.  
52  
53

54 **First**, life expectancy at birth varies largely across caste, religion and region in India. Life  
55 expectancy at birth among SCs was lowest, followed by STs, OBCs and Others. **Second**, the  
56 caste and religion differentials in life expectancy were not only observed at birth but also across  
57 the ages. Life expectancy at birth was highest among Christians followed by Others, Muslims  
58 and Hindus. The gap in life expectancy at birth between Christians and Hindus was 3 years. It  
59  
60

1  
2  
3 was low in the Central region compared to the Western region at age below one year. **Third**,  
4 we found consistent sex differentials in life expectancy across caste and religious groups. Life  
5 expectancy at birth for women was higher for men across social groups in both rural and urban  
6 areas. **Fourth**, adult mortality ( $_{15}q_{59}$ ) was highest among SCs and the gap between SCs and  
7 Others was 0.4. However, in the case of religion, the probability of adult death ( $_{15}q_{59}$ ) was  
8 higher among Hindus than among Muslims. The probability of death was higher among  
9 Northeast than in the Western region in India. **Fifth**, premature mortality ( $_{0}q_{70}$ ) was highest  
10 among SCs. In the case of religion, premature deaths ( $_{0}q_{70}$ ) among Muslims was higher than  
11 among Christians. By region, premature mortality ( $_{0}q_{70}$ ) in the Northeast was higher than in the  
12 North.  
13  
14  
15  
16

17 We put forward the following explanations. Life expectancy has been explained by a  
18 combination of biological and behavioural factors [47]. The caste system, with its societal  
19 stratification and social restrictions, continues to have a major impact in India [61]. Caste and  
20 religion are inextricably linked to and is a proxy for socio-economic status in India. The poor  
21 socio-economic status (SES) is significantly associated with poor health outcomes and lower  
22 access to health-care facilities. Caste-based exclusion is related to lack of access to services.  
23 Lower accessibility and poorer health statistics are observed among the lower castes in India.  
24 Similarly, gender variations in health are persistent cutting across caste and religion. Though  
25 women are living longer than men, they have higher morbidity and disability at later ages [62].  
26 The average year of disability free life expectancy among females was lower than among male.  
27 Adult mortality risks could be a result of chronic diseases or malnutrition in childhood. Most  
28 of the non-communicable diseases are non-curable but can be controlled with regular treatment.  
29 On the other hand, while the risk of being affected by these life-style conditions is relatively  
30 lower among the poor, once affected, they cannot afford the continued high treatment costs and  
31 so they experience premature death. The findings indicate significant differences in the  
32 population's health across different castes, religions and regions. Hindu children have higher  
33 mortality than Muslim children [63].  
34  
35  
36  
37  
38  
39

40 The reduction of premature mortality, a major public health focus, is one of the UN Sustainable  
41 Development Goals [64]. The Mortality rate has decreased for most age groups from 2000 to  
42 2016, especially for adolescents and young adults in many developed and developing regions,  
43 but remains high among middle aged adults (ages 36-55) and older adults (55 years). However,  
44 premature mortality and adult mortality are still higher among all ethnic groups globally [65–  
45 67].  
46  
47  
48

## 49 **Conclusion**

50 The findings suggest that the mortality differentials are significant across caste, religion and  
51 region in India. Though, female life expectancy at birth is higher for females, they might be  
52 suffering from higher morbidity. Premature mortality is high across caste and religious groups.  
53 Prioritizing reduction of premature mortality, including infant and under-five mortality is  
54 recommended.  
55  
56  
57  
58  
59

## 60 **Figure 1: Age-specific Death Rate from NFHS-4 and SRS, 2011-2015, in India**

**Figure 2: Estimated life expectancy at birth from NFHS-4, 2015-16 and SRS, 2011-15, in India**

**Figure 3: Age-specific death rate across caste groups in India, 2015-16**

**Figure 4: Age-specific death rate by religion in India, 2015-16**

**Figure 5: Age-specific death rate across regions in India, 2015-16**

**Table 1: ASDR by five-year age group and estimated life expectancy from NFHS 4 and SRS in India, 2015-16**

| Age Group | ASDR_NFHS | ASDR_SRS | Life Expectancy NFHS_2015 with CIs | Life Expectancy SRS_2015 |
|-----------|-----------|----------|------------------------------------|--------------------------|
| 0-1       | 0.0485    | 0.0429   | 65.3 (65.08-65.54)                 | 68.3                     |
| 1-5       | 0.0055    | 0.0022   | 67.5 (67.34-67.75)                 | 70.3                     |
| 5-10      | 0.0049    | 0.0008   | 65.0 (64.79-65.20)                 | 66.9                     |
| 10-15     | 0.0008    | 0.0007   | 61.5 (61.35-61.74)                 | 62.2                     |
| 15-20     | 0.0014    | 0.0011   | 56.8 (56.59-56.94)                 | 57.4                     |
| 20-25     | 0.0018    | 0.0015   | 52.2 (51.98-52.34)                 | 52.7                     |
| 25-30     | 0.0021    | 0.0017   | 47.6 (47.44-47.79)                 | 48.1                     |
| 30-35     | 0.0036    | 0.0020   | 43.1 (42.93-43.28)                 | 43.5                     |
| 35-40     | 0.0032    | 0.0027   | 38.8 (38.68-39.01)                 | 38.9                     |
| 40-45     | 0.0045    | 0.0038   | 34.4 (34.24-34.57)                 | 34.4                     |
| 45-50     | 0.0060    | 0.0054   | 30.1 (29.98-30.31)                 | 30.0                     |
| 50-55     | 0.0083    | 0.0086   | 26.0 (25.83-26.15)                 | 25.7                     |
| 55-60     | 0.0147    | 0.0127   | 22.0 (21.84-22.15)                 | 21.7                     |
| 60-65     | 0.0188    | 0.0196   | 18.5 (18.32-18.63)                 | 18.0                     |
| 65-70     | 0.0311    | 0.0303   | 15.1 (14.91-15.20)                 | 14.6                     |
| 70-75     | 0.0418    | 0.0465   | 12.2 (12.04-12.32)                 | 11.5                     |
| 75-80     | 0.0821    | 0.0700   | 9.4 (9.29-9.58)                    | 8.9                      |
| 80-85     | 0.0856    | 0.1142   | 8.0 (7.89-8.13)                    | 6.6                      |
| 85+       | 0.1664    | 0.2058   | 6.0 (6.01-6.01)                    | 4.9                      |

**Table 2. Life expectancy by caste and sex in India, 2015-16**

| Age Interval   | SC    |       |        | ST    |       |        | OBC   |       |        | Others |       |        |
|----------------|-------|-------|--------|-------|-------|--------|-------|-------|--------|--------|-------|--------|
|                | Total | Male  | Female | Total | Male  | Female | Total | Male  | Female | Total  | Male  | Female |
| <b>Below 1</b> | 63.13 | 60.32 | 66.31  | 64.02 | 60.53 | 67.89  | 65.06 | 62.88 | 67.47  | 67.94  | 66.09 | 69.95  |
| <b>1</b>       | 65.65 | 63.13 | 68.48  | 65.96 | 62.90 | 69.34  | 67.35 | 65.25 | 69.64  | 69.89  | 68.11 | 71.81  |
| <b>5</b>       | 63.12 | 60.59 | 65.95  | 63.84 | 60.98 | 67.01  | 64.82 | 62.81 | 67.00  | 67.07  | 65.26 | 69.01  |
| <b>10</b>      | 59.70 | 57.18 | 62.52  | 60.04 | 57.18 | 63.19  | 61.43 | 59.41 | 63.62  | 63.59  | 61.89 | 65.41  |
| <b>15</b>      | 54.96 | 52.43 | 57.78  | 55.35 | 52.52 | 58.47  | 56.65 | 54.62 | 58.87  | 58.77  | 57.06 | 60.58  |
| <b>20</b>      | 50.39 | 47.90 | 53.17  | 50.83 | 47.98 | 53.98  | 52.03 | 49.98 | 54.26  | 54.10  | 52.37 | 55.96  |
| <b>25</b>      | 45.87 | 43.42 | 48.61  | 46.44 | 43.58 | 49.60  | 47.48 | 45.46 | 49.69  | 49.53  | 47.77 | 51.41  |
| <b>30</b>      | 41.45 | 39.08 | 44.11  | 42.06 | 39.29 | 45.14  | 42.96 | 41.02 | 45.07  | 44.92  | 43.25 | 46.71  |
| <b>35</b>      | 37.25 | 35.02 | 39.75  | 37.96 | 35.38 | 40.80  | 38.70 | 36.90 | 40.68  | 40.48  | 38.98 | 42.10  |
| <b>40</b>      | 32.87 | 30.83 | 35.17  | 33.72 | 31.36 | 36.30  | 34.27 | 32.64 | 36.07  | 35.96  | 34.62 | 37.40  |
| <b>45</b>      | 28.76 | 26.98 | 30.77  | 29.65 | 27.42 | 32.08  | 29.97 | 28.53 | 31.55  | 31.55  | 30.36 | 32.82  |
| <b>50</b>      | 24.66 | 23.04 | 26.47  | 25.69 | 23.75 | 27.77  | 25.78 | 24.56 | 27.13  | 27.31  | 26.30 | 28.39  |
| <b>55</b>      | 20.76 | 19.45 | 22.26  | 21.88 | 20.30 | 23.63  | 21.74 | 20.72 | 22.91  | 23.30  | 22.73 | 23.97  |
| <b>60</b>      | 17.39 | 16.27 | 18.69  | 18.62 | 17.44 | 19.93  | 18.24 | 17.44 | 19.15  | 19.51  | 19.16 | 19.96  |
| <b>65</b>      | 14.09 | 13.20 | 15.10  | 15.29 | 14.44 | 16.21  | 14.79 | 14.14 | 15.53  | 16.01  | 15.82 | 16.29  |
| <b>70</b>      | 11.37 | 10.72 | 12.12  | 12.47 | 11.69 | 13.28  | 11.95 | 11.44 | 12.52  | 12.93  | 12.87 | 13.08  |
| <b>75</b>      | 8.55  | 8.00  | 9.15   | 9.63  | 9.04  | 10.19  | 9.22  | 8.85  | 9.61   | 10.27  | 10.34 | 10.28  |
| <b>80</b>      | 7.22  | 6.66  | 7.78   | 8.70  | 8.28  | 9.09   | 7.95  | 7.51  | 8.39   | 8.44   | 8.66  | 8.34   |
| <b>85+</b>     | 4.97  | 4.47  | 5.43   | 6.35  | 6.32  | 6.38   | 5.82  | 5.46  | 6.15   | 6.95   | 7.97  | 6.28   |

Table: 3. Life Expectancy by religion and sex in India, 2015-16

| Age Interval   | Hindu |       |        | Muslim |       |        | Christian |       |        | Others |       |        |
|----------------|-------|-------|--------|--------|-------|--------|-----------|-------|--------|--------|-------|--------|
|                | Total | Male  | Female | Total  | Male  | Female | Total     | Male  | Female | Total  | Male  | Female |
| <b>Below 1</b> | 64.98 | 62.51 | 67.71  | 65.89  | 64.39 | 67.55  | 68.07     | 64.33 | 72.06  | 68.59  | 65.89 | 71.53  |
| <b>1</b>       | 67.22 | 64.94 | 69.71  | 68.32  | 66.84 | 69.92  | 69.41     | 65.80 | 73.24  | 69.74  | 67.39 | 72.28  |
| <b>5</b>       | 64.74 | 62.54 | 67.14  | 65.54  | 63.92 | 67.29  | 67.19     | 64.11 | 70.40  | 66.60  | 64.46 | 68.91  |
| <b>10</b>      | 61.39 | 59.19 | 63.78  | 61.61  | 60.03 | 63.33  | 64.40     | 61.88 | 66.96  | 62.53  | 60.30 | 64.94  |
| <b>15</b>      | 56.63 | 54.42 | 59.03  | 56.82  | 55.20 | 58.58  | 59.60     | 57.18 | 62.05  | 57.64  | 55.41 | 60.05  |
| <b>20</b>      | 52.03 | 49.81 | 54.45  | 52.15  | 50.59 | 53.84  | 54.97     | 52.50 | 57.48  | 52.91  | 50.75 | 55.22  |
| <b>25</b>      | 47.51 | 45.30 | 49.91  | 47.60  | 46.03 | 49.30  | 50.26     | 47.74 | 52.83  | 48.27  | 46.23 | 50.44  |
| <b>30</b>      | 43.01 | 40.90 | 45.32  | 42.96  | 41.45 | 44.62  | 45.66     | 43.28 | 48.09  | 43.77  | 41.74 | 45.94  |
| <b>35</b>      | 38.77 | 36.83 | 40.89  | 38.51  | 37.07 | 40.09  | 41.45     | 39.10 | 43.83  | 39.44  | 37.72 | 41.25  |
| <b>40</b>      | 34.35 | 32.59 | 36.28  | 34.01  | 32.66 | 35.50  | 37.02     | 34.94 | 39.14  | 35.33  | 33.58 | 37.16  |
| <b>45</b>      | 30.10 | 28.55 | 31.79  | 29.55  | 28.26 | 30.98  | 32.91     | 31.19 | 34.64  | 31.22  | 29.79 | 32.71  |
| <b>50</b>      | 25.95 | 24.60 | 27.42  | 25.32  | 24.18 | 26.58  | 28.90     | 27.47 | 30.35  | 27.11  | 25.81 | 28.44  |
| <b>55</b>      | 21.97 | 20.93 | 23.14  | 21.31  | 20.33 | 22.42  | 24.75     | 23.85 | 25.72  | 23.04  | 22.05 | 24.10  |
| <b>60</b>      | 18.45 | 17.64 | 19.36  | 17.87  | 17.08 | 18.77  | 21.02     | 20.11 | 21.98  | 19.54  | 18.93 | 20.20  |
| <b>65</b>      | 14.99 | 14.37 | 15.70  | 14.66  | 14.16 | 15.22  | 17.68     | 17.20 | 18.18  | 15.99  | 15.35 | 16.69  |
| <b>70</b>      | 12.10 | 11.60 | 12.66  | 12.09  | 11.79 | 12.43  | 14.08     | 13.81 | 14.39  | 12.89  | 12.48 | 13.33  |
| <b>75</b>      | 9.37  | 8.97  | 9.80   | 9.36   | 9.49  | 9.23   | 11.44     | 11.40 | 11.49  | 9.74   | 9.19  | 10.33  |
| <b>80</b>      | 7.97  | 7.61  | 8.34   | 8.01   | 7.97  | 8.07   | 9.16      | 9.41  | 8.92   | 8.24   | 7.77  | 8.71   |
| <b>85+</b>     | 5.97  | 5.85  | 6.09   | 5.86   | 5.86  | 5.89   | 7.91      | 7.89  | 7.96   | 6.32   | 6.68  | 6.06   |

**Table 4. Life expectancy across regions and sex in India, 2015-16**

| Age Interval   | Northeast |       |        | East  |       |        | North |       |        | Central |       |        | West  |       |        | South |       |        |
|----------------|-----------|-------|--------|-------|-------|--------|-------|-------|--------|---------|-------|--------|-------|-------|--------|-------|-------|--------|
|                | Total     | Male  | Female | Total | Male  | Female | Total | Male  | Female | Total   | Male  | Female | Total | Male  | Female | Total | Male  | Female |
| <b>Below 1</b> | 63.77     | 60.88 | 67.09  | 63.57 | 62.39 | 64.79  | 68.68 | 65.97 | 71.82  | 63.76   | 61.80 | 65.94  | 68.64 | 66.19 | 71.35  | 64.87 | 60.97 | 69.22  |
| <b>1</b>       | 66.11     | 63.56 | 69.04  | 66.37 | 65.22 | 67.56  | 70.24 | 67.75 | 73.11  | 66.55   | 64.76 | 68.52  | 69.58 | 67.28 | 72.11  | 66.69 | 63.14 | 70.59  |
| <b>5</b>       | 64.07     | 61.63 | 66.86  | 63.59 | 62.44 | 64.77  | 67.15 | 64.75 | 69.89  | 63.95   | 62.02 | 66.08  | 66.78 | 64.48 | 69.30  | 65.04 | 61.87 | 68.46  |
| <b>10</b>      | 60.26     | 57.79 | 63.11  | 60.19 | 59.01 | 61.40  | 63.12 | 60.74 | 65.83  | 60.11   | 58.25 | 62.17  | 62.93 | 60.39 | 65.72  | 62.90 | 59.94 | 66.08  |
| <b>15</b>      | 55.53     | 53.07 | 58.34  | 55.46 | 54.24 | 56.70  | 58.30 | 55.91 | 61.03  | 55.38   | 53.51 | 57.45  | 58.07 | 55.52 | 60.88  | 58.09 | 55.16 | 61.22  |
| <b>20</b>      | 51.01     | 48.55 | 53.82  | 50.87 | 49.65 | 52.11  | 53.63 | 51.24 | 56.35  | 50.85   | 48.99 | 52.89  | 53.41 | 50.80 | 56.29  | 53.41 | 50.50 | 56.50  |
| <b>25</b>      | 46.42     | 44.04 | 49.17  | 46.34 | 45.13 | 47.57  | 49.00 | 46.62 | 51.70  | 46.41   | 44.56 | 48.45  | 48.84 | 46.19 | 51.77  | 48.82 | 45.99 | 51.84  |
| <b>30</b>      | 41.95     | 39.65 | 44.61  | 41.77 | 40.61 | 42.96  | 44.37 | 42.07 | 46.99  | 42.00   | 40.24 | 43.95  | 44.25 | 41.66 | 47.12  | 44.35 | 41.66 | 47.23  |
| <b>35</b>      | 37.70     | 35.59 | 40.14  | 37.59 | 36.54 | 38.68  | 39.99 | 37.85 | 42.43  | 37.77   | 36.17 | 39.57  | 39.87 | 37.42 | 42.54  | 40.10 | 37.66 | 42.71  |
| <b>40</b>      | 33.38     | 31.37 | 35.71  | 33.16 | 32.32 | 34.04  | 35.54 | 33.53 | 37.82  | 33.32   | 31.81 | 35.02  | 35.38 | 33.07 | 37.90  | 35.76 | 33.56 | 38.12  |
| <b>45</b>      | 29.19     | 27.38 | 31.29  | 28.92 | 28.27 | 29.62  | 31.18 | 29.33 | 33.28  | 29.08   | 27.71 | 30.63  | 31.11 | 29.07 | 33.32  | 31.49 | 29.53 | 33.57  |
| <b>50</b>      | 25.29     | 23.80 | 27.03  | 24.72 | 24.18 | 25.30  | 27.07 | 25.39 | 28.97  | 24.90   | 23.67 | 26.28  | 26.98 | 25.18 | 28.87  | 27.34 | 25.64 | 29.15  |
| <b>55</b>      | 21.44     | 20.30 | 22.84  | 20.78 | 20.42 | 21.18  | 23.03 | 21.66 | 24.63  | 21.01   | 19.98 | 22.19  | 22.85 | 21.53 | 24.29  | 23.29 | 21.96 | 24.76  |
| <b>60</b>      | 17.91     | 16.96 | 19.06  | 17.32 | 17.10 | 17.60  | 19.37 | 18.36 | 20.59  | 17.52   | 16.68 | 18.49  | 19.27 | 18.30 | 20.29  | 19.83 | 18.72 | 21.04  |
| <b>65</b>      | 14.93     | 14.21 | 15.77  | 13.86 | 13.72 | 14.02  | 15.74 | 14.85 | 16.80  | 14.31   | 13.69 | 15.04  | 15.84 | 15.09 | 16.62  | 16.34 | 15.54 | 17.21  |
| <b>70</b>      | 12.22     | 11.92 | 12.57  | 11.13 | 11.00 | 11.30  | 12.85 | 12.08 | 13.76  | 11.66   | 11.11 | 12.28  | 12.61 | 12.02 | 13.21  | 13.39 | 12.88 | 13.93  |
| <b>75</b>      | 9.64      | 9.31  | 10.01  | 8.38  | 8.24  | 8.55   | 9.72  | 9.03  | 10.51  | 8.91    | 8.46  | 9.41   | 9.90  | 9.62  | 10.17  | 10.88 | 10.62 | 11.13  |
| <b>80</b>      | 7.99      | 7.77  | 8.23   | 7.16  | 7.20  | 7.15   | 8.11  | 7.32  | 8.96   | 7.76    | 7.44  | 8.08   | 8.27  | 7.89  | 8.62   | 9.36  | 9.03  | 9.66   |
| <b>85+</b>     | 6.01      | 5.74  | 6.29   | 4.94  | 5.18  | 4.74   | 6.28  | 5.63  | 6.95   | 5.67    | 5.67  | 5.68   | 6.49  | 6.70  | 6.38   | 7.55  | 7.35  | 7.72   |



Table: 5. Probability of death at age 15-59 and premature mortality at age 70 by caste, religion and region in India

| Probability of dying between n to x+n Interval |                  |                |                   |                |             |              |
|------------------------------------------------|------------------|----------------|-------------------|----------------|-------------|--------------|
| <b>Caste</b>                                   | <b>SC</b>        | <b>ST</b>      | <b>OBC</b>        | <b>Others</b>  |             |              |
| 15q59                                          | 0.1651           | 0.1783         | 0.1407            | 0.1223         |             |              |
| 0q70                                           | 0.3823           | 0.3811         | 0.3443            | 0.3006         |             |              |
| <b>Religion</b>                                | <b>Hindus</b>    | <b>Muslims</b> | <b>Christians</b> | <b>Others</b>  |             |              |
| 15q59                                          | 0.1466           | 0.1286         | 0.1326            | 0.1453         |             |              |
| 0q70                                           | 0.3473           | 0.3412         | 0.3164            | 0.3089         |             |              |
| <b>Region</b>                                  | <b>Northeast</b> | <b>East</b>    | <b>North</b>      | <b>Central</b> | <b>West</b> | <b>South</b> |
| 15q59                                          | 0.1671           | 0.1520         | 0.1291            | 0.1575         | 0.1292      | 0.1380       |
| 0q70                                           | 0.3851           | 0.3636         | 0.2935            | 0.3724         | 0.3029      | 0.3493       |

Table: 6. Probability of death at age 15-59 and premature mortality at age 70 among different categories of caste, religion and region by sex in India

| Probability of dying between n to x+n Interval        | SC               |               | ST             |               | OBC               |               | Others         |               |             |               |              |               |
|-------------------------------------------------------|------------------|---------------|----------------|---------------|-------------------|---------------|----------------|---------------|-------------|---------------|--------------|---------------|
| <b>Caste</b>                                          | <b>Male</b>      | <b>Female</b> | <b>Male</b>    | <b>Female</b> | <b>Male</b>       | <b>Female</b> | <b>Male</b>    | <b>Female</b> |             |               |              |               |
| 15q59                                                 | 0.2097           | 0.1201        | 0.2263         | 0.1307        | 0.1754            | 0.1064        | 0.1593         | 0.0861        |             |               |              |               |
| 0q70                                                  | 0.4430           | 0.3157        | 0.4567         | 0.2979        | 0.3923            | 0.2929        | 0.3478         | 0.2512        |             |               |              |               |
| <b>Religion</b>                                       | <b>Hindus</b>    |               | <b>Muslims</b> |               | <b>Christians</b> |               | <b>Others</b>  |               |             |               |              |               |
| 15q59                                                 | 0.1866           | 0.1067        | 0.1523         | 0.1059        | 0.1815            | 0.0869        | 0.1842         | 0.1065        |             |               |              |               |
| 0q70                                                  | 0.4018           | 0.2886        | 0.3828         | 0.2967        | 0.3888            | 0.2394        | 0.3606         | 0.2542        |             |               |              |               |
| <b>Probability of dying between n to x+n Interval</b> | <b>Northeast</b> |               | <b>East</b>    |               | <b>North</b>      |               | <b>Central</b> |               | <b>West</b> |               | <b>South</b> |               |
| <b>Regions</b>                                        | <b>Male</b>      | <b>Female</b> | <b>Male</b>    | <b>Female</b> | <b>Male</b>       | <b>Female</b> | <b>Male</b>    | <b>Female</b> | <b>Male</b> | <b>Female</b> | <b>Male</b>  | <b>Female</b> |
| 15q59                                                 | 0.2142           | 0.1197        | 0.1795         | 0.1253        | 0.1655            | 0.0925        | 0.1879         | 0.1271        | 0.1753      | 0.0830        | 0.1884       | 0.0891        |
| 0q70                                                  | 0.4464           | 0.3144        | 0.3945         | 0.3318        | 0.3500            | 0.2321        | 0.4179         | 0.3233        | 0.3655      | 0.2353        | 0.4234       | 0.2683        |

## DECLARATION FOR DOUBLE BLIND

### Availability of Data and Material

Data are available in a public, open access repository

(<https://dhsprogram.com/what-we-do/survey/survey-display-355.cfm>), and

[http://www.censusindia.gov.in/vital\\_statistics/Appendix\\_SRS\\_Based\\_Life\\_Table.html](http://www.censusindia.gov.in/vital_statistics/Appendix_SRS_Based_Life_Table.html)

**Funding:** The authors have not declared a specific grant for this research from any funding agency in the public, commercial or not-for-profit sectors.

**Contributors:** Meena Kumari<sup>#</sup> and Sanjay Kumar Mohanty conceptualized the paper, prepared the analytical plan and wrote the paper.

<sup>#</sup> Corresponding author: meenaiips@gmail.com

International Institute for Population Sciences, Mumbai

**Competing Interests:** None

**Provenance and peer review:** Not commissioned; externally peer reviewed.

**Acknowledgements:** Authors thank editor and reviewers for their useful suggestions in revising the earlier draft. Authors also thank Mr. Suyash Mishra for his useful comments and suggestions.

## References

- 1 WHO. World Health Statistics 2016 Monitoring health For The SDGs. Geneva: 2016.
- 2 Gerry CJ, Raskina Y, Tsyplakova D. Convergence or Divergence? Life Expectancy Patterns in Post-communist Countries, 1959-2010. *Soc Indic Res* 2018;**140**:309–32. doi:10.1007/s11205-017-1764-4
- 3 Joe W, Liou L, Subramanian S V. Increasing global heterogeneity in the life expectancy of older populations. *bioRxiv* 2019;:589630. doi:10.1101/589630
- 4 Wilson C. Understanding Global Demographic Convergence since 1950. *Popul Dev Rev* 2011;**37**:375–88. doi:10.1111/j.1728-4457.2011.00415.x
- 5 McMichael AJ, McKee M, Shkolnikov V, *et al.* Mortality trends and setbacks: global convergence or divergence? *Lancet* 2004;**363**:1155–9. doi:https://doi.org/10.1016/S0140-6736(04)15902-3
- 6 Moser K, Shkolnikov VM, Leon DA. World Mortality 1950–2000: Divergence Replaces Convergence from the Late 1980s BT - HIV, Resurgent Infections and Population Change in Africa. In: Caraël M, Glynn JR, eds. . Dordrecht: : Springer Netherlands 2007. 11–25.

- 1  
2  
3 doi:10.1007/978-1-4020-6174-5\_1  
4  
5  
6 7 Wang H, Naghavi M, Allen C, *et al.* Global, regional, and national life expectancy, all-cause  
7 mortality, and cause-specific mortality for 249 causes of death, 1980–2015: a systematic  
8 analysis for the Global Burden of Disease Study 2015. *Lancet* 2016;**388**:1459–544.  
9 doi:[https://doi.org/10.1016/S0140-6736\(16\)31012-1](https://doi.org/10.1016/S0140-6736(16)31012-1)
- 10  
11 8 Division UND of IE and SAP. Sex differentials in survivorship in the developing world:  
12 levels, regional patterns and demographic determinants. *Popul Bull UN* 1988;:51.
- 13  
14 9 Gleit DA, Horiuchi S. The Narrowing Sex Differential in Life Expectancy in High-Income  
15 Populations: Effects of Differences in the Age Pattern of Mortality. *Popul Stud (NY)*  
16 2007;**61**:141–59.<http://www.jstor.org/stable/27643410>
- 17  
18 10 Zanfongnon R, Bourbeau R. Sex Differential in Life Expectancy at Birth in Canada, 1921-  
19 2004: Provincial Variations. 2008.
- 20  
21 11 Dubey M, Ram U, Ram F. Threshold Levels of Infant and Under-Five Mortality for Crossover  
22 between Life Expectancies at Ages Zero, One and Five in India: A Decomposition Analysis.  
23 *PLoS One* 2015;**10**:e0143764.<https://doi.org/10.1371/journal.pone.0143764>
- 24  
25 12 Singh A, Ladusingh L. Life expectancy at birth and life disparity: an assessment of sex  
26 differentials in mortality in India. *Int J Popul Stud* 2016;**2**. doi:10.18063/IJPS.2016.01.005
- 27  
28 13 Dicker D, Nguyen G, Abate D, *et al.* Global, regional, and national age-sex-specific mortality  
29 and life expectancy, 1950-2017: a systematic analysis for the Global Burden of Disease Study  
30 2017. *Lancet* 2018;**392**:1684–735. doi:10.1016/S0140-6736(18)31891-9
- 31  
32 14 Bassett MT, Krieger N. Social class and black-white differences in breast cancer survival. *Am*  
33 *J Public Health* 1986;**76**:1400–3. doi:10.2105/ajph.76.12.1400
- 34  
35 15 Keil JE, Sutherland SE, Knapp RG, *et al.* Does equal socioeconomic status in black and white  
36 men mean equal risk of mortality? *Am J Public Health* 1992;**82**:1133–6.  
37 doi:10.2105/ajph.82.8.1133
- 38  
39 16 Hummer RA, Rogers RG, Eberstein IW. Sociodemographic Differentials in Adult Mortality: A  
40 Review of Analytic Approaches. *Popul Dev Rev* 1998;**24**:553–78. doi:10.2307/2808154
- 41  
42 17 Wagstaff A. Socioeconomic inequalities in child mortality: comparisons across nine  
43 developing countries. *Bull World Health Organ* 2000;**78**:19–29.
- 44  
45 18 Dowd K, Blake D, Cairns AJG. Facing up to uncertain life expectancy: The longevity fan  
46 charts. *Demography* 2010;**47**:67–78. doi:10.1353/dem.0.0083
- 47  
48 19 Singh A, Pathak PK, Chauhan RK, *et al.* Infant and Child Mortality in India in the Last Two  
49 Decades: A Geospatial Analysis. *PLoS One*  
50 2011;**6**:e26856.<https://doi.org/10.1371/journal.pone.0026856>
- 51  
52 20 Eggleston KN, Fuchs VR. The New Demographic Transition: Most Gains in Life Expectancy  
53 Now Realized Late in Life. *J Econ Perspect* 2012;**26**:137–56. doi:10.1257/jep.26.3.137
- 54  
55 21 Fenelon A. Geographic Divergence in Mortality in the United States. *Popul Dev Rev*  
56 2013;**39**:611–34. doi:10.1111/j.1728-4457.2013.00630.x
- 57  
58 22 Gordon E-S, Haklai Z, Meron J, *et al.* Regional variations in mortality and causes of death in  
59  
60

- 1  
2  
3 Israel, 2009-2013. *Isr J Health Policy Res* 2017;**6**:39. doi:10.1186/s13584-017-0164-1  
4
- 5 23 Liu L, Chu Y, Oza S, *et al.* National, regional, and state-level all-cause and cause-specific  
6 under-5 mortality in India in 2000–15: a systematic analysis with implications for the  
7 Sustainable Development Goals. *Lancet Glob Heal* 2019;**7**:e721–34. doi:10.1016/S2214-  
8 109X(19)30080-4  
9
- 10 24 Montgomery AL, Ram U, Kumar R, *et al.* Maternal mortality in India: causes and healthcare  
11 service use based on a nationally representative survey. *PLoS One* 2014;**9**:e83331–e83331.  
12 doi:10.1371/journal.pone.0083331  
13
- 14 25 Knudson A, Meit M, Tanenbaum E, *et al.* Exploring rural and urban mortality differences.  
15 *Bethseda Rural Heal Reform Policy Res Cent* 2015.  
16
- 17 26 Saikia N. Trends in Mortality Differentials in India. 2016. 55–71. doi:10.1007/978-3-319-  
18 24783-0\_3  
19
- 20 27 Chakraborti B. Rural-urban mortality differential in Indian states: effect of environmental  
21 inequality and associated factors. *Rural Demogr* 1982;**9**:1–6.  
22
- 23 28 Hartley D. Rural health disparities, population health, and rural culture. *Am J Public Health*  
24 2004;**94**:1675–8. doi:10.2105/ajph.94.10.1675  
25
- 26 29 Singh GK, Siahpush M. Widening Rural–Urban Disparities in Life Expectancy, U.S., 1969–  
27 2009. *Am J Prev Med* 2014;**46**:e19–29. doi:https://doi.org/10.1016/j.amepre.2013.10.017  
28
- 29 30 Shah VR, Christian DS, Prajapati AC, *et al.* Quality of life among elderly population residing  
30 in urban field practice area of a tertiary care institute of Ahmedabad city, Gujarat. *J Fam Med*  
31 *Prim care* 2017;**6**:101–5. doi:10.4103/2249-4863.214965  
32
- 33 31 Krishnaji N, James KS. Gender differentials in adult mortality: with notes on rural-urban  
34 contrasts. *Econ Polit Wkly* 2002;:4633–7.  
35
- 36 32 Saikia N, Jasilionis D, Ram F, *et al.* Trends in geographical mortality differentials in India.  
37 *Rostock Max Planck Inst Demogr Res* 2009.  
38
- 39 33 Ram U, Jha P, Gerland P, *et al.* Age-specific and sex-specific adult mortality risk in India in  
40 2014: analysis of 0–27 million nationally surveyed deaths and demographic estimates from  
41 597 districts. *Lancet Glob Heal* 2015;**3**:e767–75.  
42
- 43 34 Kannan KP, Thankappan KR, Ramankutty V, *et al.* Kerala: a unique model of development.  
44 *Health Millions* 1991;**17**:30–3.  
45
- 46 35 Pal P, Ghosh J. Inequality in India: A survey of recent trends. 2007.  
47
- 48 36 Sen A. Development as freedom (1999). *Roberts, JT, Hite, AB Chorev, N Glob Dev Read*  
49 *Perspect Dev Glob Chang* 2014;**2**:525–47.  
50
- 51 37 Wang H, Abajobir AA, Abate KH, *et al.* Global, regional, and national under-5 mortality,  
52 adult mortality, age-specific mortality, and life expectancy, 1970-2016: a systematic analysis  
53 for the Global Burden of Disease Study 2016. *Lancet* 2017;**390**:1084–150. doi:10.1016/S0140-  
54 6736(17)31833-0  
55
- 56 38 Mohindra KS, Haddad S, Narayana D. Women’s health in a rural community in Kerala, India:  
57 do caste and socioeconomic position matter? *J Epidemiol Community Health* 2006;**60**:1020 LP  
58  
59  
60

- 1026. doi:10.1136/jech.2006.047647
- 39 Subramanian S V, Ackerson LK, Subramanyam MA, *et al.* Health Inequalities in India: The Axes of Stratification. *Brown J World Aff* 2008;**14**:127–38. <http://www.jstor.org/stable/24590719>
- 40 Vart P, Jaglan A, Shafique K. Caste-based social inequalities and childhood anemia in India: results from the National Family Health Survey (NFHS) 2005–2006. *BMC Public Health* 2015;**15**:537. doi:10.1186/s12889-015-1881-4
- 41 Mackenbach JP, Kunst AE. Measuring the magnitude of socio-economic inequalities in health: An overview of available measures illustrated with two examples from Europe. *Soc Sci Med* 1997;**44**:757–71. doi:[https://doi.org/10.1016/S0277-9536\(96\)00073-1](https://doi.org/10.1016/S0277-9536(96)00073-1)
- 42 Kakwani N, Wagstaff A, Van Doorslaer E. Socioeconomic inequalities in health: measurement, computation, and statistical inference. *J Econom* 1997;**77**:87–103.
- 43 Burström K, Johannesson M, Diderichsen F. Increasing socio-economic inequalities in life expectancy and QALYs in Sweden 1980–1997. *Health Econ* 2005;**14**:831–50. doi:10.1002/hec.977
- 44 Subramanian S V, Smith GD, Subramanyam M. Indigenous Health and Socioeconomic Status in India. *PLOS Med* 2006;**3**:e421. <https://doi.org/10.1371/journal.pmed.0030421>
- 45 Lorant V, Croux C, Weich S, *et al.* Depression and socio-economic risk factors: 7-year longitudinal population study. *Br J Psychiatry* 2007;**190**:293–8. doi:DOI: 10.1192/bjp.bp.105.020040
- 46 Malhotra C, Do YK. Socio-economic disparities in health system responsiveness in India. *Health Policy Plan* 2013;**28**:197–205. doi:10.1093/heapol/czs051
- 47 Asaria M, Mazumdar S, Chowdhury S, *et al.* Socioeconomic inequality in life expectancy in India. *BMJ Glob Heal* 2019;**4**:e001445.
- 48 Mohanty SK, Ram F. Life Expectancy At Birth Among Social and Economic Groups in India. IIPS Res. Br. 2010. [http://iipsindia.org/pdf/RB-13 file for uploading.pdf](http://iipsindia.org/pdf/RB-13_file_for_uploading.pdf) (accessed 1 Nov 2016).
- 49 Coffey D, Deshpande A, Hammer J, *et al.* Local Social Inequality, Economic Inequality, and Disparities in Child Height in India. *Demography* 2019;**56**:1427–52. doi:10.1007/s13524-019-00794-2
- 50 LoPalo M, Coffey D, Spears D. The Consequences of Social Inequality for the Health and Development of India’s Children: The Case of Caste, Sanitation, and Child Height. *Soc Justice Res* 2019;**32**:239–54. doi:10.1007/s11211-019-00323-x
- 51 Patel P, Das M, Das U. The perceptions, health-seeking behaviours and access of Scheduled Caste women to maternal health services in Bihar, India. *Reprod Health Matters* 2018;**26**:114–25.
- 52 Acharya SS. Health Equity in India: An Examination Through the Lens of Social Exclusion. *J Soc Incl Stud* 2018;**4**:104–30. doi:10.1177/2394481118774489
- 53 Khubchandani J, Soni A, Fahey N, *et al.* Caste matters: perceived discrimination among women in rural India. *Arch Womens Ment Health* 2018;**21**:163–70.

- 1  
2  
3 54 George S. *Caste and Care: Is Indian Healthcare Delivery System Favourable for Dalits?*  
4 Institute for Social and Economic Change 2015.  
5
- 6 55 Malhotra R, Rajan I, Syam S, *et al.* SOCIAL GROUP DISPARITIES IN LIFE  
7 EXPECTANCY AND ACTIVE LIFE EXPECTANCY AMONG OLDER PERSONS IN  
8 KERALA, INDIA. *Innov Aging* 2018;**2**:230. doi:10.1093/geroni/igy023.855  
9
- 10 56 Guillot M, Gavrilova N, Torgasheva L, *et al.* Divergent paths for adult mortality in Russia and  
11 Central Asia: evidence from Kyrgyzstan. *PLoS One* 2013;**8**:e75314.  
12
- 13 57 Preston Samuel H, Patrick H, Michel G. *Demography: measuring and modeling population*  
14 *processes. MA Blackwell Publ* 2001.  
15
- 16 58 Chiang CL. On Constructing Current Life Tables. *J Am Stat Assoc* 1972;**67**:538–41.  
17 doi:10.1080/01621459.1972.10481245  
18
- 19 59 Schoen R. Calculating Life Tables by Estimating Chiang's a From Observed Rates.  
20 *Demography* 1978;**15**:625–35. doi:10.2307/2061212  
21
- 22 60 Subramanian S V, Nandy S, Irving M, *et al.* The Mortality Divide in India: The Differential  
23 Contributions of Gender, Caste, and Standard of Living Across the Life Course. *Am J Public*  
24 *Health* 2006;**96**:818–25. doi:10.2105/AJPH.2004.060103  
25
- 26 61 Borooah VK, Dubey A, Iyer S. The Effectiveness of Jobs Reservation: Caste, Religion and  
27 Economic Status in India. *Dev Change* 2007;**38**:423–45. doi:10.1111/j.1467-  
28 7660.2007.00418.x  
29
- 30 62 Vijayanath V, Anitha MR, Vijayamahantesh SN, *et al.* Caste and health in Indian Scenario. *J*  
31 *Punjab Acad Forensic Med Toxicol* 2010;**10**:42–4.  
32
- 33 63 Saikia N, Bora JK. Does Increasing Longevity Lead Increasing Disability? Evidence from  
34 Indian States. *Soc Chang Dev* 2016;**13**.  
35
- 36 64 IIPS, ORC Macro. *National Family Health Survey (NFHS-3) 2005-2006.* Mumbai: 2007.  
37
- 38 65 Norheim OF, Jha P, Admasu K, *et al.* Avoiding 40% of the premature deaths in each country,  
39 2010–30: review of national mortality trends to help quantify the UN Sustainable  
40 Development Goal for health. *Lancet* 2015;**385**:239–52.  
41
- 42 66 Liu L, Hill K, Oza S, *et al.* Levels and causes of mortality under age five years. *Int Bank*  
43 *Reconstr Dev World Bank Reprod Matern newborn, child Heal Dis Control priorities*  
44 2015;**2**:71–83.  
45
- 46 67 Masquelier B, Hug L, Sharrow D, *et al.* Global, regional, and national mortality trends in older  
47 children and young adolescents (5&#x2013;14 years) from 1990 to 2016: an analysis of  
48 empirical data. *Lancet Glob Heal* 2018;**6**:e1087–99. doi:10.1016/S2214-109X(18)30353-X  
49  
50  
51  
52  
53  
54  
55  
56  
57  
58  
59  
60

1  
2  
3  
4  
5  
6  
7  
8  
9  
10  
11  
12  
13  
14  
15  
16  
17  
18  
19  
20  
21  
22  
23  
24  
25  
26  
27  
28  
29  
30  
31  
32  
33  
34  
35  
36  
37  
38  
39  
40  
41  
42  
43  
44  
45  
46  
47  
48  
49  
50  
51  
52  
53  
54  
55  
56  
57  
58  
59  
60

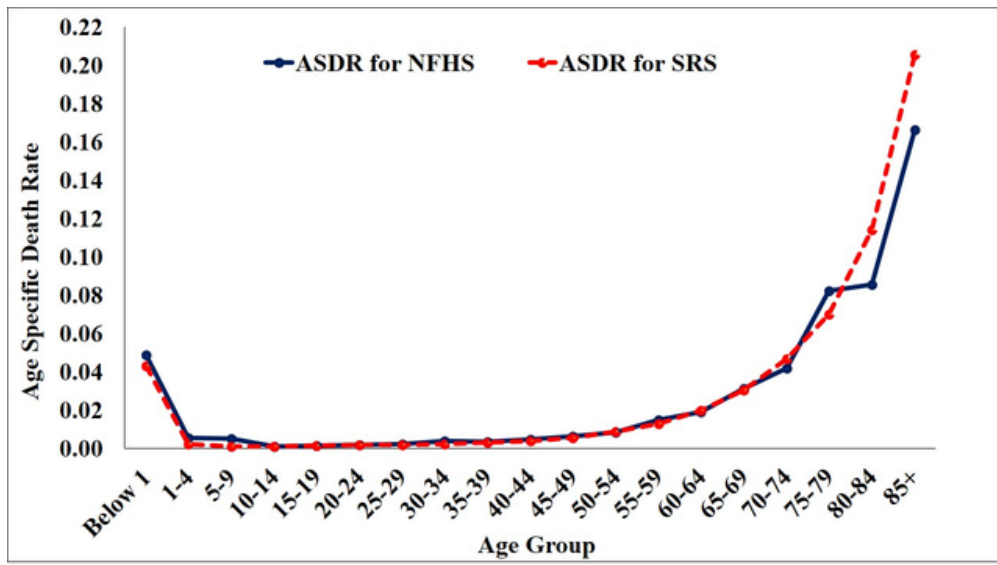

Figure 1: Age-specific Death Rate from NFHS-4 and SRS, 2011-2015, in India

54x30mm (300 x 300 DPI)

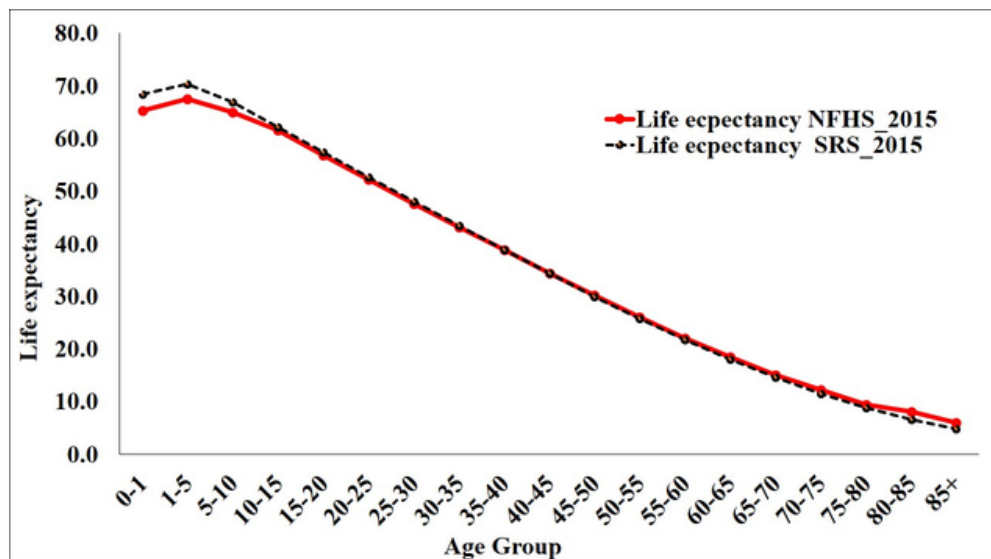

Figure 2: Estimated life expectancy at birth from NFHS-4, 2015-16 and SRS, 2011-15, in India

54x30mm (300 x 300 DPI)



1  
2  
3  
4  
5  
6  
7  
8  
9  
10  
11  
12  
13  
14  
15  
16  
17  
18  
19  
20  
21  
22  
23  
24  
25  
26  
27  
28  
29  
30  
31  
32  
33  
34  
35  
36  
37  
38  
39  
40  
41  
42  
43  
44  
45  
46  
47  
48  
49  
50  
51  
52  
53  
54  
55  
56  
57  
58  
59  
60

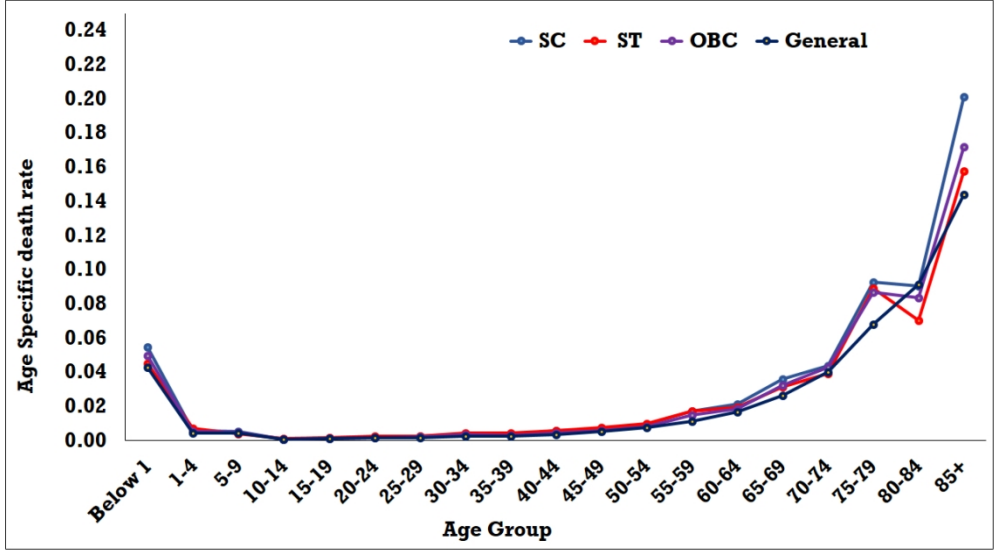

Figure 3: Age-specific death rate across caste groups in India, 2015-16

108x60mm (300 x 300 DPI)

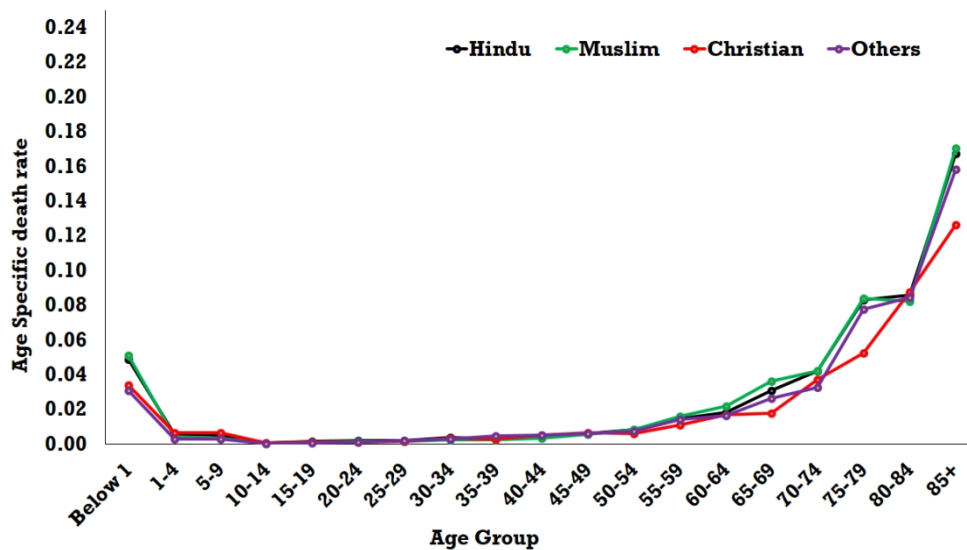

Figure 4: Age-specific death rate by religion in India, 2015-16

108x60mm (300 x 300 DPI)

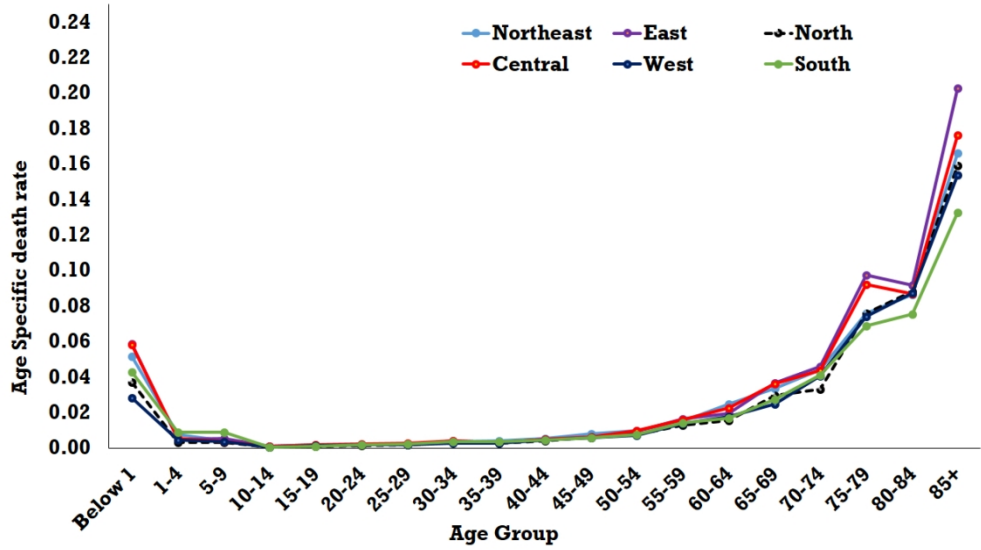

Figure 5: Age-specific death rate across regions in India, 2015-16

108x60mm (300 x 300 DPI)

## Appendices

Appendix Table 1: 95% Confidence interval (CIs) of life expectancy by caste and sex in India, 2015-16

| Age Group      | SC          |             |             | ST          |             |             | OBC         |             |             | Other       |             |             |
|----------------|-------------|-------------|-------------|-------------|-------------|-------------|-------------|-------------|-------------|-------------|-------------|-------------|
|                | Total       | Male        | Female      |
| <b>Below 1</b> | 62.60-63.64 | 59.65-61.00 | 65.57-67.07 | 63.25-64.88 | 59.49-61.63 | 66.85-68.99 | 64.69-65.42 | 62.38-63.40 | 66.98-67.99 | 67.44-68.45 | 65.34-66.74 | 69.25-70.64 |
| <b>1</b>       | 65.21-66.13 | 62.48-63.74 | 67.83-69.22 | 65.24-66.70 | 61.97-63.87 | 68.24-70.48 | 67.04-67.69 | 64.82-65.72 | 69.15-70.10 | 69.48-70.32 | 67.48-68.78 | 71.24-72.45 |
| <b>5</b>       | 62.66-63.54 | 60.04-61.22 | 65.36-66.6  | 63.17-64.53 | 60.04-61.95 | 66.06-68.16 | 64.52-65.12 | 62.39-63.23 | 66.58-67.46 | 66.67-67.53 | 64.70-65.93 | 68.46-69.62 |
| <b>10</b>      | 59.29-60.12 | 56.66-57.78 | 61.93-63.10 | 59.39-60.70 | 56.33-58.14 | 62.23-64.22 | 61.16-61.71 | 59.02-59.80 | 63.22-64.02 | 63.22-63.96 | 61.35-62.42 | 64.92-65.95 |
| <b>15</b>      | 54.56-55.34 | 51.90-53.03 | 57.22-58.41 | 54.66-56.08 | 51.60-53.44 | 57.58-59.49 | 56.39-56.95 | 54.22-55.03 | 58.46-59.27 | 58.39-59.15 | 56.51-57.60 | 60.04-61.10 |
| <b>20</b>      | 49.98-50.79 | 47.36-48.45 | 52.59-53.76 | 50.20-51.51 | 47.09-48.91 | 53.06-54.90 | 51.75-52.30 | 49.60-50.36 | 53.88-54.63 | 53.74-54.45 | 51.83-52.90 | 55.46-56.48 |
| <b>25</b>      | 45.49-46.27 | 42.89-43.93 | 48.00-49.22 | 45.78-47.14 | 42.76-44.52 | 48.75-50.53 | 47.23-47.77 | 45.09-45.83 | 49.32-50.09 | 49.17-49.86 | 47.24-48.30 | 50.95-51.91 |
| <b>30</b>      | 41.07-41.84 | 38.57-39.58 | 43.51-44.66 | 41.39-42.72 | 38.45-40.23 | 44.24-46.05 | 42.69-43.23 | 40.66-41.42 | 44.70-45.44 | 44.56-45.28 | 42.75-43.79 | 46.26-47.17 |
| <b>35</b>      | 36.89-37.64 | 34.52-35.51 | 39.23-40.28 | 37.32-38.59 | 34.61-36.20 | 39.94-41.62 | 38.44-38.96 | 36.53-37.25 | 40.33-41.04 | 40.13-40.81 | 38.45-39.51 | 41.62-42.60 |
| <b>40</b>      | 32.51-33.23 | 30.35-31.35 | 34.62-35.70 | 33.13-34.35 | 30.51-32.24 | 35.41-37.18 | 34.02-34.54 | 32.29-32.97 | 35.72-36.45 | 35.62-36.30 | 34.14-35.13 | 36.93-37.88 |
| <b>45</b>      | 28.41-29.11 | 26.53-27.45 | 30.23-31.28 | 29.06-30.27 | 26.61-28.22 | 31.24-32.93 | 29.71-30.21 | 28.14-28.87 | 31.20-31.91 | 31.23-31.89 | 29.89-30.90 | 32.35-33.29 |
| <b>50</b>      | 24.32-25.02 | 22.59-23.52 | 25.92-27.02 | 25.09-26.29 | 22.95-24.60 | 26.99-28.64 | 25.56-26.03 | 24.24-24.90 | 26.79-27.48 | 27.00-27.62 | 25.85-26.77 | 27.95-28.83 |
| <b>55</b>      | 20.44-21.08 | 19.02-19.90 | 21.76-22.77 | 21.35-22.44 | 19.56-21.11 | 22.78-24.45 | 21.53-21.99 | 20.41-21.03 | 22.58-23.22 | 22.98-23.62 | 22.32-23.19 | 23.53-24.42 |
| <b>60</b>      | 17.07-17.71 | 15.84-16.72 | 18.20-19.20 | 18.07-19.22 | 16.69-18.21 | 19.11-20.78 | 18.01-18.48 | 17.12-17.73 | 18.82-19.47 | 19.21-19.82 | 18.73-19.59 | 19.54-20.37 |
| <b>65</b>      | 13.77-14.42 | 12.81-13.62 | 14.61-15.61 | 14.78-15.87 | 13.74-15.32 | 15.37-16.96 | 14.58-15.02 | 13.84-14.43 | 15.17-15.84 | 15.72-16.29 | 15.41-16.25 | 15.86-16.69 |
| <b>70</b>      | 11.07-11.70 | 10.32-11.16 | 11.65-12.57 | 11.92-13.06 | 10.95-12.54 | 12.42-14.15 | 11.72-12.17 | 11.17-11.73 | 12.17-12.86 | 12.62-13.23 | 12.43-13.33 | 12.69-13.50 |
| <b>75</b>      | 8.26-8.90   | 7.59-8.43   | 8.67-9.61   | 9.06-10.22  | 8.29-9.91   | 9.36-11.03  | 9.00-9.43   | 8.55-9.15   | 9.30-9.92   | 9.98-10.54  | 9.90-10.81  | 9.90-10.68  |
| <b>80</b>      | 6.96-7.46   | 6.29-7.02   | 7.39-8.15   | 8.23-9.17   | 7.54-9.02   | 8.47-9.68   | 7.77-8.13   | 7.26-7.75   | 8.12-8.64   | 8.19-8.69   | 8.29-9.06   | 8.03-8.64   |
| <b>85+</b>     | 4.97-4.97   | 4.47-4.47   | 5.43-5.43   | 6.35-6.35   | 6.32-6.32   | 6.38-6.38   | 5.82-5.82   | 5.46-5.46   | 6.15-6.15   | 6.95-6.95   | 7.97-7.97   | 6.28-6.28   |

Appendix Table 2: 95% Confidence interval (CIs) of life expectancy by religion and sex in India, 2015-16

| Age Group      | Hindu       |             |             | Muslims     |             |             | Christian   |             |             | Others      |             |             |
|----------------|-------------|-------------|-------------|-------------|-------------|-------------|-------------|-------------|-------------|-------------|-------------|-------------|
|                | Total       | Male        | Female      |
| <b>Below 1</b> | 64.74-65.22 | 62.15-62.87 | 67.34-68.09 | 65.29-66.54 | 63.57-65.25 | 66.71-68.45 | 66.44-69.60 | 61.93-66.62 | 69.81-74.30 | 67.38-69.80 | 64.32-67.56 | 69.91-73.24 |
| <b>1</b>       | 66.99-67.46 | 64.65-65.25 | 69.38-70.05 | 67.73-68.87 | 66.07-67.62 | 69.14-70.71 | 67.96-70.95 | 63.76-68.03 | 71.29-75.40 | 68.64-70.95 | 65.81-68.96 | 70.87-73.95 |
| <b>5</b>       | 64.53-64.97 | 62.22-62.84 | 66.83-67.48 | 65.00-66.10 | 63.20-64.69 | 66.52-68.10 | 65.83-68.64 | 62.17-66.13 | 68.45-72.32 | 65.57-67.66 | 63.04-66.00 | 67.43-70.38 |
| <b>10</b>      | 61.20-61.59 | 62.22-62.84 | 63.48-64.09 | 61.10-62.16 | 59.35-60.77 | 62.57-64.08 | 63.16-65.66 | 60.19-63.84 | 65.19-68.75 | 61.64-63.61 | 58.83-61.68 | 63.56-66.34 |
| <b>15</b>      | 56.42-56.83 | 54.13-54.70 | 58.73-59.32 | 56.29-57.34 | 54.49-55.91 | 57.85-59.37 | 58.35-60.91 | 55.44-59.05 | 60.40-63.75 | 56.73-58.67 | 54.03-56.72 | 58.73-61.46 |
| <b>20</b>      | 51.84-52.23 | 49.53-50.10 | 54.17-54.73 | 51.60-52.65 | 49.91-51.39 | 53.13-54.63 | 53.85-56.25 | 50.80-54.27 | 55.81-59.24 | 51.99-53.88 | 49.34-52.14 | 53.94-56.60 |
| <b>25</b>      | 47.32-47.70 | 45.03-45.56 | 49.63-50.18 | 47.12-48.10 | 45.34-46.75 | 48.57-50.05 | 49.04-51.56 | 45.97-49.55 | 51.18-54.66 | 47.34-49.23 | 44.85-47.72 | 49.12-51.86 |
| <b>30</b>      | 42.81-43.20 | 40.62-41.17 | 45.07-45.60 | 42.42-43.45 | 40.78-42.16 | 43.90-45.38 | 44.56-46.86 | 41.71-45.07 | 46.49-49.82 | 42.81-44.80 | 40.40-43.24 | 44.54-47.38 |
| <b>35</b>      | 38.57-38.96 | 36.59-37.10 | 40.61-41.17 | 38.01-38.99 | 36.40-37.75 | 39.33-40.82 | 40.29-42.74 | 37.38-40.73 | 42.33-45.52 | 38.42-40.37 | 36.48-39.11 | 40.04-42.61 |
| <b>40</b>      | 34.17-34.54 | 32.34-32.87 | 36.02-36.56 | 33.49-34.51 | 32.01-33.35 | 34.83-36.23 | 35.98-38.23 | 33.27-36.70 | 37.57-40.76 | 34.46-36.33 | 32.34-34.82 | 35.89-38.42 |
| <b>45</b>      | 29.92-30.29 | 28.31-28.80 | 31.55-32.07 | 29.07-30.02 | 27.65-28.90 | 30.32-31.71 | 31.76-34.00 | 29.71-32.73 | 33.34-36.20 | 30.30-32.15 | 28.57-31.02 | 31.43-33.98 |
| <b>50</b>      | 25.78-26.14 | 24.36-24.83 | 27.18-27.70 | 24.88-25.82 | 23.53-24.82 | 25.91-27.27 | 27.86-30.05 | 25.97-29.02 | 28.70-31.96 | 26.30-27.99 | 24.58-27.02 | 27.25-29.64 |
| <b>55</b>      | 21.80-22.14 | 20.72-21.16 | 22.88-23.37 | 20.87-21.73 | 19.70-20.93 | 21.76-23.12 | 23.74-25.86 | 22.42-25.27 | 24.21-27.32 | 22.25-23.88 | 20.92-23.23 | 22.94-25.38 |
| <b>60</b>      | 18.29-18.60 | 17.42-17.85 | 19.13-19.61 | 17.44-18.31 | 16.50-17.68 | 18.11-19.46 | 19.96-22.08 | 18.54-21.62 | 20.57-23.57 | 18.74-20.36 | 17.90-20.05 | 19.01-21.43 |
| <b>65</b>      | 14.85-15.16 | 14.15-14.58 | 15.46-15.94 | 14.21-15.11 | 13.54-14.77 | 14.60-15.90 | 16.67-18.72 | 15.75-18.76 | 16.77-19.73 | 15.23-16.81 | 14.30-16.41 | 15.65-17.96 |
| <b>70</b>      | 11.95-12.27 | 11.38-11.82 | 12.41-12.90 | 11.66-12.57 | 11.17-12.48 | 11.81-13.10 | 13.08-15.14 | 12.44-15.37 | 12.94-15.93 | 12.12-13.70 | 11.45-13.57 | 12.27-14.46 |
| <b>75</b>      | 9.21-9.53   | 8.76-9.20   | 9.58-10.04  | 8.92-9.81   | 8.87-10.10  | 8.60-9.87   | 10.46-12.44 | 9.97-12.93  | 10.06-13.04 | 8.99-10.54  | 8.17-10.30  | 9.28-11.46  |
| <b>80</b>      | 7.84-8.11   | 7.41-7.80   | 8.15-8.51   | 7.68-8.36   | 7.44-8.52   | 7.52-8.59   | 8.26-10.10  | 8.15-10.52  | 7.66-10.22  | 7.66-8.89   | 6.93-8.77   | 7.97-9.46   |
| <b>85+</b>     | 5.97-5.97   | 5.85-5.85   | 6.09-6.09   | 5.86-5.86   | 5.86-5.86   | 5.89-5.89   | 7.91-7.91   | 7.89-7.89   | 7.96-7.96   | 6.32-6.32   | 6.68-6.68   | 6.06-6.06   |

Appendix Table 3: 95% Confidence interval (CIs) of life expectancy by regions and sex in India, 2015-16

| Age Group      | Northeast   |             |             | East        |             |             | North       |             |             |
|----------------|-------------|-------------|-------------|-------------|-------------|-------------|-------------|-------------|-------------|
|                | Total       | Male        | Female      | Total       | Male        | Female      | Total       | Male        | Female      |
| <b>Below 1</b> | 62.43-65.00 | 59.15-62.58 | 65.40-68.81 | 63.12-64.04 | 61.68-63.07 | 64.15-65.45 | 68.06-69.34 | 65.17-66.86 | 70.96-72.73 |
| <b>1</b>       | 65.02-67.28 | 61.94-65.26 | 67.38-70.95 | 65.95-66.82 | 64.62-65.79 | 66.95-68.18 | 69.68-70.83 | 66.99-68.52 | 72.37-73.93 |
| <b>5</b>       | 62.98-65.25 | 60.16-63.13 | 65.26-68.68 | 63.20-64.00 | 61.82-62.99 | 64.20-65.37 | 66.67-67.66 | 64.07-65.51 | 69.12-70.71 |
| <b>10</b>      | 59.13-61.32 | 56.34-59.35 | 61.65-64.83 | 59.82-60.58 | 58.44-59.54 | 60.88-61.98 | 62.62-63.66 | 60.05-61.46 | 65.11-66.52 |
| <b>15</b>      | 54.50-56.59 | 51.63-54.68 | 56.94-59.96 | 55.09-55.82 | 53.69-54.78 | 56.19-57.24 | 57.79-58.82 | 55.25-56.61 | 60.20-61.80 |
| <b>20</b>      | 50.04-52.05 | 47.20-50.05 | 52.30-55.35 | 50.49-51.26 | 49.08-50.19 | 51.60-52.64 | 53.13-54.09 | 50.57-51.92 | 55.65-57.10 |
| <b>25</b>      | 45.49-47.54 | 42.74-45.43 | 47.66-50.68 | 45.98-46.71 | 44.60-45.64 | 47.08-48.07 | 48.50-49.51 | 45.93-47.33 | 50.99-52.44 |
| <b>30</b>      | 41.00-43.05 | 38.32-41.08 | 43.20-46.19 | 41.44-42.14 | 40.12-41.13 | 42.47-43.48 | 43.88-44.89 | 41.41-42.78 | 46.24-47.72 |
| <b>35</b>      | 36.72-38.73 | 34.34-37.02 | 38.70-41.69 | 37.24-37.92 | 36.05-37.03 | 38.17-39.20 | 39.53-40.50 | 37.23-38.50 | 41.71-43.13 |
| <b>40</b>      | 32.39-34.38 | 30.10-32.76 | 34.39-37.26 | 32.82-33.49 | 31.85-32.80 | 33.57-34.56 | 35.08-36.03 | 32.92-34.16 | 37.17-38.58 |
| <b>45</b>      | 28.30-30.21 | 26.12-28.79 | 29.90-32.82 | 28.59-29.25 | 27.83-28.73 | 29.18-30.10 | 30.75-31.66 | 28.75-29.93 | 32.61-34.00 |
| <b>50</b>      | 24.34-26.22 | 22.57-25.10 | 25.66-28.40 | 24.42-25.03 | 23.78-24.59 | 24.85-25.79 | 26.64-27.55 | 24.82-26.01 | 28.28-29.61 |
| <b>55</b>      | 20.48-22.39 | 19.13-21.56 | 21.45-24.39 | 20.49-21.09 | 19.99-20.82 | 20.76-21.62 | 22.57-23.46 | 21.10-22.26 | 24.00-25.31 |
| <b>60</b>      | 16.93-18.84 | 15.87-18.25 | 17.62-20.61 | 17.05-17.62 | 16.69-17.51 | 17.19-18.02 | 18.98-19.78 | 17.86-18.93 | 19.94-21.25 |
| <b>65</b>      | 14.08-15.87 | 13.10-15.53 | 14.38-17.14 | 13.57-14.12 | 13.34-14.12 | 13.59-14.48 | 15.30-16.15 | 14.31-15.40 | 16.15-17.47 |
| <b>70</b>      | 11.39-13.15 | 10.72-13.14 | 11.26-14.00 | 10.85-11.42 | 10.61-11.39 | 10.91-11.73 | 12.44-13.28 | 11.59-12.62 | 13.13-14.39 |
| <b>75</b>      | 8.81-10.59  | 8.19-10.48  | 8.82-11.46  | 8.10-8.66   | 7.85-8.61   | 8.15-8.98   | 9.33-10.13  | 8.55-9.60   | 9.90-11.18  |
| <b>80</b>      | 7.28-8.73   | 6.85-8.72   | 7.11-9.36   | 6.93-7.38   | 6.89-7.53   | 6.83-7.46   | 7.80-8.43   | 6.86-7.76   | 8.45-9.44   |
| <b>85+</b>     | 6.01-6.01   | 5.74-5.74   | 6.29-6.29   | 4.94-4.94   | 5.18-5.18   | 4.74-4.74   | 6.28-6.28   | 5.63-5.63   | 6.95-6.95   |

Appendix Table 3 (Continued): 95% Confidence interval (CIs) of life expectancy by regions and sex in India, 2015-16

| Age Group      | Central     |             |             | West        |             |             | South       |             |             |
|----------------|-------------|-------------|-------------|-------------|-------------|-------------|-------------|-------------|-------------|
|                | Total       | Male        | Female      | Total       | Male        | Female      | Total       | Male        | Female      |
| <b>Below 1</b> | 63.29-64.20 | 61.16-62.50 | 65.20-66.66 | 68.07-69.21 | 65.42-67.09 | 70.40-72.12 | 64.30-65.40 | 60.18-61.74 | 68.43-70.03 |
| <b>1</b>       | 66.17-66.96 | 64.17-65.34 | 67.94-69.14 | 69.03-70.13 | 66.56-68.00 | 71.36-72.93 | 66.19-67.19 | 62.43-63.88 | 69.90-71.33 |
| <b>5</b>       | 63.56-64.34 | 61.49-62.56 | 65.48-66.66 | 66.27-67.30 | 63.80-65.16 | 68.55-70.09 | 64.53-65.50 | 61.23-62.53 | 67.82-69.15 |
| <b>10</b>      | 59.73-60.51 | 57.74-58.81 | 61.62-62.73 | 62.44-63.42 | 59.74-61.10 | 65.03-66.43 | 62.49-63.29 | 59.38-60.52 | 65.51-66.63 |
| <b>15</b>      | 55.02-55.75 | 52.97-54.06 | 56.88-58.01 | 57.62-58.51 | 54.86-56.16 | 60.20-61.56 | 57.68-58.46 | 54.60-55.73 | 60.65-61.85 |
| <b>20</b>      | 50.48-51.20 | 48.46-49.55 | 52.36-53.43 | 52.98-53.89 | 50.16-51.45 | 55.69-56.94 | 53.02-53.81 | 49.97-51.10 | 56.00-57.05 |
| <b>25</b>      | 46.06-46.78 | 44.05-45.08 | 47.93-48.98 | 48.39-49.29 | 45.55-46.87 | 51.14-52.44 | 48.42-49.19 | 45.42-46.56 | 51.32-52.41 |
| <b>30</b>      | 41.63-42.38 | 39.73-40.74 | 43.45-44.50 | 43.84-44.66 | 41.07-42.28 | 46.51-47.78 | 44.00-44.73 | 41.11-42.21 | 46.66-47.76 |
| <b>35</b>      | 37.41-38.14 | 35.71-36.66 | 39.07-40.10 | 39.45-40.30 | 36.82-38.02 | 41.92-43.17 | 39.72-40.47 | 37.14-38.18 | 42.19-43.23 |
| <b>40</b>      | 32.97-33.69 | 31.31-32.28 | 34.52-35.52 | 34.99-35.83 | 32.50-33.72 | 37.33-38.49 | 35.41-36.12 | 33.01-34.09 | 37.62-38.65 |
| <b>45</b>      | 28.77-29.44 | 27.24-28.16 | 30.17-31.13 | 30.70-31.55 | 28.48-29.67 | 32.73-33.95 | 31.14-31.84 | 29.06-30.01 | 33.08-34.10 |
| <b>50</b>      | 24.58-25.24 | 23.19-24.11 | 25.80-26.78 | 26.58-27.37 | 24.57-25.76 | 28.28-29.46 | 26.97-27.69 | 25.18-26.13 | 28.65-29.67 |
| <b>55</b>      | 20.68-21.32 | 19.56-20.41 | 21.72-22.70 | 22.45-23.24 | 21.00-22.10 | 23.72-24.87 | 22.96-23.63 | 21.50-22.45 | 24.28-25.26 |
| <b>60</b>      | 17.22-17.83 | 16.29-17.08 | 18.05-18.94 | 18.92-19.63 | 17.80-18.84 | 19.75-20.88 | 19.50-20.17 | 18.26-19.19 | 20.56-21.56 |
| <b>65</b>      | 14.02-14.61 | 13.29-14.10 | 14.58-15.51 | 15.47-16.23 | 14.60-15.59 | 16.03-17.20 | 16.01-16.67 | 15.07-15.99 | 16.73-17.73 |
| <b>70</b>      | 11.36-11.98 | 10.72-11.52 | 11.85-12.72 | 12.26-12.97 | 11.52-12.56 | 12.69-13.75 | 13.05-13.73 | 12.40-13.33 | 13.47-14.44 |
| <b>75</b>      | 8.61-9.20   | 8.05-8.84   | 9.00-9.83   | 9.54-10.29  | 9.11-10.16  | 9.64-10.73  | 10.54-11.23 | 10.17-11.11 | 10.64-11.63 |
| <b>80</b>      | 7.50-7.98   | 7.08-7.77   | 7.77-8.44   | 7.93-8.62   | 7.37-8.39   | 8.20-9.05   | 9.06-9.65   | 8.57-9.48   | 9.23-10.07  |
| <b>85+</b>     | 5.67-5.67   | 5.67-5.67   | 5.68-5.68   | 6.49-6.49   | 6.70-6.70   | 6.38-6.38   | 7.55-7.55   | 7.35-7.35   | 7.72-7.72   |

# BMJ Open

## Caste, religion and regional differentials in life expectancy at birth in India: cross sectional estimates from recent National Family Health Survey

|                                 |                                                                                                                                                                                        |
|---------------------------------|----------------------------------------------------------------------------------------------------------------------------------------------------------------------------------------|
| Journal:                        | <i>BMJ Open</i>                                                                                                                                                                        |
| Manuscript ID                   | bmjopen-2019-035392.R3                                                                                                                                                                 |
| Article Type:                   | Original research                                                                                                                                                                      |
| Date Submitted by the Author:   | 28-May-2020                                                                                                                                                                            |
| Complete List of Authors:       | Kumari, Meena; International Institute for Population Sciences, Fertility Studies<br>Mohanty, Sanjay; INTERNATIONAL INSTITUTE FOR POPULATION SCIENCES, DEPARTMENT OF FERTILITY STUDIES |
| <b>Primary Subject Heading</b>: | Public health                                                                                                                                                                          |
| Secondary Subject Heading:      | Global health, Epidemiology                                                                                                                                                            |
| Keywords:                       | PUBLIC HEALTH, EPIDEMIOLOGY, Adult intensive & critical care < INTENSIVE & CRITICAL CARE                                                                                               |
|                                 |                                                                                                                                                                                        |

SCHOLARONE™  
Manuscripts





I, the Submitting Author has the right to grant and does grant on behalf of all authors of the Work (as defined in the below author licence), an exclusive licence and/or a non-exclusive licence for contributions from authors who are: i) UK Crown employees; ii) where BMJ has agreed a CC-BY licence shall apply, and/or iii) in accordance with the terms applicable for US Federal Government officers or employees acting as part of their official duties; on a worldwide, perpetual, irrevocable, royalty-free basis to BMJ Publishing Group Ltd ("BMJ") its licensees and where the relevant Journal is co-owned by BMJ to the co-owners of the Journal, to publish the Work in this journal and any other BMJ products and to exploit all rights, as set out in our [licence](#).

The Submitting Author accepts and understands that any supply made under these terms is made by BMJ to the Submitting Author unless you are acting as an employee on behalf of your employer or a postgraduate student of an affiliated institution which is paying any applicable article publishing charge ("APC") for Open Access articles. Where the Submitting Author wishes to make the Work available on an Open Access basis (and intends to pay the relevant APC), the terms of reuse of such Open Access shall be governed by a Creative Commons licence – details of these licences and which [Creative Commons](#) licence will apply to this Work are set out in our licence referred to above.

Other than as permitted in any relevant BMJ Author's Self Archiving Policies, I confirm this Work has not been accepted for publication elsewhere, is not being considered for publication elsewhere and does not duplicate material already published. I confirm all authors consent to publication of this Work and authorise the granting of this licence.

# Caste, religion and regional differentials in life expectancy at birth in India: cross sectional estimates from recent National Family Health Survey

Meena Kumari, International Institute for Population Sciences (IIPS), Govandi Station Road, Deonar, Mumbai-400088

Email: meenaiips@gmail.com

Prof. Sanjay Kumar Mohanty, Department of Fertility Studies, International Institute for Population Sciences (IIPS) Mumbai-400088, India

Email: sanjayiips@yahoo.co.in

# Corresponding author: meenaiips@gmail.com

International Institute for Population Sciences, Mumbai

## **Word Count: 3238**

**Keywords:** Age-specific death rate, Life expectancy, Adult mortality, Premature mortality, Caste, Religion, Region, India

**Objective:** Though estimates of longevity are available by states, age, sex and place of residence in India, disaggregated estimates by social and economic groups are limited. This study, estimates the life expectancy at birth and premature mortality by caste, religion and regions of India.

**Design:** This study primarily used cross sectional data from the National Family Health Survey (NFHS-4), 2015-2016 and the Sample Registration System (SRS), 2011-2015. The NFHS-4 is the largest ever demographic and health survey covering 601,509 households and 811,808 individuals across all states and union territories in India.

**Measures:** The abridged life table is constructed to estimate the life expectancy at birth, adult mortality ( ${}_{45}q_{15}$ ) and premature mortality ( ${}_{70}q_0$ ) by caste, religion and region.

**Results:** Life expectancy at birth was estimated at 63.1 years [95% CI: 62.60-63.64] for Scheduled Castes (SC), 64.0 years [95% CI: 63.25-64.88] for Scheduled Tribes (ST), 65.1 years [95% CI: 64.69-65.42] for Other Backward Classes (OBC) and 68.0 years [95%: 67.44-68.45] for Others. It was higher among Others 68.6 years [95% CI: 67.38-69.80] followed by Christians 68.1 years [95% CI: 66.44-69.60] than Muslims 66.0 years [95% CI: 65.29-66.54] and Hindus 65.0 years [95% CI: 64.74-65.22]. Life expectancy at birth was higher among females than among males across social groups in India. Premature mortality was higher among SC (0.382), followed by ST (0.381), OBC (0.344) and Others (0.301). The regional variation in life expectancy by age and sex is large.

**Conclusion:** In India, social and religious differentials in life expectancy by sex are modest and need to be investigated among poor and rich within these groups. Premature mortality and adult mortality are also high across social and religious groups.

## **Strengths and Limitations of the Study**

- This is the first ever study that provides estimates of life expectancy, by caste, religion and region in India.
- It provides estimates of premature and adult mortality across social groups and regions in India.
- Disease burden, disability and cause of premature mortality have not been explored in this study.
- State specific estimates of life expectancy, premature mortality have not been estimated due to inadequate sample size.
- Estimates of mortality and longevity are not linked to socio-economic status in India.

## Introduction

Life expectancy at birth is one of the most frequently used summary measures of health. It is used to quantify the health dimension of the human development index [1]. Globally, life expectancy at birth is converging among and within countries [2–4]. Countries are also converging in infant mortality rate, under-five mortality rate and utilisation of basic health services [5–7]. Despite higher life expectancy at birth of females than male, findings from a large number of studies in developing countries suggest that females are disadvantaged in health and health care utilization [8–13]. Though life expectancy at birth has been rising in almost all societies, mortality differences exist within, as well as between, population sub-groups within national and regional boundaries [14–23]. Regional disparity in mortality is associated with socio-economic well-being and access to health care [24–26]. Conventionally, those with an urban residence and the economically and socially better off tend to have lower mortality and higher longevity [27–30].

India with a population of 1.35 billion in 2018 is experiencing significant improvement in health indicators. Life expectancy at birth has increased from 58.7 years in 1990 to 68.30 years in 2015 (RGI). The state variations in life expectancy have been narrowing down over the years. Although India has witnessed spectacular improvement in mortality, the changes in mortality conditions across the states have been different [26]. There is strong North-South gradient across the states, with great variations in the level and the pace of mortality reduction over time [31–33]. For instance, life expectancy was higher in Kerala than in Uttar Pradesh in India [34–37]; adult mortality and premature deaths were also high [33]. The national and state average in life expectancy conceal large variation among states and social groups in India.

Health, education, employment in India varies by social and economic groups in India. Caste and religion are often used as key social variables and given priority in national and state policies. The caste structure is also said to be associated with the economic well-being of the household. The population of India is classified into four caste groups, namely Scheduled Castes (SC), Scheduled Tribes (ST), Other Backward Classes (OBC) and Others. The ST population, accounting for 8.6% of the total population is the most deprived followed by SCs. A large number of studies have examined the caste differentials in health and health-care in India and its states, and found that the SC and ST population have poor health [38–40].

1  
2  
3 However, studies suggest that the increasing socio-economic inequality over the years has led  
4 to poor health outcomes among population sub-groups in the country [41–47].  
5  
6

7 The Sample Registration System (SRS) provides regular estimates of life expectancy at birth  
8 and age-specific death rate for major states, by sex and place of residence. However, such  
9 estimates are not available for social groups such as caste and religion and by economic  
10 groups. To our knowledge, there are few studies that provided the estimates of life  
11 expectancy by social group/economic group. Mohanty and Ram (2010) estimated life  
12 expectancy at birth among the social groups using NFHS-2 and NFHS-3 data and found that  
13 life expectancy at birth is similar among the poor across caste groups [48]. Recently Asaria et  
14 al. (2019) has provided estimates of life expectancy at birth across wealth quintiles using  
15 NFHS-4 data and found that life expectancy at birth among the poorest wealth quintile was  
16 65.1 years compared to 72.7 years in the richest wealth quintile.  
17  
18  
19  
20  
21

22 Patel (2018) explains that SC women may be inequitably served by maternal health services  
23 and in some cases, even face specific discrimination. Low health status is observed among  
24 poor, female, rural and specific minority groups of Scheduled Tribes and Scheduled Castes  
25 [49–52]. In comparison to the General castes, lower caste (OBC, SC/ST) women were more  
26 likely to experience discrimination in rural western India [53]. Lower caste women reported a  
27 higher prevalence of poorer health than women of higher castes [38,54]. At age 60, life  
28 expectancy, active life expectancy and inactive life expectancy estimates were significantly  
29 higher, by 2.3, 1.9 and 0.4 years, for older persons in the General castes group versus those in  
30 the SC/ST/OBC groups respectively [46,55]. Many studies support the finding that life  
31 expectancy was lower in the Central region than in other regions [40,56].  
32  
33  
34  
35

36 The national average in longevity conceals large variations across population sub-groups and  
37 by socio-economic characteristics. This is the first ever study that estimates the life  
38 expectancy and mortality pattern by caste, religion, region and sex in India.  
39  
40  
41

## 42 Data Sources

43 Data from the National Family Health Survey (NFHS-4), 2015-16 and the Sample  
44 Registration System (SRS), 2011-2015 have been used. The National Family Health Surveys  
45 (NFHS) are cross sectional study based on large-scale, multi-round surveys, conducted in a  
46 representative sample of households throughout India. The first round of NFHS was  
47 conducted in 1992-93 and the fourth round in 2015-16. The NFHS-4 covered 601,509  
48 households and 811,808 individuals. The NFHS provides reliable estimates of fertility, child  
49 mortality, family planning, child nutritional status and childhood morbidity for the country.  
50 With regard to mortality, NFHS 1, 2 and 3 were intended to provide reliable estimates of  
51 infant and child mortality. However, in NFHS-4, an attempt was made to capture overall  
52 mortality and data were collected at the national and district levels. It has the distinction of  
53 the largest ever population based health survey in the country.  
54  
55  
56  
57

58 Questions were asked on the death of any members of the household in a three-year reference  
59 period. A total of 74,945 deaths was recorded during the survey. Along with death records,  
60

data on sex, place of residence, caste, religion and household's assets and amenities were collected. Caste data were collected for Scheduled Castes (SC), Scheduled Tribes (ST), Other Backward Classes (OBC) and Others. Generally, the STs are considered to be socially and economically poorer, followed by SCs and OBCs. Many central and state government welfare schemes have been specifically designed for the welfare of the population. Similarly, data on religion were collected in seven groups. These are Hindu, Muslim, Christian, Sikh, Buddhist, Jain, Other religion and Religion not stated. We have combined Sikh, Buddhist, Jain, Other religion and Religion not stated groups owing to sample size constraints. The ASDR from SRS is used to compare the mortality rate across age groups.

### Methods:

The SRS data do not provide information on death by socio-economic status (SES). The advantages of using NFHS data is the use of its death statistics by socio-economic characteristics. In the NFHS-4, 0.6 per cent (479) of 74,945 deaths were found missing for one or more socio-economic status (SES). The missing information on SES for age at death were adjusted.

The following steps were used in adjusting missing cases, computing the Age-specific Death Rate (ASDR), life expectancy at birth, adult mortality ( ${}_{45}q_{15}$ ) and premature mortality ( ${}_{70}q_0$ ) by caste, religion and region.

1. Adjustment of Missing Death cases: The cases with missing information on SES for age at death were inflated by  $100/100-x$  for each age group [47].
2. A total of 479 cases was found missing for some basic variables like age, sex and other SES characteristics. We have distributed 479 cases equally in each age group.
3. Estimation of Age Specific Annual Death Rate (ASDR): The annual ASDR was estimated as the data were collected in three year reference period.
4. Estimation of life expectancy using abridged life table: Life expectancy at birth was computed using age-specific death and midyear population from the NFHS-4 life table approach. The 95% confidence interval of estimates are provided [57].
5. The abridged life table is constructed to estimate life expectancy at birth, adult mortality ( ${}_{45}q_{15}$ ) and premature mortality ( ${}_{70}q_0$ ) by caste, religion and region. Premature mortality is defined as any death under 70 years of age. The mathematical form of Premature mortality ( ${}_{70}q_0$ ) =  $1 - \frac{l_{70}}{l_0}$ ; and Mortality in working age ( ${}_{45}q_{15}$ ) =  $1 - \frac{l_{60}}{l_{15}}$  [58].

Finally, the age-specific death rate was used to compute life expectancy at birth by sex, caste, religion and region using the Chiang method. In the Chiang method the  ${}_{na_x}$  is estimated by the average number of years lived in the  $x$  to  $x + n$  age interval by those dying in the interval [58–60].

### Patient and public involvement

1  
2  
3 Patients and the public were not involved. The paper uses secondary data available for public  
4 use.  
5

## 6 7 **Results**

8  
9 **Figure 1** plots the age-specific death rate (ASDR) from SRS and NFHS in a five-year age  
10 group. The SRS estimates of life expectancy at birth in India was 68.3 years and that from  
11 NFHS-4 is 65.3 years. In general, the ASDRs is close from both the sources and the ASDRs  
12 overlap in a large number of age groups. **Table 1** presents the numerical value of ASDR from  
13 SRS and NFHS by a five-year age group. **Figure 2** presents the life expectancy at various  
14 ages. Results suggest that life-expectancy varies with different social characteristics; caste,  
15 religion and region in India.  
16  
17  
18

19  
20 **Figure 3** summarizes the estimated ASDR by caste in India. The ASDR was higher among  
21 SCs (0.055) followed by OBCs (0.050), STs (0.045) and then Others (0.043) at below age  
22 one. Similarly, at later ages, the curve shows a skewed pattern in each category. **Figure 4**  
23 presents the age-specific death rate by religion. The ASDR was higher among Muslims  
24 (0.051) than among Others (0.031) for age below one. Among population aged 50 years, the  
25 ASDR was higher for Hindus than for Christian. But at later ages, the ASDR was higher  
26 among Muslims followed by Hindus, Others and Christians in India.  
27  
28

29  
30 **Figure 5** shows that the ASDR for those below one year, was higher in the Eastern region  
31 (0.059) followed by the Central region (0.025). The death rate among children aged 1-9 years  
32 was higher in the Southern than in the Northern regions (0.009 vs. 0.003). The death rate was  
33 almost similar between age groups 10-34. The death rate for population in the age group 65-  
34 69 was higher in the Eastern region than in the Western region (0.036 versus 0.025). The  
35 variations were visible at age below one and in the 1-4 age group and showed a gap amongst  
36 the population of age-groups 60-85.  
37  
38

39  
40 The life expectancy at birth varies from four years across different caste groups in India  
41 (**Table 2**). The life expectancy at birth was estimated at 63.1 years [95% CI: 62.60-63.64] for  
42 Scheduled Castes, 64.0 years [95% CI: 63.25-64.88] for Scheduled Tribes, 65.1 years [95%  
43 CI: 64.69-65.42] for OBCs and 68.0 years [95% CI: 67.44-68.45] for Others (See Appendix  
44 Table 1). Females had a higher life expectancy at birth compared to males and this gap  
45 remains consistent across all the social groups. However, this gap decreases at the onset of  
46 elderly age (60 years) and ranges from 0.8 to 2.5 years across social groups. The life  
47 expectancy at age 60 was 17 years for SCs, 18.2 years for OBCs, 18.6 years for STs and 19.5  
48 years for Others. These findings are consistent with those of other studies [8,9]. Women had a  
49 higher life expectancy than men across different caste categories in India.  
50  
51  
52

53  
54 **Table 3** summarizes religious differentials in life expectancy. It suggests that the life  
55 expectancy at birth was higher among Others 68.6 years [95% CI: 67.38-69.80] compared to  
56 Christian 68.1 years [95% CI: 66.44-69.60] and Muslims 65.9 years [95% CI: 65.29-66.54]  
57 than India 65.0 years [95% CI: 64.74-65.22] (See Appendix Table 2). The gap in life  
58 expectancy between male and female was highest among Christians (8 years), followed by  
59 Others (6 years), Hindus (5 years) and Muslims (3 years). Female life expectancy at birth was  
60

1  
2  
3 highest among Christians (72.1 years) followed by Others (71.5 years) and Hindus (67.7  
4 years) but it was lowest among Muslims (67.6). The sex differential in life expectancy at age  
5 20 was higher among Christians followed by Hindus, Others and Muslims.  
6  
7

8 **Table 4** presents the life expectancy at birth by region in India, which ranges from 64–69  
9 years. With a difference of more than 5 years, the life expectancy was as low as 63.6 years  
10 [95% CI: 63.12-64.05] in the East region compared to 68.7 years [95% CI: 68.06-69.34] (See  
11 Appendix Table 3) in the North region. However, the life expectancy at age one was 68.7  
12 years in the Northern region and 63.8 years in the Northeast – a difference of 4.9 years.  
13 Similarly, among males, the life expectancy at birth ranged from 66.2 years [95% CI: 65.42-  
14 67.09] in the West to 60.9 years [95% CI: 59.16-62.58] (See Appendix Table 3) in the  
15 Northeast region – a difference of 5.3 years. At age one, the gap in life expectancy by sex was  
16 as high as 8 years in the South followed by the Northeast (5.5 years), North (5.4 years) and  
17 West (4.8 years). Below age one, the gap in life expectancy by sex was lower in the Eastern  
18 region. Similarly, life expectancy at birth for females was higher in the North region 71.8  
19 years [95% CI: 70.96-72.73] and lower in the Eastern region 64.8 years [95% CI: 64.15-  
20 65.45] (See Appendix Table 3), a difference of 7.0 years.  
21  
22  
23  
24  
25  
26

27 The probability of death for adults (15-59 years) and premature mortality (before at age 70)  
28 were estimated by sex, caste, region and religion. Results were presented in Table 5 and 6.  
29 **Table 5** shows that the level of adult mortality is higher among males than among females in  
30 India. Individuals belonging to STs have a higher probability of adult death (0.178) than SCs  
31 caste groups (0.165). Similarly, by religion, the probability of death among Hindus was 0.147  
32 compared to 0.145 among Others, followed by 0.133 among Christians and 0.129 among  
33 Muslims. By region, the probability of adult death in the North-eastern region was higher  
34 (0.167) than that in the Central regions (0.158). Similarly, premature mortality by caste group  
35 revealed that individuals belonging to SCs had a higher probability of premature mortality  
36 than General castes (0.382 versus 0.301). Premature mortality was also analyzed by religions  
37 and regions in India and was found to vary. For instance, Hindu (0.347) had a higher  
38 premature mortality than Muslim (0.341) and Christians (0.316). By region, the probability of  
39 premature mortality in the Northeast was 0.385 followed by Central 0.372, East 0.364,  
40 Southern 0.349, Western 0.303 and Northern regions 0.294. **Table 6** reveals that the adult  
41 mortality and premature mortality was higher among males than among females in each  
42 social strata; caste, religion, region in India. Premature mortality among males and females  
43 was high among STs (0.159) followed by SCs (0.127), OBCs (0.099) and Others (0.097).  
44 Similarly, for religion, premature mortality gap was higher among Christians than among  
45 Hindu. Regional variations shows that the gap was wider in the South than in other regions.  
46  
47  
48  
49  
50  
51  
52

53 Prior studies suggests that caste and religion differentials show inequality in mortality across  
54 populations, subgroups and geographic areas [44,60,61]. This study addresses social  
55 disparities in health and provides evidence for the gap in life expectancy and premature  
56 mortality across different social groups in India.  
57  
58

## 59 Discussion

1  
2  
3 Life expectancy at birth is widely used as a summary measure of health. Disaggregated  
4 estimates of life expectancy are limited in many developing countries including India. This is  
5 the first ever study that estimates life expectancy at birth and premature mortality by social  
6 groups such as caste, religion and region in India. The followings are salient findings of this  
7 study.  
8  
9

10 **First**, life expectancy at birth varies largely across caste, religion and region in India. Life  
11 expectancy at birth among SCs was lowest, followed by STs, OBCs and Others. **Second**, the  
12 caste and religion differentials in life expectancy were not only observed at birth but also  
13 across the ages. Life expectancy at birth was highest among Christians followed by Others,  
14 Muslims and Hindus. The gap in life expectancy at birth between Christians and Hindus was  
15 3 years. It was low in the Central region compared to the Western region at age below one  
16 year. **Third**, we found consistent sex differentials in life expectancy across caste and  
17 religious groups. Life expectancy at birth for women was higher for men across social groups  
18 in both rural and urban areas. **Fourth**, adult mortality ( $_{45}q_{15}$ ) was highest among SCs.  
19 However, in the case of religion, the probability of adult death ( $_{45}q_{15}$ ) was higher among  
20 Hindus than among Muslims. The probability of death was higher among Northeast than in  
21 the Western region in India. **Fifth**, premature mortality ( $_{70}q_0$ ) was highest among SCs. In the  
22 case of religion, premature deaths ( $_{0}q_{70}$ ) among Muslims was higher than among Christians.  
23 By region, premature mortality ( $_{70}q_0$ ) in the Northeast was higher than in the North.  
24  
25  
26  
27  
28  
29

30 We put forward the following explanations. Life expectancy has been explained by a  
31 combination of biological and behavioural factors [47]. The caste system, with its societal  
32 stratification and social restrictions, continues to have a major impact in India [62]. Caste and  
33 religion are inextricably linked to and is a proxy for socio-economic status in India. The poor  
34 socio-economic status (SES) is significantly associated with poor health outcomes and lower  
35 access to health-care facilities. The benefits of caste based employment, education and health  
36 schemes are largely availed by better off within the deprived caste group. As a result, the  
37 average remained low and poorer are getting poorer. Similarly, gender variations in health  
38 are persistent cutting across caste and religion. Though women are living longer than men,  
39 they have higher morbidity and disability at later ages [63]. The average year of disability  
40 free life expectancy among females was lower than among male. Adult mortality risks could  
41 be a result of chronic diseases or malnutrition in childhood. Most of the non-communicable  
42 diseases are non-curable but can be controlled with regular treatment. On the other hand,  
43 while the risk of being affected by these life-style conditions is relatively lower among the  
44 poor, once affected, they cannot afford the continued high treatment costs and so they  
45 experience premature death. The findings indicate significant differences in the population's  
46 health across different castes, religions and regions. Hindu children have higher mortality  
47 than Muslim children [64].  
48  
49  
50  
51  
52  
53

54 The study has some limitations too. Several studies indicates that socio-economic status and  
55 educational attainment significantly associated with adult deaths. The scope of further  
56 research is to examine the differential within caste group, say poor and rich within SCs and  
57 STs which is not captured in the study. We believe that the inequality within the caste group  
58 is high and contribute to mortality differentials and longevity. Second, the life expectancy in  
59 the paper is not comparable with the SRS due to non-use of adjustment factor used in  
60



estimation of CI. The CI and life expectancy was estimated without adjustment factor. Third, the paper provide result of probability of dying and life expectancy without adjusting for cause of death across the caste, religion and region.

The reduction of premature mortality, a major public health focus, is one of the UN Sustainable Development Goals [65]. The mortality rate has decreased for most age groups from 2000 to 2016, especially for adolescents and young adults in many developed and developing regions, but remains high among middle aged adults (ages 36-55) and older adults (55 years). However, premature mortality and adult mortality are still higher among all ethnic groups globally [66–68].

## Conclusion

The findings suggest that the mortality differentials are significant across caste, religion and region in India. Though, female life expectancy at birth is higher for females, they might be suffering from higher morbidity. Premature mortality is high across caste and religious groups. Prioritizing reduction of premature mortality, including infant and under-five mortality is recommended.

**Figure 1: Age-specific Death Rate from NFHS-4 and SRS, 2011-2015, in India**

**Figure 2: Estimated life expectancy at birth from NFHS-4, 2015-16 and SRS, 2011-15, in India**

**Figure 3: Age-specific death rate across caste groups in India, 2015-16**

**Figure 4: Age-specific death rate by religion in India, 2015-16**

**Figure 5: Age-specific death rate across regions in India, 2015-16**

**Table 1: ASDR by five-year age group and estimated life expectancy from NFHS 4 and SRS in India, 2015-16**

| Age Group | ASDR_NFHS | ASDR_SRS | Life Expectancy NFHS_2015 with CIs | Life Expectancy SRS_2015 |
|-----------|-----------|----------|------------------------------------|--------------------------|
| 0-1       | 0.0485    | 0.0429   | 65.3 (65.08-65.54)                 | 68.3                     |
| 1-5       | 0.0055    | 0.0022   | 67.5 (67.34-67.75)                 | 70.3                     |
| 5-10      | 0.0049    | 0.0008   | 65.0 (64.79-65.20)                 | 66.9                     |
| 10-15     | 0.0008    | 0.0007   | 61.5 (61.35-61.74)                 | 62.2                     |
| 15-20     | 0.0014    | 0.0011   | 56.8 (56.59-56.94)                 | 57.4                     |
| 20-25     | 0.0018    | 0.0015   | 52.2 (51.98-52.34)                 | 52.7                     |
| 25-30     | 0.0021    | 0.0017   | 47.6 (47.44-47.79)                 | 48.1                     |
| 30-35     | 0.0036    | 0.0020   | 43.1 (42.93-43.28)                 | 43.5                     |
| 35-40     | 0.0032    | 0.0027   | 38.8 (38.68-39.01)                 | 38.9                     |
| 40-45     | 0.0045    | 0.0038   | 34.4 (34.24-34.57)                 | 34.4                     |
| 45-50     | 0.0060    | 0.0054   | 30.1 (29.98-30.31)                 | 30.0                     |

|              |        |        |                    |      |
|--------------|--------|--------|--------------------|------|
| <b>50-55</b> | 0.0083 | 0.0086 | 26.0 (25.83-26.15) | 25.7 |
| <b>55-60</b> | 0.0147 | 0.0127 | 22.0 (21.84-22.15) | 21.7 |
| <b>60-65</b> | 0.0188 | 0.0196 | 18.5 (18.32-18.63) | 18.0 |
| <b>65-70</b> | 0.0311 | 0.0303 | 15.1 (14.91-15.20) | 14.6 |
| <b>70-75</b> | 0.0418 | 0.0465 | 12.2 (12.04-12.32) | 11.5 |
| <b>75-80</b> | 0.0821 | 0.0700 | 9.4 (9.29-9.58)    | 8.9  |
| <b>80-85</b> | 0.0856 | 0.1142 | 8.0 (7.89-8.13)    | 6.6  |
| <b>85+</b>   | 0.1664 | 0.2058 | 6.0 (6.01-6.01)    | 4.9  |

For peer review only

**Table: 2. Life expectancy by caste and sex in India, 2015-16**

| Age Interval   | SC    |       |        | ST    |       |        | OBC   |       |        | Others |       |        |
|----------------|-------|-------|--------|-------|-------|--------|-------|-------|--------|--------|-------|--------|
|                | Total | Male  | Female | Total | Male  | Female | Total | Male  | Female | Total  | Male  | Female |
| <b>Below 1</b> | 63.13 | 60.32 | 66.31  | 64.02 | 60.53 | 67.89  | 65.06 | 62.88 | 67.47  | 67.94  | 66.09 | 69.95  |
| <b>1</b>       | 65.65 | 63.13 | 68.48  | 65.96 | 62.90 | 69.34  | 67.35 | 65.25 | 69.64  | 69.89  | 68.11 | 71.81  |
| <b>5</b>       | 63.12 | 60.59 | 65.95  | 63.84 | 60.98 | 67.01  | 64.82 | 62.81 | 67.00  | 67.07  | 65.26 | 69.01  |
| <b>10</b>      | 59.70 | 57.18 | 62.52  | 60.04 | 57.18 | 63.19  | 61.43 | 59.41 | 63.62  | 63.59  | 61.89 | 65.41  |
| <b>15</b>      | 54.96 | 52.43 | 57.78  | 55.35 | 52.52 | 58.47  | 56.65 | 54.62 | 58.87  | 58.77  | 57.06 | 60.58  |
| <b>20</b>      | 50.39 | 47.90 | 53.17  | 50.83 | 47.98 | 53.98  | 52.03 | 49.98 | 54.26  | 54.10  | 52.37 | 55.96  |
| <b>25</b>      | 45.87 | 43.42 | 48.61  | 46.44 | 43.58 | 49.60  | 47.48 | 45.46 | 49.69  | 49.53  | 47.77 | 51.41  |
| <b>30</b>      | 41.45 | 39.08 | 44.11  | 42.06 | 39.29 | 45.14  | 42.96 | 41.02 | 45.07  | 44.92  | 43.25 | 46.71  |
| <b>35</b>      | 37.25 | 35.02 | 39.75  | 37.96 | 35.38 | 40.80  | 38.70 | 36.90 | 40.68  | 40.48  | 38.98 | 42.10  |
| <b>40</b>      | 32.87 | 30.83 | 35.17  | 33.72 | 31.36 | 36.30  | 34.27 | 32.64 | 36.07  | 35.96  | 34.62 | 37.40  |
| <b>45</b>      | 28.76 | 26.98 | 30.77  | 29.65 | 27.42 | 32.08  | 29.97 | 28.53 | 31.55  | 31.55  | 30.36 | 32.82  |
| <b>50</b>      | 24.66 | 23.04 | 26.47  | 25.69 | 23.75 | 27.77  | 25.78 | 24.56 | 27.13  | 27.31  | 26.30 | 28.39  |
| <b>55</b>      | 20.76 | 19.45 | 22.26  | 21.88 | 20.30 | 23.63  | 21.74 | 20.72 | 22.91  | 23.30  | 22.73 | 23.97  |
| <b>60</b>      | 17.39 | 16.27 | 18.69  | 18.62 | 17.44 | 19.93  | 18.24 | 17.44 | 19.15  | 19.51  | 19.16 | 19.96  |
| <b>65</b>      | 14.09 | 13.20 | 15.10  | 15.29 | 14.44 | 16.21  | 14.79 | 14.14 | 15.53  | 16.01  | 15.82 | 16.29  |
| <b>70</b>      | 11.37 | 10.72 | 12.12  | 12.47 | 11.69 | 13.28  | 11.95 | 11.44 | 12.52  | 12.93  | 12.87 | 13.08  |
| <b>75</b>      | 8.55  | 8.00  | 9.15   | 9.63  | 9.04  | 10.19  | 9.22  | 8.85  | 9.61   | 10.27  | 10.34 | 10.28  |
| <b>80</b>      | 7.22  | 6.66  | 7.78   | 8.70  | 8.28  | 9.09   | 7.95  | 7.51  | 8.39   | 8.44   | 8.66  | 8.34   |
| <b>85+</b>     | 4.97  | 4.47  | 5.43   | 6.35  | 6.32  | 6.38   | 5.82  | 5.46  | 6.15   | 6.95   | 7.97  | 6.28   |

**Table 3. Life Expectancy by religion and sex in India, 2015-16**

| Age Interval   | Hindu |       |        | Muslim |       |        | Christian |       |        | Others |       |        |
|----------------|-------|-------|--------|--------|-------|--------|-----------|-------|--------|--------|-------|--------|
|                | Total | Male  | Female | Total  | Male  | Female | Total     | Male  | Female | Total  | Male  | Female |
| <b>Below 1</b> | 64.98 | 62.51 | 67.71  | 65.89  | 64.39 | 67.55  | 68.07     | 64.33 | 72.06  | 68.59  | 65.89 | 71.53  |
| <b>1</b>       | 67.22 | 64.94 | 69.71  | 68.32  | 66.84 | 69.92  | 69.41     | 65.80 | 73.24  | 69.74  | 67.39 | 72.28  |
| <b>5</b>       | 64.74 | 62.54 | 67.14  | 65.54  | 63.92 | 67.29  | 67.19     | 64.11 | 70.40  | 66.60  | 64.46 | 68.91  |
| <b>10</b>      | 61.39 | 59.19 | 63.78  | 61.61  | 60.03 | 63.33  | 64.40     | 61.88 | 66.96  | 62.53  | 60.30 | 64.94  |
| <b>15</b>      | 56.63 | 54.42 | 59.03  | 56.82  | 55.20 | 58.58  | 59.60     | 57.18 | 62.05  | 57.64  | 55.41 | 60.05  |
| <b>20</b>      | 52.03 | 49.81 | 54.45  | 52.15  | 50.59 | 53.84  | 54.97     | 52.50 | 57.48  | 52.91  | 50.75 | 55.22  |
| <b>25</b>      | 47.51 | 45.30 | 49.91  | 47.60  | 46.03 | 49.30  | 50.26     | 47.74 | 52.83  | 48.27  | 46.23 | 50.44  |
| <b>30</b>      | 43.01 | 40.90 | 45.32  | 42.96  | 41.45 | 44.62  | 45.66     | 43.28 | 48.09  | 43.77  | 41.74 | 45.94  |
| <b>35</b>      | 38.77 | 36.83 | 40.89  | 38.51  | 37.07 | 40.09  | 41.45     | 39.10 | 43.83  | 39.44  | 37.72 | 41.25  |
| <b>40</b>      | 34.35 | 32.59 | 36.28  | 34.01  | 32.66 | 35.50  | 37.02     | 34.94 | 39.14  | 35.33  | 33.58 | 37.16  |
| <b>45</b>      | 30.10 | 28.55 | 31.79  | 29.55  | 28.26 | 30.98  | 32.91     | 31.19 | 34.64  | 31.22  | 29.79 | 32.71  |
| <b>50</b>      | 25.95 | 24.60 | 27.42  | 25.32  | 24.18 | 26.58  | 28.90     | 27.47 | 30.35  | 27.11  | 25.81 | 28.44  |
| <b>55</b>      | 21.97 | 20.93 | 23.14  | 21.31  | 20.33 | 22.42  | 24.75     | 23.85 | 25.72  | 23.04  | 22.05 | 24.10  |
| <b>60</b>      | 18.45 | 17.64 | 19.36  | 17.87  | 17.08 | 18.77  | 21.02     | 20.11 | 21.98  | 19.54  | 18.93 | 20.20  |
| <b>65</b>      | 14.99 | 14.37 | 15.70  | 14.66  | 14.16 | 15.22  | 17.68     | 17.20 | 18.18  | 15.99  | 15.35 | 16.69  |
| <b>70</b>      | 12.10 | 11.60 | 12.66  | 12.09  | 11.79 | 12.43  | 14.08     | 13.81 | 14.39  | 12.89  | 12.48 | 13.33  |
| <b>75</b>      | 9.37  | 8.97  | 9.80   | 9.36   | 9.49  | 9.23   | 11.44     | 11.40 | 11.49  | 9.74   | 9.19  | 10.33  |
| <b>80</b>      | 7.97  | 7.61  | 8.34   | 8.01   | 7.97  | 8.07   | 9.16      | 9.41  | 8.92   | 8.24   | 7.77  | 8.71   |
| <b>85+</b>     | 5.97  | 5.85  | 6.09   | 5.86   | 5.86  | 5.89   | 7.91      | 7.89  | 7.96   | 6.32   | 6.68  | 6.06   |

Table: 4. Life expectancy across regions and sex in India, 2015-16

| Age Interval | Northeast |       |        | East  |       |        | North |       |        | Central |       |        | West  |       |        | South |       |        |
|--------------|-----------|-------|--------|-------|-------|--------|-------|-------|--------|---------|-------|--------|-------|-------|--------|-------|-------|--------|
|              | Total     | Male  | Female | Total | Male  | Female | Total | Male  | Female | Total   | Male  | Female | Total | Male  | Female | Total | Male  | Female |
| Below 1      | 63.77     | 60.88 | 67.09  | 63.57 | 62.39 | 64.79  | 68.68 | 65.97 | 71.82  | 63.76   | 61.80 | 65.94  | 68.64 | 66.19 | 71.35  | 64.87 | 60.97 | 69.22  |
| 1            | 66.11     | 63.56 | 69.04  | 66.37 | 65.22 | 67.56  | 70.24 | 67.75 | 73.11  | 66.55   | 64.76 | 68.52  | 69.58 | 67.28 | 72.11  | 66.69 | 63.14 | 70.59  |
| 5            | 64.07     | 61.63 | 66.86  | 63.59 | 62.44 | 64.77  | 67.15 | 64.75 | 69.89  | 63.95   | 62.02 | 66.08  | 66.78 | 64.48 | 69.30  | 65.04 | 61.87 | 68.46  |
| 10           | 60.26     | 57.79 | 63.11  | 60.19 | 59.01 | 61.40  | 63.12 | 60.74 | 65.83  | 60.11   | 58.25 | 62.17  | 62.93 | 60.39 | 65.72  | 62.90 | 59.94 | 66.08  |
| 15           | 55.53     | 53.07 | 58.34  | 55.46 | 54.24 | 56.70  | 58.30 | 55.91 | 61.03  | 55.38   | 53.51 | 57.45  | 58.07 | 55.52 | 60.88  | 58.09 | 55.16 | 61.22  |
| 20           | 51.01     | 48.55 | 53.82  | 50.87 | 49.65 | 52.11  | 53.63 | 51.24 | 56.35  | 50.85   | 48.99 | 52.89  | 53.41 | 50.80 | 56.29  | 53.41 | 50.50 | 56.50  |
| 25           | 46.42     | 44.04 | 49.17  | 46.34 | 45.13 | 47.57  | 49.00 | 46.62 | 51.70  | 46.41   | 44.56 | 48.45  | 48.84 | 46.19 | 51.77  | 48.82 | 45.99 | 51.84  |
| 30           | 41.95     | 39.65 | 44.61  | 41.77 | 40.61 | 42.96  | 44.37 | 42.07 | 46.99  | 42.00   | 40.24 | 43.95  | 44.25 | 41.66 | 47.12  | 44.35 | 41.66 | 47.23  |
| 35           | 37.70     | 35.59 | 40.14  | 37.59 | 36.54 | 38.68  | 39.99 | 37.85 | 42.43  | 37.77   | 36.17 | 39.57  | 39.87 | 37.42 | 42.54  | 40.10 | 37.66 | 42.71  |
| 40           | 33.38     | 31.37 | 35.71  | 33.16 | 32.32 | 34.04  | 35.54 | 33.53 | 37.82  | 33.32   | 31.81 | 35.02  | 35.38 | 33.07 | 37.90  | 35.76 | 33.56 | 38.12  |
| 45           | 29.19     | 27.38 | 31.29  | 28.92 | 28.27 | 29.62  | 31.18 | 29.33 | 33.28  | 29.08   | 27.71 | 30.63  | 31.11 | 29.07 | 33.32  | 31.49 | 29.53 | 33.57  |
| 50           | 25.29     | 23.80 | 27.03  | 24.72 | 24.18 | 25.30  | 27.07 | 25.39 | 28.97  | 24.90   | 23.67 | 26.28  | 26.98 | 25.18 | 28.87  | 27.34 | 25.64 | 29.15  |
| 55           | 21.44     | 20.30 | 22.84  | 20.78 | 20.42 | 21.18  | 23.03 | 21.66 | 24.63  | 21.01   | 19.98 | 22.19  | 22.85 | 21.53 | 24.29  | 23.29 | 21.96 | 24.76  |
| 60           | 17.91     | 16.96 | 19.06  | 17.32 | 17.10 | 17.60  | 19.37 | 18.36 | 20.59  | 17.52   | 16.68 | 18.49  | 19.27 | 18.30 | 20.29  | 19.83 | 18.72 | 21.04  |
| 65           | 14.93     | 14.21 | 15.77  | 13.86 | 13.72 | 14.02  | 15.74 | 14.85 | 16.80  | 14.31   | 13.69 | 15.04  | 15.84 | 15.09 | 16.62  | 16.34 | 15.54 | 17.21  |
| 70           | 12.22     | 11.92 | 12.57  | 11.13 | 11.00 | 11.30  | 12.85 | 12.08 | 13.76  | 11.66   | 11.11 | 12.28  | 12.61 | 12.02 | 13.21  | 13.39 | 12.88 | 13.93  |
| 75           | 9.64      | 9.31  | 10.01  | 8.38  | 8.24  | 8.55   | 9.72  | 9.03  | 10.51  | 8.91    | 8.46  | 9.41   | 9.90  | 9.62  | 10.17  | 10.88 | 10.62 | 11.13  |
| 80           | 7.99      | 7.77  | 8.23   | 7.16  | 7.20  | 7.15   | 8.11  | 7.32  | 8.96   | 7.76    | 7.44  | 8.08   | 8.27  | 7.89  | 8.62   | 9.36  | 9.03  | 9.66   |
| 85+          | 6.01      | 5.74  | 6.29   | 4.94  | 5.18  | 4.74   | 6.28  | 5.63  | 6.95   | 5.67    | 5.67  | 5.68   | 6.49  | 6.70  | 6.38   | 7.55  | 7.35  | 7.72   |

**Table 5. Probability of death at age 15-60 and premature mortality at age 70 by caste, religion and region in India**

| Probability of dying between n to x+n Interval |                  |                |                   |                |             |              |
|------------------------------------------------|------------------|----------------|-------------------|----------------|-------------|--------------|
| <b>Caste</b>                                   | <b>SC</b>        | <b>ST</b>      | <b>OBC</b>        | <b>Others</b>  |             |              |
| ${}_{45}q_{15}$                                | 0.1651           | 0.1783         | 0.1407            | 0.1223         |             |              |
| ${}_{70}q_0$                                   | 0.3823           | 0.3811         | 0.3443            | 0.3006         |             |              |
| <b>Religion</b>                                | <b>Hindus</b>    | <b>Muslims</b> | <b>Christians</b> | <b>Others</b>  |             |              |
| ${}_{45}q_{15}$                                | 0.1466           | 0.1286         | 0.1326            | 0.1453         |             |              |
| ${}_{70}q_0$                                   | 0.3473           | 0.3412         | 0.3164            | 0.3089         |             |              |
| <b>Region</b>                                  | <b>Northeast</b> | <b>East</b>    | <b>North</b>      | <b>Central</b> | <b>West</b> | <b>South</b> |
| ${}_{45}q_{15}$                                | 0.1671           | 0.1520         | 0.1291            | 0.1575         | 0.1292      | 0.1380       |
| ${}_{70}q_0$                                   | 0.3851           | 0.3636         | 0.2935            | 0.3724         | 0.3029      | 0.3493       |

**Table 6. Probability of death at age 15-60 and premature mortality at age 70 among different categories of caste, religion and region by sex in India**

| Probability of dying between n to x+n Interval | SC               |               | ST             |               | OBC               |               | Others         |               |             |               |              |               |
|------------------------------------------------|------------------|---------------|----------------|---------------|-------------------|---------------|----------------|---------------|-------------|---------------|--------------|---------------|
| <b>Caste</b>                                   | <b>Male</b>      | <b>Female</b> | <b>Male</b>    | <b>Female</b> | <b>Male</b>       | <b>Female</b> | <b>Male</b>    | <b>Female</b> |             |               |              |               |
| ${}_{45}q_{15}$                                | 0.2097           | 0.1201        | 0.2263         | 0.1307        | 0.1754            | 0.1064        | 0.1593         | 0.0861        |             |               |              |               |
| ${}_{70}q_0$                                   | 0.4430           | 0.3157        | 0.4567         | 0.2979        | 0.3923            | 0.2929        | 0.3478         | 0.2512        |             |               |              |               |
| <b>Religion</b>                                | <b>Hindus</b>    |               | <b>Muslims</b> |               | <b>Christians</b> |               | <b>Others</b>  |               |             |               |              |               |
| ${}_{45}q_{15}$                                | 0.1866           | 0.1067        | 0.1523         | 0.1059        | 0.1815            | 0.0869        | 0.1842         | 0.1065        |             |               |              |               |
| ${}_{70}q_0$                                   | 0.4018           | 0.2886        | 0.3828         | 0.2967        | 0.3888            | 0.2394        | 0.3606         | 0.2542        |             |               |              |               |
| Probability of dying between n to x+n Interval | <b>Northeast</b> |               | <b>East</b>    |               | <b>North</b>      |               | <b>Central</b> |               | <b>West</b> |               | <b>South</b> |               |
| <b>Regions</b>                                 | <b>Male</b>      | <b>Female</b> | <b>Male</b>    | <b>Female</b> | <b>Male</b>       | <b>Female</b> | <b>Male</b>    | <b>Female</b> | <b>Male</b> | <b>Female</b> | <b>Male</b>  | <b>Female</b> |
| ${}_{45}q_{15}$                                | 0.2142           | 0.1197        | 0.1795         | 0.1253        | 0.1655            | 0.0925        | 0.1879         | 0.1271        | 0.1753      | 0.0830        | 0.1884       | 0.0891        |
| ${}_{70}q_0$                                   | 0.4464           | 0.3144        | 0.3945         | 0.3318        | 0.3500            | 0.2321        | 0.4179         | 0.3233        | 0.3655      | 0.2353        | 0.4234       | 0.2683        |

## DECLARATION FOR DOUBLE BLIND

### Availability of Data and Material

Data are available in a public, open access repository

(<https://dhsprogram.com/what-we-do/survey/survey-display-355.cfm>), and

[http://www.censusindia.gov.in/vital\\_statistics/Appendix\\_SRS\\_Based\\_Life\\_Table.html](http://www.censusindia.gov.in/vital_statistics/Appendix_SRS_Based_Life_Table.html)

**Funding:** The authors have not declared a specific grant for this research from any funding agency in the public, commercial or not-for-profit sectors.

### Contributors:

Conception and design of the study: Meena Kumari and Sanjay Kumar Mohanty, Analysis and/or interpretation of data: Meena Kumari and Sanjay Kumar Mohanty; drafting the manuscript: Meena Kumari and Sanjay Kumar Mohanty; revising the manuscript critically for important content: Sanjay Kumar Mohanty.

**Competing Interests:** None declared.

**Provenance and peer review:** Not commissioned; externally peer reviewed.

**Acknowledgements:** Authors thank editor and reviewers for their useful suggestions in revising the earlier draft. Authors also thank Mr. Suyash Mishra for his useful comments and suggestions.

## References

- 1 WHO. World Health Statistics 2016 Monitoring health For The SDGs. Geneva: 2016.
- 2 Gerry CJ, Raskina Y, Tsyplakova D. Convergence or Divergence? Life Expectancy Patterns in Post-communist Countries, 1959-2010. *Soc Indic Res* 2018;**140**:309–32. doi:10.1007/s11205-017-1764-4
- 3 Joe W, Liou L, Subramanian S V. Increasing global heterogeneity in the life expectancy of older populations. *bioRxiv* 2019;:589630. doi:10.1101/589630
- 4 Wilson C. Understanding Global Demographic Convergence since 1950. *Popul Dev Rev* 2011;**37**:375–88. doi:10.1111/j.1728-4457.2011.00415.x
- 5 McMichael AJ, McKee M, Shkolnikov V, *et al.* Mortality trends and setbacks: global convergence or divergence? *Lancet* 2004;**363**:1155–9. doi:<https://doi.org/10.1016/S0140->

- 6736(04)15902-3
- 6 Moser K, Shkolnikov VM, Leon DA. World Mortality 1950–2000: Divergence Replaces Convergence from the Late 1980s BT - HIV, Resurgent Infections and Population Change in Africa. In: Caraël M, Glynn JR, eds. . Dordrecht: : Springer Netherlands 2007. 11–25. doi:10.1007/978-1-4020-6174-5\_1
  - 7 Wang H, Naghavi M, Allen C, *et al*. Global, regional, and national life expectancy, all-cause mortality, and cause-specific mortality for 249 causes of death, 1980–2015: a systematic analysis for the Global Burden of Disease Study 2015. *Lancet* 2016;**388**:1459–544. doi:[https://doi.org/10.1016/S0140-6736\(16\)31012-1](https://doi.org/10.1016/S0140-6736(16)31012-1)
  - 8 Division UND of IE and SAP. Sex differentials in survivorship in the developing world: levels, regional patterns and demographic determinants. *Popul Bull UN* 1988;:51.
  - 9 Gleit DA, Horiuchi S. The Narrowing Sex Differential in Life Expectancy in High-Income Populations: Effects of Differences in the Age Pattern of Mortality. *Popul Stud (NY)* 2007;**61**:141–59.<http://www.jstor.org/stable/27643410>
  - 10 Zanfongnon R, Bourbeau R. Sex Differential in Life Expectancy at Birth in Canada, 1921-2004: Provincial Variations. 2008.
  - 11 Dubey M, Ram U, Ram F. Threshold Levels of Infant and Under-Five Mortality for Crossover between Life Expectancies at Ages Zero, One and Five in India: A Decomposition Analysis. *PLoS One* 2015;**10**:e0143764.<https://doi.org/10.1371/journal.pone.0143764>
  - 12 Singh A, Ladusingh L. Life expectancy at birth and life disparity: an assessment of sex differentials in mortality in India. *Int J Popul Stud* 2016;**2**. doi:10.18063/IJPS.2016.01.005
  - 13 Dicker D, Nguyen G, Abate D, *et al*. Global, regional, and national age-sex-specific mortality and life expectancy, 1950-2017: a systematic analysis for the Global Burden of Disease Study 2017. *Lancet* 2018;**392**:1684–735. doi:10.1016/S0140-6736(18)31891-9
  - 14 Bassett MT, Krieger N. Social class and black-white differences in breast cancer survival. *Am J Public Health* 1986;**76**:1400–3. doi:10.2105/ajph.76.12.1400
  - 15 Keil JE, Sutherland SE, Knapp RG, *et al*. Does equal socioeconomic status in black and white men mean equal risk of mortality? *Am J Public Health* 1992;**82**:1133–6. doi:10.2105/ajph.82.8.1133
  - 16 Hummer RA, Rogers RG, Eberstein IW. Sociodemographic Differentials in Adult Mortality: A Review of Analytic Approaches. *Popul Dev Rev* 1998;**24**:553–78. doi:10.2307/2808154
  - 17 Wagstaff A. Socioeconomic inequalities in child mortality: comparisons across nine developing countries. *Bull World Health Organ* 2000;**78**:19–29.
  - 18 Dowd K, Blake D, Cairns AJG. Facing up to uncertain life expectancy: The longevity fan charts. *Demography* 2010;**47**:67–78. doi:10.1353/dem.0.0083
  - 19 Singh A, Pathak PK, Chauhan RK, *et al*. Infant and Child Mortality in India in the Last Two Decades: A Geospatial Analysis. *PLoS One* 2011;**6**:e26856.<https://doi.org/10.1371/journal.pone.0026856>
  - 20 Eggleston KN, Fuchs VR. The New Demographic Transition: Most Gains in Life Expectancy Now Realized Late in Life. *J Econ Perspect* 2012;**26**:137–56. doi:10.1257/jep.26.3.137



- 1  
2  
3 21 Fenelon A. Geographic Divergence in Mortality in the United States. *Popul Dev Rev* 2013;**39**:611–34. doi:10.1111/j.1728-4457.2013.00630.x
- 4  
5  
6 22 Gordon E-S, Haklai Z, Meron J, *et al.* Regional variations in mortality and causes of death in  
7 Israel, 2009-2013. *Isr J Health Policy Res* 2017;**6**:39. doi:10.1186/s13584-017-0164-1
- 8  
9 23 Liu L, Chu Y, Oza S, *et al.* National, regional, and state-level all-cause and cause-specific  
10 under-5 mortality in India in 2000–15: a systematic analysis with implications for the  
11 Sustainable Development Goals. *Lancet Glob Heal* 2019;**7**:e721–34. doi:10.1016/S2214-  
12 109X(19)30080-4
- 13  
14 24 Montgomery AL, Ram U, Kumar R, *et al.* Maternal mortality in India: causes and healthcare  
15 service use based on a nationally representative survey. *PLoS One* 2014;**9**:e83331–e83331.  
16 doi:10.1371/journal.pone.0083331
- 17  
18 25 Knudson A, Meit M, Tanenbaum E, *et al.* Exploring rural and urban mortality differences.  
19 *Bethseda Rural Heal Reform Policy Res Cent* 2015.
- 20  
21 26 Saikia N. Trends in Mortality Differentials in India. 2016. 55–71. doi:10.1007/978-3-319-  
22 24783-0\_3
- 23  
24 27 Chakraborti B. Rural-urban mortality differential in Indian states: effect of environmental  
25 inequality and associated factors. *Rural Demogr* 1982;**9**:1–6.
- 26  
27 28 Hartley D. Rural health disparities, population health, and rural culture. *Am J Public Health*  
28 2004;**94**:1675–8. doi:10.2105/ajph.94.10.1675
- 29  
30 29 Singh GK, Siahpush M. Widening Rural–Urban Disparities in Life Expectancy, U.S., 1969–  
31 2009. *Am J Prev Med* 2014;**46**:e19–29. doi:https://doi.org/10.1016/j.amepre.2013.10.017
- 32  
33 30 Shah VR, Christian DS, Prajapati AC, *et al.* Quality of life among elderly population residing  
34 in urban field practice area of a tertiary care institute of Ahmedabad city, Gujarat. *J Fam Med*  
35 *Prim care* 2017;**6**:101–5. doi:10.4103/2249-4863.214965
- 36  
37 31 Krishnaji N, James KS. Gender differentials in adult mortality: with notes on rural-urban  
38 contrasts. *Econ Polit Wkly* 2002;**37**:4633–7.
- 39  
40 32 Saikia N, Jasilionis D, Ram F, *et al.* Trends in geographical mortality differentials in India.  
41 *Rostock Max Planck Inst Demogr Res* 2009.
- 42  
43 33 Ram U, Jha P, Gerland P, *et al.* Age-specific and sex-specific adult mortality risk in India in  
44 2014: analysis of 0· 27 million nationally surveyed deaths and demographic estimates from  
45 597 districts. *Lancet Glob Heal* 2015;**3**:e767–75.
- 46  
47 34 Kannan KP, Thankappan KR, Ramankutty V, *et al.* Kerala: a unique model of development.  
48 *Health Millions* 1991;**17**:30–3.
- 49  
50 35 Pal P, Ghosh J. Inequality in India: A survey of recent trends. 2007.
- 51  
52 36 Sen A. Development as freedom (1999). *Roberts, JT, Hite, AB Chorev, N Glob Dev Read*  
53 *Perspect Dev Glob Chang* 2014;**2**:525–47.
- 54  
55 37 Wang H, Abajobir AA, Abate KH, *et al.* Global, regional, and national under-5 mortality,  
56 adult mortality, age-specific mortality, and life expectancy, 1970-2016: a systematic analysis  
57 for the Global Burden of Disease Study 2016. *Lancet* 2017;**390**:1084–150. doi:10.1016/S0140-  
58  
59  
60

- 6736(17)31833-0
- 38 Mohindra KS, Haddad S, Narayana D. Women's health in a rural community in Kerala, India: do caste and socioeconomic position matter? *J Epidemiol Community Health* 2006;**60**:1020 LP – 1026. doi:10.1136/jech.2006.047647
- 39 Subramanian S V, Ackerson LK, Subramanyam MA, *et al.* Health Inequalities in India: The Axes of Stratification. *Brown J World Aff* 2008;**14**:127–38. <http://www.jstor.org/stable/24590719>
- 40 Vart P, Jaglan A, Shafique K. Caste-based social inequalities and childhood anemia in India: results from the National Family Health Survey (NFHS) 2005–2006. *BMC Public Health* 2015;**15**:537. doi:10.1186/s12889-015-1881-4
- 41 Mackenbach JP, Kunst AE. Measuring the magnitude of socio-economic inequalities in health: An overview of available measures illustrated with two examples from Europe. *Soc Sci Med* 1997;**44**:757–71. doi:[https://doi.org/10.1016/S0277-9536\(96\)00073-1](https://doi.org/10.1016/S0277-9536(96)00073-1)
- 42 Kakwani N, Wagstaff A, Van Doorslaer E. Socioeconomic inequalities in health: measurement, computation, and statistical inference. *J Econom* 1997;**77**:87–103.
- 43 Burström K, Johannesson M, Diderichsen F. Increasing socio-economic inequalities in life expectancy and QALYs in Sweden 1980–1997. *Health Econ* 2005;**14**:831–50. doi:10.1002/hec.977
- 44 Subramanian S V, Smith GD, Subramanyam M. Indigenous Health and Socioeconomic Status in India. *PLOS Med* 2006;**3**:e421. <https://doi.org/10.1371/journal.pmed.0030421>
- 45 Lorant V, Croux C, Weich S, *et al.* Depression and socio-economic risk factors: 7-year longitudinal population study. *Br J Psychiatry* 2007;**190**:293–8. doi:DOI: 10.1192/bjp.bp.105.020040
- 46 Malhotra C, Do YK. Socio-economic disparities in health system responsiveness in India. *Health Policy Plan* 2013;**28**:197–205. doi:10.1093/heapol/czs051
- 47 Asaria M, Mazumdar S, Chowdhury S, *et al.* Socioeconomic inequality in life expectancy in India. *BMJ Glob Heal* 2019;**4**:e001445.
- 48 Mohanty SK, Ram F. Life Expectancy At Birth Among Social and Economic Groups in India. IIPS Res. Br. 2010. [http://ipsindia.org/pdf/RB-13 file for uploading.pdf](http://ipsindia.org/pdf/RB-13_file_for_uploading.pdf) (accessed 1 Nov 2016).
- 49 Coffey D, Deshpande A, Hammer J, *et al.* Local Social Inequality, Economic Inequality, and Disparities in Child Height in India. *Demography* 2019;**56**:1427–52. doi:10.1007/s13524-019-00794-2
- 50 LoPalo M, Coffey D, Spears D. The Consequences of Social Inequality for the Health and Development of India's Children: The Case of Caste, Sanitation, and Child Height. *Soc Justice Res* 2019;**32**:239–54. doi:10.1007/s11211-019-00323-x
- 51 Patel P, Das M, Das U. The perceptions, health-seeking behaviours and access of Scheduled Caste women to maternal health services in Bihar, India. *Reprod Health Matters* 2018;**26**:114–25.
- 52 Acharya SS. Health Equity in India: An Examination Through the Lens of Social Exclusion. *J*

- 1  
2  
3 *Soc Incl Stud* 2018;**4**:104–30. doi:10.1177/2394481118774489  
4  
5 53 Khubchandani J, Soni A, Fahey N, *et al.* Caste matters: perceived discrimination among  
6 women in rural India. *Arch Womens Ment Health* 2018;**21**:163–70.  
7  
8 54 George S. *Caste and Care: Is Indian Healthcare Delivery System Favourable for Dalits?*  
9 Institute for Social and Economic Change 2015.  
10  
11 55 Malhotra R, Rajan I, Syam S, *et al.* SOCIAL GROUP DISPARITIES IN LIFE  
12 EXPECTANCY AND ACTIVE LIFE EXPECTANCY AMONG OLDER PERSONS IN  
13 KERALA, INDIA. *Innov Aging* 2018;**2**:230. doi:10.1093/geroni/igy023.855  
14  
15 56 Guillot M, Gavrilova N, Torgasheva L, *et al.* Divergent paths for adult mortality in Russia and  
16 Central Asia: evidence from Kyrgyzstan. *PLoS One* 2013;**8**:e75314.  
17  
18 57 Andreev EM, Shkolnikov VM. Spreadsheet for calculation of confidence limits for any life  
19 table or healthy-life table quantity. *Rostock: Max Planck Inst Demographic Research*  
20 *(MPIDR) Technical Report-* 2010;5.  
21  
22 58 Preston Samuel H, Patrick H, Michel G. *Demography: measuring and modeling population*  
23 *processes. MA Blackwell Publ* 2001.  
24  
25 59 Chiang CL. On Constructing Current Life Tables. *J Am Stat Assoc* 1972;**67**:538–41.  
26 doi:10.1080/01621459.1972.10481245  
27  
28 60 Schoen R. Calculating Life Tables by Estimating Chiang's a From Observed Rates.  
29 *Demography* 1978;**15**:625–35. doi:10.2307/2061212  
30  
31 61 Subramanian S V, Nandy S, Irving M, *et al.* The Mortality Divide in India: The Differential  
32 Contributions of Gender, Caste, and Standard of Living Across the Life Course. *Am J Public*  
33 *Health* 2006;**96**:818–25. doi:10.2105/AJPH.2004.060103  
34  
35 62 Borooah VK, Dubey A, Iyer S. The Effectiveness of Jobs Reservation: Caste, Religion and  
36 Economic Status in India. *Dev Change* 2007;**38**:423–45. doi:10.1111/j.1467-  
37 7660.2007.00418.x  
38  
39 63 Vijayanath V, Anitha MR, Vijayamahantesh SN, *et al.* Caste and health in Indian Scenario. *J*  
40 *Punjab Acad Forensic Med Toxicol* 2010;**10**:42–4.  
41  
42 64 Saikia N, Bora JK. Does Increasing Longevity Lead Increasing Disability? Evidence from  
43 Indian States. *Soc Chang Dev* 2016;**13**.  
44  
45 65 IIPS, ORC Macro. *National Family Health Survey (NFHS-3) 2005-2006.* Mumbai: 2007.  
46  
47 66 Norheim OF, Jha P, Admasu K, *et al.* Avoiding 40% of the premature deaths in each country,  
48 2010–30: review of national mortality trends to help quantify the UN Sustainable  
49 Development Goal for health. *Lancet* 2015;**385**:239–52.  
50  
51 67 Liu L, Hill K, Oza S, *et al.* Levels and causes of mortality under age five years. *Int Bank*  
52 *Reconstr Dev World Bank Reprod Matern newborn, child Heal Dis Control priorities*  
53 2015;**2**:71–83.  
54  
55 68 Masquelier B, Hug L, Sharrow D, *et al.* Global, regional, and national mortality trends in older  
56 children and young adolescents from 1990 to 2016: an analysis of empirical data. *Lancet Glob*  
57 *Heal* 2018;**6**:e1087–99. doi:10.1016/S2214-109X(18)30353-X  
58  
59  
60

1  
2  
3  
4  
5  
6  
7  
8  
9  
10  
11  
12  
13  
14  
15  
16  
17  
18  
19  
20  
21  
22  
23  
24  
25  
26  
27  
28  
29  
30  
31  
32  
33  
34  
35  
36  
37  
38  
39  
40  
41  
42  
43  
44  
45  
46  
47  
48  
49  
50  
51  
52  
53  
54  
55  
56  
57  
58  
59  
60

For peer review only

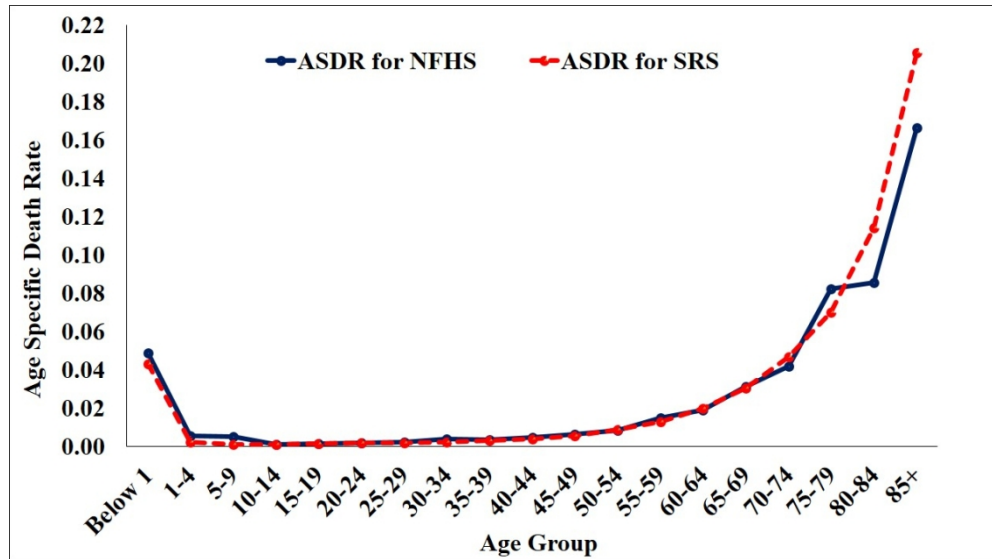

Figure 1: Age-specific Death Rate from NFHS-4 and SRS, 2011-2015, in India

54x30mm (600 x 600 DPI)

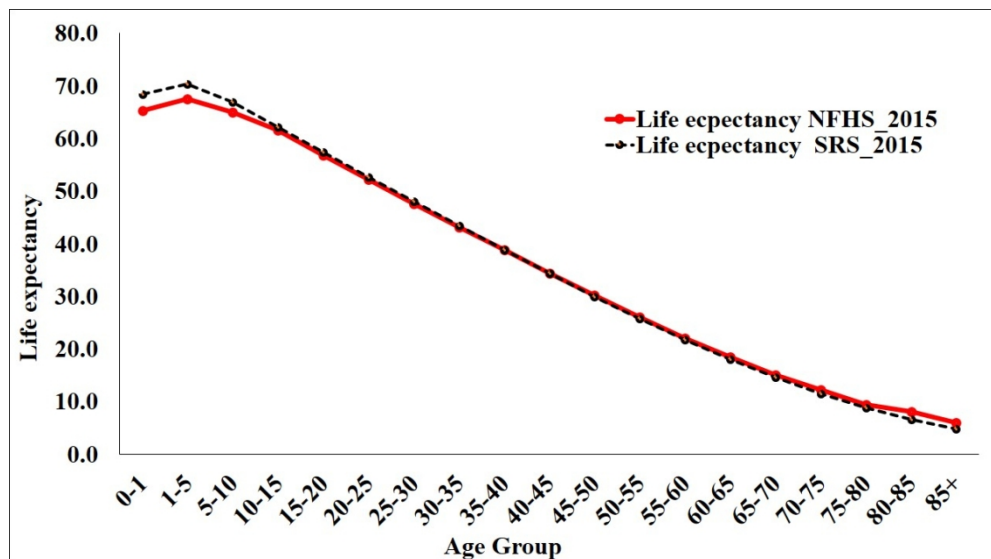

Figure 2: Estimated life expectancy at birth from NFHS-4, 2015-16 and SRS, 2011-15, in India

54x30mm (600 x 600 DPI)

1  
2  
3  
4  
5  
6  
7  
8  
9  
10  
11  
12  
13  
14  
15  
16  
17  
18  
19  
20  
21  
22  
23  
24  
25  
26  
27  
28  
29  
30  
31  
32  
33  
34  
35  
36  
37  
38  
39  
40  
41  
42  
43  
44  
45  
46  
47  
48  
49  
50  
51  
52  
53  
54  
55  
56  
57  
58  
59  
60

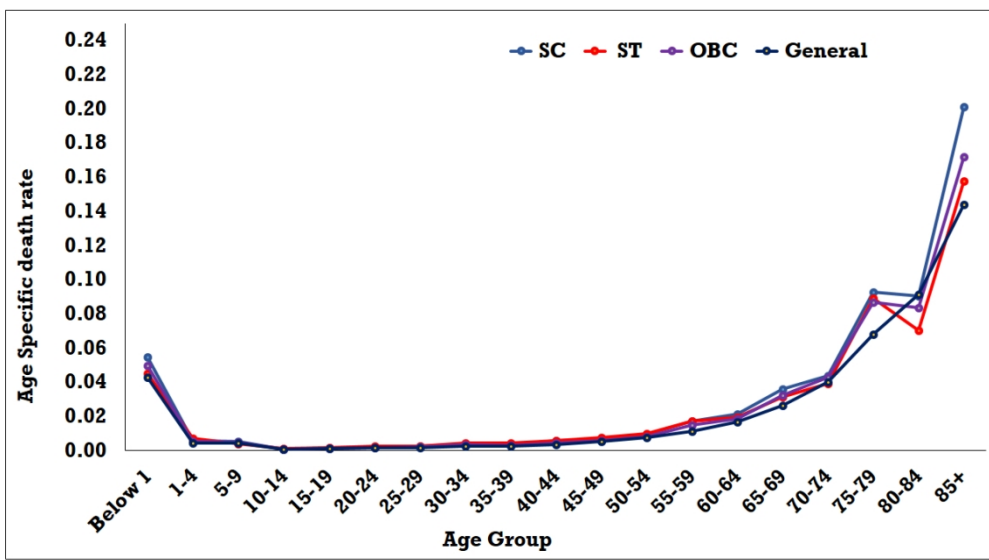

Figure 3: Age-specific death rate across caste groups in India, 2015-16  
108x60mm (300 x 300 DPI)



Figure 4: Age-specific death rate by religion in India, 2015-16

108x60mm (300 x 300 DPI)





Figure 5: Age-specific death rate across regions in India, 2015-16

108x60mm (300 x 300 DPI)

## Appendices

Appendix Table 1: 95% Confidence interval (CIs) of life expectancy by caste and sex in India, 2015-16

| Age Group      | SC          |             |             | ST          |             |             | OBC         |             |             | Other       |             |             |
|----------------|-------------|-------------|-------------|-------------|-------------|-------------|-------------|-------------|-------------|-------------|-------------|-------------|
|                | Total       | Male        | Female      |
| <b>Below 1</b> | 62.60-63.64 | 59.65-61.00 | 65.57-67.07 | 63.25-64.88 | 59.49-61.63 | 66.85-68.99 | 64.69-65.42 | 62.38-63.40 | 66.98-67.99 | 67.44-68.45 | 65.34-66.74 | 69.25-70.64 |
| <b>1</b>       | 65.21-66.13 | 62.48-63.74 | 67.83-69.22 | 65.24-66.70 | 61.97-63.87 | 68.24-70.48 | 67.04-67.69 | 64.82-65.72 | 69.15-70.10 | 69.48-70.32 | 67.48-68.78 | 71.24-72.45 |
| <b>5</b>       | 62.66-63.54 | 60.04-61.22 | 65.36-66.6  | 63.17-64.53 | 60.04-61.95 | 66.06-68.16 | 64.52-65.12 | 62.39-63.23 | 66.58-67.46 | 66.67-67.53 | 64.70-65.93 | 68.46-69.62 |
| <b>10</b>      | 59.29-60.12 | 56.66-57.78 | 61.93-63.10 | 59.39-60.70 | 56.33-58.14 | 62.23-64.22 | 61.16-61.71 | 59.02-59.80 | 63.22-64.02 | 63.22-63.96 | 61.35-62.42 | 64.92-65.95 |
| <b>15</b>      | 54.56-55.34 | 51.90-53.03 | 57.22-58.41 | 54.66-56.08 | 51.60-53.44 | 57.58-59.49 | 56.39-56.95 | 54.22-55.03 | 58.46-59.27 | 58.39-59.15 | 56.51-57.60 | 60.04-61.10 |
| <b>20</b>      | 49.98-50.79 | 47.36-48.45 | 52.59-53.76 | 50.20-51.51 | 47.09-48.91 | 53.06-54.90 | 51.75-52.30 | 49.60-50.36 | 53.88-54.63 | 53.74-54.45 | 51.83-52.90 | 55.46-56.48 |
| <b>25</b>      | 45.49-46.27 | 42.89-43.93 | 48.00-49.22 | 45.78-47.14 | 42.76-44.52 | 48.75-50.53 | 47.23-47.77 | 45.09-45.83 | 49.32-50.09 | 49.17-49.86 | 47.24-48.30 | 50.95-51.91 |
| <b>30</b>      | 41.07-41.84 | 38.57-39.58 | 43.51-44.66 | 41.39-42.72 | 38.45-40.23 | 44.24-46.05 | 42.69-43.23 | 40.66-41.42 | 44.70-45.44 | 44.56-45.28 | 42.75-43.79 | 46.26-47.17 |
| <b>35</b>      | 36.89-37.64 | 34.52-35.51 | 39.23-40.28 | 37.32-38.59 | 34.61-36.20 | 39.94-41.62 | 38.44-38.96 | 36.53-37.25 | 40.33-41.04 | 40.13-40.81 | 38.45-39.51 | 41.62-42.60 |
| <b>40</b>      | 32.51-33.23 | 30.35-31.35 | 34.62-35.70 | 33.13-34.35 | 30.51-32.24 | 35.41-37.18 | 34.02-34.54 | 32.29-32.97 | 35.72-36.45 | 35.62-36.30 | 34.14-35.13 | 36.93-37.88 |
| <b>45</b>      | 28.41-29.11 | 26.53-27.45 | 30.23-31.28 | 29.06-30.27 | 26.61-28.22 | 31.24-32.93 | 29.71-30.21 | 28.14-28.87 | 31.20-31.91 | 31.23-31.89 | 29.89-30.90 | 32.35-33.29 |
| <b>50</b>      | 24.32-25.02 | 22.59-23.52 | 25.92-27.02 | 25.09-26.29 | 22.95-24.60 | 26.99-28.64 | 25.56-26.03 | 24.24-24.90 | 26.79-27.48 | 27.00-27.62 | 25.85-26.77 | 27.95-28.83 |
| <b>55</b>      | 20.44-21.08 | 19.02-19.90 | 21.76-22.77 | 21.35-22.44 | 19.56-21.11 | 22.78-24.45 | 21.53-21.99 | 20.41-21.03 | 22.58-23.22 | 22.98-23.62 | 22.32-23.19 | 23.53-24.42 |
| <b>60</b>      | 17.07-17.71 | 15.84-16.72 | 18.20-19.20 | 18.07-19.22 | 16.69-18.21 | 19.11-20.78 | 18.01-18.48 | 17.12-17.73 | 18.82-19.47 | 19.21-19.82 | 18.73-19.59 | 19.54-20.37 |
| <b>65</b>      | 13.77-14.42 | 12.81-13.62 | 14.61-15.61 | 14.78-15.87 | 13.74-15.32 | 15.37-16.96 | 14.58-15.02 | 13.84-14.43 | 15.17-15.84 | 15.72-16.29 | 15.41-16.25 | 15.86-16.69 |
| <b>70</b>      | 11.07-11.70 | 10.32-11.16 | 11.65-12.57 | 11.92-13.06 | 10.95-12.54 | 12.42-14.15 | 11.72-12.17 | 11.17-11.73 | 12.17-12.86 | 12.62-13.23 | 12.43-13.33 | 12.69-13.50 |
| <b>75</b>      | 8.26-8.90   | 7.59-8.43   | 8.67-9.61   | 9.06-10.22  | 8.29-9.91   | 9.36-11.03  | 9.00-9.43   | 8.55-9.15   | 9.30-9.92   | 9.98-10.54  | 9.90-10.81  | 9.90-10.68  |
| <b>80</b>      | 6.96-7.46   | 6.29-7.02   | 7.39-8.15   | 8.23-9.17   | 7.54-9.02   | 8.47-9.68   | 7.77-8.13   | 7.26-7.75   | 8.12-8.64   | 8.19-8.69   | 8.29-9.06   | 8.03-8.64   |
| <b>85+</b>     | 4.97-4.97   | 4.47-4.47   | 5.43-5.43   | 6.35-6.35   | 6.32-6.32   | 6.38-6.38   | 5.82-5.82   | 5.46-5.46   | 6.15-6.15   | 6.95-6.95   | 7.97-7.97   | 6.28-6.28   |

Appendix Table 2: 95% Confidence interval (CIs) of life expectancy by religion and sex in India, 2015-16

| Age Group      | Hindu       |             |             | Muslims     |             |             | Christian   |             |             | Others      |             |             |
|----------------|-------------|-------------|-------------|-------------|-------------|-------------|-------------|-------------|-------------|-------------|-------------|-------------|
|                | Total       | Male        | Female      |
| <b>Below 1</b> | 64.74-65.22 | 62.15-62.87 | 67.34-68.09 | 65.29-66.54 | 63.57-65.25 | 66.71-68.45 | 66.44-69.60 | 61.93-66.62 | 69.81-74.30 | 67.38-69.80 | 64.32-67.56 | 69.91-73.24 |
| <b>1</b>       | 66.99-67.46 | 64.65-65.25 | 69.38-70.05 | 67.73-68.87 | 66.07-67.62 | 69.14-70.71 | 67.96-70.95 | 63.76-68.03 | 71.29-75.40 | 68.64-70.95 | 65.81-68.96 | 70.87-73.95 |
| <b>5</b>       | 64.53-64.97 | 62.22-62.84 | 66.83-67.48 | 65.00-66.10 | 63.20-64.69 | 66.52-68.10 | 65.83-68.64 | 62.17-66.13 | 68.45-72.32 | 65.57-67.66 | 63.04-66.00 | 67.43-70.38 |
| <b>10</b>      | 61.20-61.59 | 62.22-62.84 | 63.48-64.09 | 61.10-62.16 | 59.35-60.77 | 62.57-64.08 | 63.16-65.66 | 60.19-63.84 | 65.19-68.75 | 61.64-63.61 | 58.83-61.68 | 63.56-66.34 |
| <b>15</b>      | 56.42-56.83 | 54.13-54.70 | 58.73-59.32 | 56.29-57.34 | 54.49-55.91 | 57.85-59.37 | 58.35-60.91 | 55.44-59.05 | 60.40-63.75 | 56.73-58.67 | 54.03-56.72 | 58.73-61.46 |
| <b>20</b>      | 51.84-52.23 | 49.53-50.10 | 54.17-54.73 | 51.60-52.65 | 49.91-51.39 | 53.13-54.63 | 53.85-56.25 | 50.80-54.27 | 55.81-59.24 | 51.99-53.88 | 49.34-52.14 | 53.94-56.60 |
| <b>25</b>      | 47.32-47.70 | 45.03-45.56 | 49.63-50.18 | 47.12-48.10 | 45.34-46.75 | 48.57-50.05 | 49.04-51.56 | 45.97-49.55 | 51.18-54.66 | 47.34-49.23 | 44.85-47.72 | 49.12-51.86 |
| <b>30</b>      | 42.81-43.20 | 40.62-41.17 | 45.07-45.60 | 42.42-43.45 | 40.78-42.16 | 43.90-45.38 | 44.56-46.86 | 41.71-45.07 | 46.49-49.82 | 42.81-44.80 | 40.40-43.24 | 44.54-47.38 |
| <b>35</b>      | 38.57-38.96 | 36.59-37.10 | 40.61-41.17 | 38.01-38.99 | 36.40-37.75 | 39.33-40.82 | 40.29-42.74 | 37.38-40.73 | 42.33-45.52 | 38.42-40.37 | 36.48-39.11 | 40.04-42.61 |
| <b>40</b>      | 34.17-34.54 | 32.34-32.87 | 36.02-36.56 | 33.49-34.51 | 32.01-33.35 | 34.83-36.23 | 35.98-38.23 | 33.27-36.70 | 37.57-40.76 | 34.46-36.33 | 32.34-34.82 | 35.89-38.42 |
| <b>45</b>      | 29.92-30.29 | 28.31-28.80 | 31.55-32.07 | 29.07-30.02 | 27.65-28.90 | 30.32-31.71 | 31.76-34.00 | 29.71-32.73 | 33.34-36.20 | 30.30-32.15 | 28.57-31.02 | 31.43-33.98 |
| <b>50</b>      | 25.78-26.14 | 24.36-24.83 | 27.18-27.70 | 24.88-25.82 | 23.53-24.82 | 25.91-27.27 | 27.86-30.05 | 25.97-29.02 | 28.70-31.96 | 26.30-27.99 | 24.58-27.02 | 27.25-29.64 |
| <b>55</b>      | 21.80-22.14 | 20.72-21.16 | 22.88-23.37 | 20.87-21.73 | 19.70-20.93 | 21.76-23.12 | 23.74-25.86 | 22.42-25.27 | 24.21-27.32 | 22.25-23.88 | 20.92-23.23 | 22.94-25.38 |
| <b>60</b>      | 18.29-18.60 | 17.42-17.85 | 19.13-19.61 | 17.44-18.31 | 16.50-17.68 | 18.11-19.46 | 19.96-22.08 | 18.54-21.62 | 20.57-23.57 | 18.74-20.36 | 17.90-20.05 | 19.01-21.43 |
| <b>65</b>      | 14.85-15.16 | 14.15-14.58 | 15.46-15.94 | 14.21-15.11 | 13.54-14.77 | 14.60-15.90 | 16.67-18.72 | 15.75-18.76 | 16.77-19.73 | 15.23-16.81 | 14.30-16.41 | 15.65-17.96 |
| <b>70</b>      | 11.95-12.27 | 11.38-11.82 | 12.41-12.90 | 11.66-12.57 | 11.17-12.48 | 11.81-13.10 | 13.08-15.14 | 12.44-15.37 | 12.94-15.93 | 12.12-13.70 | 11.45-13.57 | 12.27-14.46 |
| <b>75</b>      | 9.21-9.53   | 8.76-9.20   | 9.58-10.04  | 8.92-9.81   | 8.87-10.10  | 8.60-9.87   | 10.46-12.44 | 9.97-12.93  | 10.06-13.04 | 8.99-10.54  | 8.17-10.30  | 9.28-11.46  |
| <b>80</b>      | 7.84-8.11   | 7.41-7.80   | 8.15-8.51   | 7.68-8.36   | 7.44-8.52   | 7.52-8.59   | 8.26-10.10  | 8.15-10.52  | 7.66-10.22  | 7.66-8.89   | 6.93-8.77   | 7.97-9.46   |
| <b>85+</b>     | 5.97-5.97   | 5.85-5.85   | 6.09-6.09   | 5.86-5.86   | 5.86-5.86   | 5.89-5.89   | 7.91-7.91   | 7.89-7.89   | 7.96-7.96   | 6.32-6.32   | 6.68-6.68   | 6.06-6.06   |

Appendix Table 3: 95% Confidence interval (CIs) of life expectancy by regions and sex in India, 2015-16

| Age Group      | Northeast   |             |             | East        |             |             | North       |             |             |
|----------------|-------------|-------------|-------------|-------------|-------------|-------------|-------------|-------------|-------------|
|                | Total       | Male        | Female      | Total       | Male        | Female      | Total       | Male        | Female      |
| <b>Below 1</b> | 62.43-65.00 | 59.15-62.58 | 65.40-68.81 | 63.12-64.04 | 61.68-63.07 | 64.15-65.45 | 68.06-69.34 | 65.17-66.86 | 70.96-72.73 |
| <b>1</b>       | 65.02-67.28 | 61.94-65.26 | 67.38-70.95 | 65.95-66.82 | 64.62-65.79 | 66.95-68.18 | 69.68-70.83 | 66.99-68.52 | 72.37-73.93 |
| <b>5</b>       | 62.98-65.25 | 60.16-63.13 | 65.26-68.68 | 63.20-64.00 | 61.82-62.99 | 64.20-65.37 | 66.67-67.66 | 64.07-65.51 | 69.12-70.71 |
| <b>10</b>      | 59.13-61.32 | 56.34-59.35 | 61.65-64.83 | 59.82-60.58 | 58.44-59.54 | 60.88-61.98 | 62.62-63.66 | 60.05-61.46 | 65.11-66.52 |
| <b>15</b>      | 54.50-56.59 | 51.63-54.68 | 56.94-59.96 | 55.09-55.82 | 53.69-54.78 | 56.19-57.24 | 57.79-58.82 | 55.25-56.61 | 60.20-61.80 |
| <b>20</b>      | 50.04-52.05 | 47.20-50.05 | 52.30-55.35 | 50.49-51.26 | 49.08-50.19 | 51.60-52.64 | 53.13-54.09 | 50.57-51.92 | 55.65-57.10 |
| <b>25</b>      | 45.49-47.54 | 42.74-45.43 | 47.66-50.68 | 45.98-46.71 | 44.60-45.64 | 47.08-48.07 | 48.50-49.51 | 45.93-47.33 | 50.99-52.44 |
| <b>30</b>      | 41.00-43.05 | 38.32-41.08 | 43.20-46.19 | 41.44-42.14 | 40.12-41.13 | 42.47-43.48 | 43.88-44.89 | 41.41-42.78 | 46.24-47.72 |
| <b>35</b>      | 36.72-38.73 | 34.34-37.02 | 38.70-41.69 | 37.24-37.92 | 36.05-37.03 | 38.17-39.20 | 39.53-40.50 | 37.23-38.50 | 41.71-43.13 |
| <b>40</b>      | 32.39-34.38 | 30.10-32.76 | 34.39-37.26 | 32.82-33.49 | 31.85-32.80 | 33.57-34.56 | 35.08-36.03 | 32.92-34.16 | 37.17-38.58 |
| <b>45</b>      | 28.30-30.21 | 26.12-28.79 | 29.90-32.82 | 28.59-29.25 | 27.83-28.73 | 29.18-30.10 | 30.75-31.66 | 28.75-29.93 | 32.61-34.00 |
| <b>50</b>      | 24.34-26.22 | 22.57-25.10 | 25.66-28.40 | 24.42-25.03 | 23.78-24.59 | 24.85-25.79 | 26.64-27.55 | 24.82-26.01 | 28.28-29.61 |
| <b>55</b>      | 20.48-22.39 | 19.13-21.56 | 21.45-24.39 | 20.49-21.09 | 19.99-20.82 | 20.76-21.62 | 22.57-23.46 | 21.10-22.26 | 24.00-25.31 |
| <b>60</b>      | 16.93-18.84 | 15.87-18.25 | 17.62-20.61 | 17.05-17.62 | 16.69-17.51 | 17.19-18.02 | 18.98-19.78 | 17.86-18.93 | 19.94-21.25 |
| <b>65</b>      | 14.08-15.87 | 13.10-15.53 | 14.38-17.14 | 13.57-14.12 | 13.34-14.12 | 13.59-14.48 | 15.30-16.15 | 14.31-15.40 | 16.15-17.47 |
| <b>70</b>      | 11.39-13.15 | 10.72-13.14 | 11.26-14.00 | 10.85-11.42 | 10.61-11.39 | 10.91-11.73 | 12.44-13.28 | 11.59-12.62 | 13.13-14.39 |
| <b>75</b>      | 8.81-10.59  | 8.19-10.48  | 8.82-11.46  | 8.10-8.66   | 7.85-8.61   | 8.15-8.98   | 9.33-10.13  | 8.55-9.60   | 9.90-11.18  |
| <b>80</b>      | 7.28-8.73   | 6.85-8.72   | 7.11-9.36   | 6.93-7.38   | 6.89-7.53   | 6.83-7.46   | 7.80-8.43   | 6.86-7.76   | 8.45-9.44   |
| <b>85+</b>     | 6.01-6.01   | 5.74-5.74   | 6.29-6.29   | 4.94-4.94   | 5.18-5.18   | 4.74-4.74   | 6.28-6.28   | 5.63-5.63   | 6.95-6.95   |

Appendix Table 3 (Continued): 95% Confidence interval (CIs) of life expectancy by regions and sex in India, 2015-16

| Age Group      | Central     |             |             | West        |             |             | South       |             |             |
|----------------|-------------|-------------|-------------|-------------|-------------|-------------|-------------|-------------|-------------|
|                | Total       | Male        | Female      | Total       | Male        | Female      | Total       | Male        | Female      |
| <b>Below 1</b> | 63.29-64.20 | 61.16-62.50 | 65.20-66.66 | 68.07-69.21 | 65.42-67.09 | 70.40-72.12 | 64.30-65.40 | 60.18-61.74 | 68.43-70.03 |
| <b>1</b>       | 66.17-66.96 | 64.17-65.34 | 67.94-69.14 | 69.03-70.13 | 66.56-68.00 | 71.36-72.93 | 66.19-67.19 | 62.43-63.88 | 69.90-71.33 |
| <b>5</b>       | 63.56-64.34 | 61.49-62.56 | 65.48-66.66 | 66.27-67.30 | 63.80-65.16 | 68.55-70.09 | 64.53-65.50 | 61.23-62.53 | 67.82-69.15 |
| <b>10</b>      | 59.73-60.51 | 57.74-58.81 | 61.62-62.73 | 62.44-63.42 | 59.74-61.10 | 65.03-66.43 | 62.49-63.29 | 59.38-60.52 | 65.51-66.63 |
| <b>15</b>      | 55.02-55.75 | 52.97-54.06 | 56.88-58.01 | 57.62-58.51 | 54.86-56.16 | 60.20-61.56 | 57.68-58.46 | 54.60-55.73 | 60.65-61.85 |
| <b>20</b>      | 50.48-51.20 | 48.46-49.55 | 52.36-53.43 | 52.98-53.89 | 50.16-51.45 | 55.69-56.94 | 53.02-53.81 | 49.97-51.10 | 56.00-57.05 |
| <b>25</b>      | 46.06-46.78 | 44.05-45.08 | 47.93-48.98 | 48.39-49.29 | 45.55-46.87 | 51.14-52.44 | 48.42-49.19 | 45.42-46.56 | 51.32-52.41 |
| <b>30</b>      | 41.63-42.38 | 39.73-40.74 | 43.45-44.50 | 43.84-44.66 | 41.07-42.28 | 46.51-47.78 | 44.00-44.73 | 41.11-42.21 | 46.66-47.76 |
| <b>35</b>      | 37.41-38.14 | 35.71-36.66 | 39.07-40.10 | 39.45-40.30 | 36.82-38.02 | 41.92-43.17 | 39.72-40.47 | 37.14-38.18 | 42.19-43.23 |
| <b>40</b>      | 32.97-33.69 | 31.31-32.28 | 34.52-35.52 | 34.99-35.83 | 32.50-33.72 | 37.33-38.49 | 35.41-36.12 | 33.01-34.09 | 37.62-38.65 |
| <b>45</b>      | 28.77-29.44 | 27.24-28.16 | 30.17-31.13 | 30.70-31.55 | 28.48-29.67 | 32.73-33.95 | 31.14-31.84 | 29.06-30.01 | 33.08-34.10 |
| <b>50</b>      | 24.58-25.24 | 23.19-24.11 | 25.80-26.78 | 26.58-27.37 | 24.57-25.76 | 28.28-29.46 | 26.97-27.69 | 25.18-26.13 | 28.65-29.67 |
| <b>55</b>      | 20.68-21.32 | 19.56-20.41 | 21.72-22.70 | 22.45-23.24 | 21.00-22.10 | 23.72-24.87 | 22.96-23.63 | 21.50-22.45 | 24.28-25.26 |
| <b>60</b>      | 17.22-17.83 | 16.29-17.08 | 18.05-18.94 | 18.92-19.63 | 17.80-18.84 | 19.75-20.88 | 19.50-20.17 | 18.26-19.19 | 20.56-21.56 |
| <b>65</b>      | 14.02-14.61 | 13.29-14.10 | 14.58-15.51 | 15.47-16.23 | 14.60-15.59 | 16.03-17.20 | 16.01-16.67 | 15.07-15.99 | 16.73-17.73 |
| <b>70</b>      | 11.36-11.98 | 10.72-11.52 | 11.85-12.72 | 12.26-12.97 | 11.52-12.56 | 12.69-13.75 | 13.05-13.73 | 12.40-13.33 | 13.47-14.44 |
| <b>75</b>      | 8.61-9.20   | 8.05-8.84   | 9.00-9.83   | 9.54-10.29  | 9.11-10.16  | 9.64-10.73  | 10.54-11.23 | 10.17-11.11 | 10.64-11.63 |
| <b>80</b>      | 7.50-7.98   | 7.08-7.77   | 7.77-8.44   | 7.93-8.62   | 7.37-8.39   | 8.20-9.05   | 9.06-9.65   | 8.57-9.48   | 9.23-10.07  |
| <b>85+</b>     | 5.67-5.67   | 5.67-5.67   | 5.68-5.68   | 6.49-6.49   | 6.70-6.70   | 6.38-6.38   | 7.55-7.55   | 7.35-7.35   | 7.72-7.72   |

**STROBE 2007 (v4) Statement—Checklist of items that should be included in reports of *cross-sectional studies***

| Section/Topic                | Item # | Recommendation                                                                                                                                                                       | Reported on page # |
|------------------------------|--------|--------------------------------------------------------------------------------------------------------------------------------------------------------------------------------------|--------------------|
| <b>Title and abstract</b>    | 1      | (a) Indicate the study's design with a commonly used term in the title or the abstract                                                                                               | 1                  |
|                              |        | (b) Provide in the abstract an informative and balanced summary of what was done and what was found                                                                                  | 1                  |
| <b>Introduction</b>          |        |                                                                                                                                                                                      |                    |
| Background/rationale         | 2      | Explain the scientific background and rationale for the investigation being reported                                                                                                 | 2                  |
| Objectives                   | 3      | State specific objectives, including any prespecified hypotheses                                                                                                                     | 3                  |
| <b>Methods</b>               |        |                                                                                                                                                                                      |                    |
| Study design                 | 4      | Present key elements of study design early in the paper                                                                                                                              | 3                  |
| Setting                      | 5      | Describe the setting, locations, and relevant dates, including periods of recruitment, exposure, follow-up, and data collection                                                      | 3                  |
| Participants                 | 6      | (a) Give the eligibility criteria, and the sources and methods of selection of participants                                                                                          | 3-4                |
| Variables                    | 7      | Clearly define all outcomes, exposures, predictors, potential confounders, and effect modifiers. Give diagnostic criteria, if applicable                                             | 4                  |
| Data sources/<br>measurement | 8*     | For each variable of interest, give sources of data and details of methods of assessment (measurement). Describe comparability of assessment methods if there is more than one group | 3-4                |
| Bias                         | 9      | Describe any efforts to address potential sources of bias                                                                                                                            | NA                 |
| Study size                   | 10     | Explain how the study size was arrived at                                                                                                                                            | 4                  |
| Quantitative variables       | 11     | Explain how quantitative variables were handled in the analyses. If applicable, describe which groupings were chosen and why                                                         | 3-4                |
| Statistical methods          | 12     | (a) Describe all statistical methods, including those used to control for confounding                                                                                                | 4                  |
|                              |        | (b) Describe any methods used to examine subgroups and interactions                                                                                                                  | 4                  |
|                              |        | (c) Explain how missing data were addressed                                                                                                                                          | 4                  |
|                              |        | (d) If applicable, describe analytical methods taking account of sampling strategy                                                                                                   | 4                  |
|                              |        | (e) Describe any sensitivity analyses                                                                                                                                                | NA                 |
| <b>Results</b>               |        |                                                                                                                                                                                      |                    |

|                          |     |                                                                                                                                                                                                              |     |
|--------------------------|-----|--------------------------------------------------------------------------------------------------------------------------------------------------------------------------------------------------------------|-----|
| Participants             | 13* | (a) Report numbers of individuals at each stage of study—eg numbers potentially eligible, examined for eligibility, confirmed eligible, included in the study, completing follow-up, and analysed            | 4   |
|                          |     | (b) Give reasons for non-participation at each stage                                                                                                                                                         | 4-6 |
|                          |     | (c) Consider use of a flow diagram                                                                                                                                                                           | NA  |
| Descriptive data         | 14* | (a) Give characteristics of study participants (eg demographic, clinical, social) and information on exposures and potential confounders                                                                     | 4-6 |
|                          |     | (b) Indicate number of participants with missing data for each variable of interest                                                                                                                          | 4   |
| Outcome data             | 15* | Report numbers of outcome events or summary measures                                                                                                                                                         |     |
| Main results             | 16  | (a) Give unadjusted estimates and, if applicable, confounder-adjusted estimates and their precision (eg, 95% confidence interval). Make clear which confounders were adjusted for and why they were included | 4-6 |
|                          |     | (b) Report category boundaries when continuous variables were categorized                                                                                                                                    | NA  |
|                          |     | (c) If relevant, consider translating estimates of relative risk into absolute risk for a meaningful time period                                                                                             | NA  |
| Other analyses           | 17  | Report other analyses done—eg analyses of subgroups and interactions, and sensitivity analyses                                                                                                               | NA  |
| <b>Discussion</b>        |     |                                                                                                                                                                                                              |     |
| Key results              | 18  | Summarise key results with reference to study objectives                                                                                                                                                     | 5-6 |
| Limitations              | 19  | Discuss limitations of the study, taking into account sources of potential bias or imprecision. Discuss both direction and magnitude of any potential bias                                                   | 7-8 |
| Interpretation           | 20  | Give a cautious overall interpretation of results considering objectives, limitations, multiplicity of analyses, results from similar studies, and other relevant evidence                                   | 7-8 |
| Generalisability         | 21  | Discuss the generalisability (external validity) of the study results                                                                                                                                        | 7-8 |
| <b>Other information</b> |     |                                                                                                                                                                                                              |     |
| Funding                  | 22  | Give the source of funding and the role of the funders for the present study and, if applicable, for the original study on which the present article is based                                                | NA  |

\*Give information separately for cases and controls in case-control studies and, if applicable, for exposed and unexposed groups in cohort and cross-sectional studies.

**Note:** An Explanation and Elaboration article discusses each checklist item and gives methodological background and published examples of transparent reporting. The STROBE checklist is best used in conjunction with this article (freely available on the Web sites of PLoS Medicine at <http://www.plosmedicine.org/>, Annals of Internal Medicine at <http://www.annals.org/>, and Epidemiology at <http://www.epidem.com/>). Information on the STROBE Initiative is available at [www.strobe-statement.org](http://www.strobe-statement.org).
