# Supplementary material for: Caste, religion and regional differentials in life expectancy at birth in India: cross-sectional estimates from recent National Family Health Survey
Source: PubMed Central journal article supplement — BMJ Open. 2020 Aug 20;10(8):e035392. doi: 10.1136/bmjopen-2019-035392 (PMC7440832; doi:10.1136/bmjopen-2019-035392), 2020-08-20
Supplement: bmjopen-2019-035392supp001.pdf [file bmjopen-2019-035392supp001.pdf]

## Appendices

Appendix Table 1: 95% Confidence interval (CIs) of life expectancy by caste and sex in India, 2015-16

| Age Group      | SC          |             |             | ST          |             |             | OBC         |             |             | Other       |             |             |
|----------------|-------------|-------------|-------------|-------------|-------------|-------------|-------------|-------------|-------------|-------------|-------------|-------------|
|                | Total       | Male        | Female      |
| <b>Below 1</b> | 62.60-63.64 | 59.65-61.00 | 65.57-67.07 | 63.25-64.88 | 59.49-61.63 | 66.85-68.99 | 64.69-65.42 | 62.38-63.40 | 66.98-67.99 | 67.44-68.45 | 65.34-66.74 | 69.25-70.64 |
| <b>1</b>       | 65.21-66.13 | 62.48-63.74 | 67.83-69.22 | 65.24-66.70 | 61.97-63.87 | 68.24-70.48 | 67.04-67.69 | 64.82-65.72 | 69.15-70.10 | 69.48-70.32 | 67.48-68.78 | 71.24-72.45 |
| <b>5</b>       | 62.66-63.54 | 60.04-61.22 | 65.36-66.6  | 63.17-64.53 | 60.04-61.95 | 66.06-68.16 | 64.52-65.12 | 62.39-63.23 | 66.58-67.46 | 66.67-67.53 | 64.70-65.93 | 68.46-69.62 |
| <b>10</b>      | 59.29-60.12 | 56.66-57.78 | 61.93-63.10 | 59.39-60.70 | 56.33-58.14 | 62.23-64.22 | 61.16-61.71 | 59.02-59.80 | 63.22-64.02 | 63.22-63.96 | 61.35-62.42 | 64.92-65.95 |
| <b>15</b>      | 54.56-55.34 | 51.90-53.03 | 57.22-58.41 | 54.66-56.08 | 51.60-53.44 | 57.58-59.49 | 56.39-56.95 | 54.22-55.03 | 58.46-59.27 | 58.39-59.15 | 56.51-57.60 | 60.04-61.10 |
| <b>20</b>      | 49.98-50.79 | 47.36-48.45 | 52.59-53.76 | 50.20-51.51 | 47.09-48.91 | 53.06-54.90 | 51.75-52.30 | 49.60-50.36 | 53.88-54.63 | 53.74-54.45 | 51.83-52.90 | 55.46-56.48 |
| <b>25</b>      | 45.49-46.27 | 42.89-43.93 | 48.00-49.22 | 45.78-47.14 | 42.76-44.52 | 48.75-50.53 | 47.23-47.77 | 45.09-45.83 | 49.32-50.09 | 49.17-49.86 | 47.24-48.30 | 50.95-51.91 |
| <b>30</b>      | 41.07-41.84 | 38.57-39.58 | 43.51-44.66 | 41.39-42.72 | 38.45-40.23 | 44.24-46.05 | 42.69-43.23 | 40.66-41.42 | 44.70-45.44 | 44.56-45.28 | 42.75-43.79 | 46.26-47.17 |
| <b>35</b>      | 36.89-37.64 | 34.52-35.51 | 39.23-40.28 | 37.32-38.59 | 34.61-36.20 | 39.94-41.62 | 38.44-38.96 | 36.53-37.25 | 40.33-41.04 | 40.13-40.81 | 38.45-39.51 | 41.62-42.60 |
| <b>40</b>      | 32.51-33.23 | 30.35-31.35 | 34.62-35.70 | 33.13-34.35 | 30.51-32.24 | 35.41-37.18 | 34.02-34.54 | 32.29-32.97 | 35.72-36.45 | 35.62-36.30 | 34.14-35.13 | 36.93-37.88 |
| <b>45</b>      | 28.41-29.11 | 26.53-27.45 | 30.23-31.28 | 29.06-30.27 | 26.61-28.22 | 31.24-32.93 | 29.71-30.21 | 28.14-28.87 | 31.20-31.91 | 31.23-31.89 | 29.89-30.90 | 32.35-33.29 |
| <b>50</b>      | 24.32-25.02 | 22.59-23.52 | 25.92-27.02 | 25.09-26.29 | 22.95-24.60 | 26.99-28.64 | 25.56-26.03 | 24.24-24.90 | 26.79-27.48 | 27.00-27.62 | 25.85-26.77 | 27.95-28.83 |
| <b>55</b>      | 20.44-21.08 | 19.02-19.90 | 21.76-22.77 | 21.35-22.44 | 19.56-21.11 | 22.78-24.45 | 21.53-21.99 | 20.41-21.03 | 22.58-23.22 | 22.98-23.62 | 22.32-23.19 | 23.53-24.42 |
| <b>60</b>      | 17.07-17.71 | 15.84-16.72 | 18.20-19.20 | 18.07-19.22 | 16.69-18.21 | 19.11-20.78 | 18.01-18.48 | 17.12-17.73 | 18.82-19.47 | 19.21-19.82 | 18.73-19.59 | 19.54-20.37 |
| <b>65</b>      | 13.77-14.42 | 12.81-13.62 | 14.61-15.61 | 14.78-15.87 | 13.74-15.32 | 15.37-16.96 | 14.58-15.02 | 13.84-14.43 | 15.17-15.84 | 15.72-16.29 | 15.41-16.25 | 15.86-16.69 |
| <b>70</b>      | 11.07-11.70 | 10.32-11.16 | 11.65-12.57 | 11.92-13.06 | 10.95-12.54 | 12.42-14.15 | 11.72-12.17 | 11.17-11.73 | 12.17-12.86 | 12.62-13.23 | 12.43-13.33 | 12.69-13.50 |
| <b>75</b>      | 8.26-8.90   | 7.59-8.43   | 8.67-9.61   | 9.06-10.22  | 8.29-9.91   | 9.36-11.03  | 9.00-9.43   | 8.55-9.15   | 9.30-9.92   | 9.98-10.54  | 9.90-10.81  | 9.90-10.68  |
| <b>80</b>      | 6.96-7.46   | 6.29-7.02   | 7.39-8.15   | 8.23-9.17   | 7.54-9.02   | 8.47-9.68   | 7.77-8.13   | 7.26-7.75   | 8.12-8.64   | 8.19-8.69   | 8.29-9.06   | 8.03-8.64   |
| <b>85+</b>     | 4.97-4.97   | 4.47-4.47   | 5.43-5.43   | 6.35-6.35   | 6.32-6.32   | 6.38-6.38   | 5.82-5.82   | 5.46-5.46   | 6.15-6.15   | 6.95-6.95   | 7.97-7.97   | 6.28-6.28   |

**Appendix Table 2: 95% Confidence interval (CIs) of life expectancy by religion and sex in India, 2015-16**

| Age Group      | Hindu       |             |             | Muslims     |             |             | Christian   |             |             | Others      |             |             |
|----------------|-------------|-------------|-------------|-------------|-------------|-------------|-------------|-------------|-------------|-------------|-------------|-------------|
|                | Total       | Male        | Female      |
| <b>Below 1</b> | 64.74-65.22 | 62.15-62.87 | 67.34-68.09 | 65.29-66.54 | 63.57-65.25 | 66.71-68.45 | 66.44-69.60 | 61.93-66.62 | 69.81-74.30 | 67.38-69.80 | 64.32-67.56 | 69.91-73.24 |
| <b>1</b>       | 66.99-67.46 | 64.65-65.25 | 69.38-70.05 | 67.73-68.87 | 66.07-67.62 | 69.14-70.71 | 67.96-70.95 | 63.76-68.03 | 71.29-75.40 | 68.64-70.95 | 65.81-68.96 | 70.87-73.95 |
| <b>5</b>       | 64.53-64.97 | 62.22-62.84 | 66.83-67.48 | 65.00-66.10 | 63.20-64.69 | 66.52-68.10 | 65.83-68.64 | 62.17-66.13 | 68.45-72.32 | 65.57-67.66 | 63.04-66.00 | 67.43-70.38 |
| <b>10</b>      | 61.20-61.59 | 62.22-62.84 | 63.48-64.09 | 61.10-62.16 | 59.35-60.77 | 62.57-64.08 | 63.16-65.66 | 60.19-63.84 | 65.19-68.75 | 61.64-63.61 | 58.83-61.68 | 63.56-66.34 |
| <b>15</b>      | 56.42-56.83 | 54.13-54.70 | 58.73-59.32 | 56.29-57.34 | 54.49-55.91 | 57.85-59.37 | 58.35-60.91 | 55.44-59.05 | 60.40-63.75 | 56.73-58.67 | 54.03-56.72 | 58.73-61.46 |
| <b>20</b>      | 51.84-52.23 | 49.53-50.10 | 54.17-54.73 | 51.60-52.65 | 49.91-51.39 | 53.13-54.63 | 53.85-56.25 | 50.80-54.27 | 55.81-59.24 | 51.99-53.88 | 49.34-52.14 | 53.94-56.60 |
| <b>25</b>      | 47.32-47.70 | 45.03-45.56 | 49.63-50.18 | 47.12-48.10 | 45.34-46.75 | 48.57-50.05 | 49.04-51.56 | 45.97-49.55 | 51.18-54.66 | 47.34-49.23 | 44.85-47.72 | 49.12-51.86 |
| <b>30</b>      | 42.81-43.20 | 40.62-41.17 | 45.07-45.60 | 42.42-43.45 | 40.78-42.16 | 43.90-45.38 | 44.56-46.86 | 41.71-45.07 | 46.49-49.82 | 42.81-44.80 | 40.40-43.24 | 44.54-47.38 |
| <b>35</b>      | 38.57-38.96 | 36.59-37.10 | 40.61-41.17 | 38.01-38.99 | 36.40-37.75 | 39.33-40.82 | 40.29-42.74 | 37.38-40.73 | 42.33-45.52 | 38.42-40.37 | 36.48-39.11 | 40.04-42.61 |
| <b>40</b>      | 34.17-34.54 | 32.34-32.87 | 36.02-36.56 | 33.49-34.51 | 32.01-33.35 | 34.83-36.23 | 35.98-38.23 | 33.27-36.70 | 37.57-40.76 | 34.46-36.33 | 32.34-34.82 | 35.89-38.42 |
| <b>45</b>      | 29.92-30.29 | 28.31-28.80 | 31.55-32.07 | 29.07-30.02 | 27.65-28.90 | 30.32-31.71 | 31.76-34.00 | 29.71-32.73 | 33.34-36.20 | 30.30-32.15 | 28.57-31.02 | 31.43-33.98 |
| <b>50</b>      | 25.78-26.14 | 24.36-24.83 | 27.18-27.70 | 24.88-25.82 | 23.53-24.82 | 25.91-27.27 | 27.86-30.05 | 25.97-29.02 | 28.70-31.96 | 26.30-27.99 | 24.58-27.02 | 27.25-29.64 |
| <b>55</b>      | 21.80-22.14 | 20.72-21.16 | 22.88-23.37 | 20.87-21.73 | 19.70-20.93 | 21.76-23.12 | 23.74-25.86 | 22.42-25.27 | 24.21-27.32 | 22.25-23.88 | 20.92-23.23 | 22.94-25.38 |
| <b>60</b>      | 18.29-18.60 | 17.42-17.85 | 19.13-19.61 | 17.44-18.31 | 16.50-17.68 | 18.11-19.46 | 19.96-22.08 | 18.54-21.62 | 20.57-23.57 | 18.74-20.36 | 17.90-20.05 | 19.01-21.43 |
| <b>65</b>      | 14.85-15.16 | 14.15-14.58 | 15.46-15.94 | 14.21-15.11 | 13.54-14.77 | 14.60-15.90 | 16.67-18.72 | 15.75-18.76 | 16.77-19.73 | 15.23-16.81 | 14.30-16.41 | 15.65-17.96 |
| <b>70</b>      | 11.95-12.27 | 11.38-11.82 | 12.41-12.90 | 11.66-12.57 | 11.17-12.48 | 11.81-13.10 | 13.08-15.14 | 12.44-15.37 | 12.94-15.93 | 12.12-13.70 | 11.45-13.57 | 12.27-14.46 |
| <b>75</b>      | 9.21-9.53   | 8.76-9.20   | 9.58-10.04  | 8.92-9.81   | 8.87-10.10  | 8.60-9.87   | 10.46-12.44 | 9.97-12.93  | 10.06-13.04 | 8.99-10.54  | 8.17-10.30  | 9.28-11.46  |
| <b>80</b>      | 7.84-8.11   | 7.41-7.80   | 8.15-8.51   | 7.68-8.36   | 7.44-8.52   | 7.52-8.59   | 8.26-10.10  | 8.15-10.52  | 7.66-10.22  | 7.66-8.89   | 6.93-8.77   | 7.97-9.46   |
| <b>85+</b>     | 5.97-5.97   | 5.85-5.85   | 6.09-6.09   | 5.86-5.86   | 5.86-5.86   | 5.89-5.89   | 7.91-7.91   | 7.89-7.89   | 7.96-7.96   | 6.32-6.32   | 6.68-6.68   | 6.06-6.06   |

**Appendix Table 3: 95% Confidence interval (CIs) of life expectancy by regions and sex in India, 2015-16**

| Age Group      | Northeast   |             |             | East        |             |             | North       |             |             |
|----------------|-------------|-------------|-------------|-------------|-------------|-------------|-------------|-------------|-------------|
|                | Total       | Male        | Female      | Total       | Male        | Female      | Total       | Male        | Female      |
| <b>Below 1</b> | 62.43-65.00 | 59.15-62.58 | 65.40-68.81 | 63.12-64.04 | 61.68-63.07 | 64.15-65.45 | 68.06-69.34 | 65.17-66.86 | 70.96-72.73 |
| <b>1</b>       | 65.02-67.28 | 61.94-65.26 | 67.38-70.95 | 65.95-66.82 | 64.62-65.79 | 66.95-68.18 | 69.68-70.83 | 66.99-68.52 | 72.37-73.93 |
| <b>5</b>       | 62.98-65.25 | 60.16-63.13 | 65.26-68.68 | 63.20-64.00 | 61.82-62.99 | 64.20-65.37 | 66.67-67.66 | 64.07-65.51 | 69.12-70.71 |
| <b>10</b>      | 59.13-61.32 | 56.34-59.35 | 61.65-64.83 | 59.82-60.58 | 58.44-59.54 | 60.88-61.98 | 62.62-63.66 | 60.05-61.46 | 65.11-66.52 |
| <b>15</b>      | 54.50-56.59 | 51.63-54.68 | 56.94-59.96 | 55.09-55.82 | 53.69-54.78 | 56.19-57.24 | 57.79-58.82 | 55.25-56.61 | 60.20-61.80 |
| <b>20</b>      | 50.04-52.05 | 47.20-50.05 | 52.30-55.35 | 50.49-51.26 | 49.08-50.19 | 51.60-52.64 | 53.13-54.09 | 50.57-51.92 | 55.65-57.10 |
| <b>25</b>      | 45.49-47.54 | 42.74-45.43 | 47.66-50.68 | 45.98-46.71 | 44.60-45.64 | 47.08-48.07 | 48.50-49.51 | 45.93-47.33 | 50.99-52.44 |
| <b>30</b>      | 41.00-43.05 | 38.32-41.08 | 43.20-46.19 | 41.44-42.14 | 40.12-41.13 | 42.47-43.48 | 43.88-44.89 | 41.41-42.78 | 46.24-47.72 |
| <b>35</b>      | 36.72-38.73 | 34.34-37.02 | 38.70-41.69 | 37.24-37.92 | 36.05-37.03 | 38.17-39.20 | 39.53-40.50 | 37.23-38.50 | 41.71-43.13 |
| <b>40</b>      | 32.39-34.38 | 30.10-32.76 | 34.39-37.26 | 32.82-33.49 | 31.85-32.80 | 33.57-34.56 | 35.08-36.03 | 32.92-34.16 | 37.17-38.58 |
| <b>45</b>      | 28.30-30.21 | 26.12-28.79 | 29.90-32.82 | 28.59-29.25 | 27.83-28.73 | 29.18-30.10 | 30.75-31.66 | 28.75-29.93 | 32.61-34.00 |
| <b>50</b>      | 24.34-26.22 | 22.57-25.10 | 25.66-28.40 | 24.42-25.03 | 23.78-24.59 | 24.85-25.79 | 26.64-27.55 | 24.82-26.01 | 28.28-29.61 |
| <b>55</b>      | 20.48-22.39 | 19.13-21.56 | 21.45-24.39 | 20.49-21.09 | 19.99-20.82 | 20.76-21.62 | 22.57-23.46 | 21.10-22.26 | 24.00-25.31 |
| <b>60</b>      | 16.93-18.84 | 15.87-18.25 | 17.62-20.61 | 17.05-17.62 | 16.69-17.51 | 17.19-18.02 | 18.98-19.78 | 17.86-18.93 | 19.94-21.25 |
| <b>65</b>      | 14.08-15.87 | 13.10-15.53 | 14.38-17.14 | 13.57-14.12 | 13.34-14.12 | 13.59-14.48 | 15.30-16.15 | 14.31-15.40 | 16.15-17.47 |
| <b>70</b>      | 11.39-13.15 | 10.72-13.14 | 11.26-14.00 | 10.85-11.42 | 10.61-11.39 | 10.91-11.73 | 12.44-13.28 | 11.59-12.62 | 13.13-14.39 |
| <b>75</b>      | 8.81-10.59  | 8.19-10.48  | 8.82-11.46  | 8.10-8.66   | 7.85-8.61   | 8.15-8.98   | 9.33-10.13  | 8.55-9.60   | 9.90-11.18  |
| <b>80</b>      | 7.28-8.73   | 6.85-8.72   | 7.11-9.36   | 6.93-7.38   | 6.89-7.53   | 6.83-7.46   | 7.80-8.43   | 6.86-7.76   | 8.45-9.44   |
| <b>85+</b>     | 6.01-6.01   | 5.74-5.74   | 6.29-6.29   | 4.94-4.94   | 5.18-5.18   | 4.74-4.74   | 6.28-6.28   | 5.63-5.63   | 6.95-6.95   |

**Appendix Table 3 (Continued): 95% Confidence interval (CIs) of life expectancy by regions and sex in India, 2015-16**

| Age Group      | Central     |             |             | West        |             |             | South       |             |             |
|----------------|-------------|-------------|-------------|-------------|-------------|-------------|-------------|-------------|-------------|
|                | Total       | Male        | Female      | Total       | Male        | Female      | Total       | Male        | Female      |
| <b>Below 1</b> | 63.29-64.20 | 61.16-62.50 | 65.20-66.66 | 68.07-69.21 | 65.42-67.09 | 70.40-72.12 | 64.30-65.40 | 60.18-61.74 | 68.43-70.03 |
| <b>1</b>       | 66.17-66.96 | 64.17-65.34 | 67.94-69.14 | 69.03-70.13 | 66.56-68.00 | 71.36-72.93 | 66.19-67.19 | 62.43-63.88 | 69.90-71.33 |
| <b>5</b>       | 63.56-64.34 | 61.49-62.56 | 65.48-66.66 | 66.27-67.30 | 63.80-65.16 | 68.55-70.09 | 64.53-65.50 | 61.23-62.53 | 67.82-69.15 |
| <b>10</b>      | 59.73-60.51 | 57.74-58.81 | 61.62-62.73 | 62.44-63.42 | 59.74-61.10 | 65.03-66.43 | 62.49-63.29 | 59.38-60.52 | 65.51-66.63 |
| <b>15</b>      | 55.02-55.75 | 52.97-54.06 | 56.88-58.01 | 57.62-58.51 | 54.86-56.16 | 60.20-61.56 | 57.68-58.46 | 54.60-55.73 | 60.65-61.85 |
| <b>20</b>      | 50.48-51.20 | 48.46-49.55 | 52.36-53.43 | 52.98-53.89 | 50.16-51.45 | 55.69-56.94 | 53.02-53.81 | 49.97-51.10 | 56.00-57.05 |
| <b>25</b>      | 46.06-46.78 | 44.05-45.08 | 47.93-48.98 | 48.39-49.29 | 45.55-46.87 | 51.14-52.44 | 48.42-49.19 | 45.42-46.56 | 51.32-52.41 |
| <b>30</b>      | 41.63-42.38 | 39.73-40.74 | 43.45-44.50 | 43.84-44.66 | 41.07-42.28 | 46.51-47.78 | 44.00-44.73 | 41.11-42.21 | 46.66-47.76 |
| <b>35</b>      | 37.41-38.14 | 35.71-36.66 | 39.07-40.10 | 39.45-40.30 | 36.82-38.02 | 41.92-43.17 | 39.72-40.47 | 37.14-38.18 | 42.19-43.23 |
| <b>40</b>      | 32.97-33.69 | 31.31-32.28 | 34.52-35.52 | 34.99-35.83 | 32.50-33.72 | 37.33-38.49 | 35.41-36.12 | 33.01-34.09 | 37.62-38.65 |
| <b>45</b>      | 28.77-29.44 | 27.24-28.16 | 30.17-31.13 | 30.70-31.55 | 28.48-29.67 | 32.73-33.95 | 31.14-31.84 | 29.06-30.01 | 33.08-34.10 |
| <b>50</b>      | 24.58-25.24 | 23.19-24.11 | 25.80-26.78 | 26.58-27.37 | 24.57-25.76 | 28.28-29.46 | 26.97-27.69 | 25.18-26.13 | 28.65-29.67 |
| <b>55</b>      | 20.68-21.32 | 19.56-20.41 | 21.72-22.70 | 22.45-23.24 | 21.00-22.10 | 23.72-24.87 | 22.96-23.63 | 21.50-22.45 | 24.28-25.26 |
| <b>60</b>      | 17.22-17.83 | 16.29-17.08 | 18.05-18.94 | 18.92-19.63 | 17.80-18.84 | 19.75-20.88 | 19.50-20.17 | 18.26-19.19 | 20.56-21.56 |
| <b>65</b>      | 14.02-14.61 | 13.29-14.10 | 14.58-15.51 | 15.47-16.23 | 14.60-15.59 | 16.03-17.20 | 16.01-16.67 | 15.07-15.99 | 16.73-17.73 |
| <b>70</b>      | 11.36-11.98 | 10.72-11.52 | 11.85-12.72 | 12.26-12.97 | 11.52-12.56 | 12.69-13.75 | 13.05-13.73 | 12.40-13.33 | 13.47-14.44 |
| <b>75</b>      | 8.61-9.20   | 8.05-8.84   | 9.00-9.83   | 9.54-10.29  | 9.11-10.16  | 9.64-10.73  | 10.54-11.23 | 10.17-11.11 | 10.64-11.63 |
| <b>80</b>      | 7.50-7.98   | 7.08-7.77   | 7.77-8.44   | 7.93-8.62   | 7.37-8.39   | 8.20-9.05   | 9.06-9.65   | 8.57-9.48   | 9.23-10.07  |
| <b>85+</b>     | 5.67-5.67   | 5.67-5.67   | 5.68-5.68   | 6.49-6.49   | 6.70-6.70   | 6.38-6.38   | 7.55-7.55   | 7.35-7.35   | 7.72-7.72   |
